# Supplementary material
Source: PubMed Central journal article supplement (PMC11292587)
Supplement: NIHMS755022-supplement-supplement1.pdf [file NIHMS755022-supplement-supplement1.pdf]

[illegible]



[illegible]



[illegible]

[illegible]

[illegible]

[illegible]

[illegible]

[illegible]

[illegible]

[illegible]

[illegible]



[illegible]

[illegible]

[illegible]

[illegible]

[illegible]

[illegible]

[illegible]

[illegible]

[illegible]

[illegible]

[illegible]

[illegible]

[illegible]

[illegible]
