# Supplementary material
Source: PubMed Central journal article supplement (PMC11292587)
Supplement: NIHMS755022-supplement-supplement2.pdf [file NIHMS755022-supplement-supplement2.pdf]

| SNP        | Posiiton | Gene  | SWEIGAD-115 | SWEIGAD-108 | SWEIGAD-148 | SWEIGAD-187 | SWEIGAD-56 |
|------------|----------|-------|-------------|-------------|-------------|-------------|------------|
| rs1362070  | 29850278 | HCG4  | 0           | 0           | 1           | 0           | 1          |
| rs1633037  | 29850588 | HCG4  | 0           | 0           | 1           | 0           | 1          |
| rs9258303  | 29850909 | HCG4  | 2           | 2           | 2           | 2           | 2          |
| rs2517930  | 29853054 | HCG4  | 2           | 2           | 1           | 2           | 2          |
| rs1633021  | 29854848 | HCG4  | 0           | 0           | 1           | 0           | 1          |
| rs2743941  | 29863430 | HCG4  | 2           | 2           | 2           | 2           | 1          |
| rs1737008  | 29866096 | HCG4  | 2           | 2           | 2           | 2           | 1          |
| rs1633005  | 29872451 | HCG4  | 0           | 0           | 1           | 0           | 1          |
| rs7741100  | 29876102 | HCG4  | 2           | 2           | 2           | 2           | 2          |
| rs1611185  | 29876323 | HCG4  | 2           | 2           | 1           | 2           | 2          |
| rs1610714  | 29877808 | HCG4  | 0           | 0           | 1           | 0           | 1          |
| rs1736981  | 29878301 | HCG4  | 2           | 2           | 2           | 2           | 1          |
| rs1632994  | 29878429 | HLA-A | 2           | 2           | 1           | 2           | 2          |
| rs1736980  | 29879858 | HLA-A | 0           | 0           | 1           | 0           | 1          |
| rs1632988  | 29880374 | HCG4  | 0           | 0           | 1           | 0           | 1          |
| rs6457044  | 29880528 | HCG4  | 0           | 0           | 1           | 0           | 1          |
| rs1736976  | 29881978 | HCG4  | 0           | 0           | 1           | 0           | 1          |
| rs2523409  | 29883641 | HCG4  | 2           | 2           | 1           | 2           | 2          |
| rs3998758  | 29883641 | HCG4  | 2           | 2           | 1           | 2           | 2          |
| rs1736971  | 29884301 | HCG4  | 0           | 0           | 1           | 0           | 1          |
| rs2523408  | 29886088 | HCG4  | 0           | 0           | 1           | 0           | 1          |
| rs1736959  | 29890449 | HLA-G | 0           | 0           | 1           | 0           | 1          |
| rs1619379  | 29893214 | HLA-G | 0           | 0           | 1           | 0           | 1          |
| rs1611149  | 29897978 | HLA-G | 0           | 0           | 1           | 0           | 1          |
| rs1632948  | 29902028 | HLA-G | 0           | 0           | 1           | 0           | 1          |
| rs1736936  | 29902296 | HLA-G | 0           | 0           | 1           | 0           | 1          |
| rs1736935  | 29902422 | HLA-G | 0           | 0           | 1           | 0           | 1          |
| rs12722477 | 29904355 | HLA-G | 2           | 2           | 2           | 2           | 2          |
| rs2523790  | 29911629 | HLA-G | 2           | 2           | 2           | 2           | 2          |
| rs2735018  | 29912388 | HLA-G | 2           | 2           | 2           | 2           | 2          |
| rs2394180  | 29913178 | HLA-G | 2           | 2           | 2           | 2           | 2          |
| rs2735014  | 29913788 | HLA-G | 2           | 2           | 2           | 2           | 2          |
| rs2735005  | 29916443 | HLA-G | 2           | 2           | 2           | 2           | 2          |
| rs2735003  | 29916613 | HLA-G | 2           | 2           | 2           | 2           | 2          |
| rs2523776  | 29917173 | HLA-G | 2           | 2           | 2           | 2           | 2          |
| rs1611133  | 29917361 | HLA-G | 0           | 0           | 1           | 0           | 0          |
| rs2394186  | 29924400 | HLA-G | 2           | 2           | 2           | 2           | 2          |
| rs2734986  | 29926547 | HLA-G | 0           | 0           | 1           | 0           | 0          |
| rs2734985  | 29926641 | HLA-G | 0           | 0           | 1           | 0           | 0          |
| rs2734984  | 29928810 | HLA-G | 0           | 0           | 1           | 0           | 0          |
| rs2517861  | 29929961 | HLA-G | 0           | 0           | 1           | 0           | 0          |
| rs2975033  | 29930240 | HLA-G | 2           | 2           | 1           | 2           | 2          |
| rs3132726  | 29931585 | HLA-G | 2           | 2           | 2           | 2           | 2          |
| rs3094657  | 29936289 | HLA-G | 2           | 2           | 2           | 2           | 2          |
| rs2523822  | 29936639 | HLA-H | 2           | 2           | 1           | 2           | 2          |
| rs1611710  | 29936895 | HLA-H | 0           | 0           | 1           | 0           | 0          |

|           |          |        |   |   |   |   |   |
|-----------|----------|--------|---|---|---|---|---|
| rs1611732 | 29938987 | HLA-H  | 0 | 0 | 9 | 0 | 0 |
| rs3094165 | 29941520 | HLA-H  | 2 | 2 | 2 | 2 | 2 |
| rs2734971 | 29942428 | HLA-H  | 0 | 0 | 1 | 0 | 0 |
| rs3094161 | 29943052 | HLA-H  | 2 | 2 | 2 | 2 | 2 |
| rs3132721 | 29943612 | HLA-H  | 2 | 2 | 2 | 2 | 2 |
| rs9258866 | 29944503 | HLA-H  | 2 | 2 | 2 | 2 | 2 |
| rs2844821 | 29946621 | HLA-H  | 2 | 2 | 1 | 2 | 2 |
| rs886398  | 29947247 | HLA-H  | 2 | 2 | 2 | 2 | 2 |
| rs2523809 | 29957598 | HLA-H  | 2 | 2 | 2 | 2 | 2 |
| rs2524005 | 30007656 | HCG4P6 | 0 | 0 | 1 | 0 | 0 |
| rs2860580 | 30014670 | HLA-A  | 0 | 0 | 1 | 0 | 0 |
| rs3823342 | 30021046 | HLA-A  | 0 | 0 | 1 | 0 | 0 |
| rs2517713 | 30026078 | HLA-A  | 0 | 0 | 1 | 0 | 0 |
| rs3893538 | 30032404 | HLA-A  | 2 | 2 | 2 | 2 | 2 |
| rs2517701 | 30033951 | HLA-A  | 2 | 2 | 1 | 2 | 2 |
| rs2571400 | 30035701 | HLA-A  | 0 | 0 | 1 | 0 | 0 |
| rs2523933 | 30040271 | HCG9   | 0 | 0 | 1 | 0 | 0 |
| rs6457109 | 30041240 | HCG9   | 2 | 2 | 1 | 2 | 2 |
| rs4713270 | 30042676 | HCG9   | 2 | 2 | 1 | 2 | 2 |
| rs3893464 | 30043229 | HCG9   | 0 | 0 | 1 | 0 | 0 |
| rs2517673 | 30045221 | HCG9   | 2 | 2 | 2 | 2 | 2 |
| rs4713274 | 30045472 | HCG9   | 2 | 2 | 1 | 2 | 2 |
| rs2256543 | 30045812 | HCG9   | 0 | 0 | 1 | 0 | 0 |
| rs435766  | 30047831 | HCG9   | 2 | 2 | 2 | 2 | 2 |
| rs2256820 | 30048085 | HCG9   | 2 | 2 | 2 | 2 | 2 |
| rs2256902 | 30048351 | HCG9   | 2 | 2 | 2 | 2 | 2 |
| rs5009448 | 30048467 | HCG9   | 2 | 2 | 2 | 2 | 2 |
| rs2256919 | 30048729 | HCG9   | 2 | 2 | 2 | 2 | 2 |
| rs2523946 | 30049922 | HCG9   | 2 | 2 | 1 | 2 | 2 |
| rs3823355 | 30050062 | HCG9   | 2 | 2 | 1 | 2 | 2 |
| rs2232236 | 30050170 | HCG9   | 2 | 2 | 2 | 2 | 2 |
| rs3823359 | 30050272 | HCG9   | 2 | 2 | 2 | 2 | 2 |
| rs422640  | 30050984 | HCG9   | 2 | 2 | 2 | 2 | 2 |
| rs400488  | 30051014 | HCG9   | 2 | 2 | 2 | 2 | 2 |
| rs6904029 | 30051046 | HCG9   | 2 | 2 | 1 | 2 | 2 |
| rs2245961 | 30051983 | HCG9   | 2 | 2 | 2 | 2 | 2 |
| rs2571375 | 30053249 | HCG9   | 2 | 2 | 2 | 2 | 2 |
| rs2246199 | 30053599 | HCG9   | 2 | 2 | 2 | 2 | 2 |
| rs3132685 | 30053928 | HCG9   | 0 | 0 | 1 | 0 | 0 |
| rs2246638 | 30057476 | HCG9   | 2 | 2 | 2 | 2 | 2 |
| rs2394255 | 30057800 | HCG9   | 0 | 0 | 1 | 0 | 0 |
| rs379221  | 30058119 | HCG9   | 2 | 2 | 2 | 2 | 2 |
| rs401618  | 30058189 | HCG9   | 0 | 0 | 1 | 0 | 0 |
| rs2735067 | 30059085 | HCG9   | 0 | 0 | 1 | 0 | 0 |
| rs5025708 | 30063178 | HCG9   | 2 | 2 | 2 | 2 | 2 |
| rs4959039 | 30065048 | HCG9   | 2 | 2 | 1 | 2 | 2 |
| rs6911279 | 30073323 | HCG9   | 2 | 2 | 2 | 2 | 2 |

|           |          |         |   |   |   |   |   |
|-----------|----------|---------|---|---|---|---|---|
| rs6904120 | 30075721 | HCG9    | 2 | 2 | 2 | 2 | 2 |
| rs7758512 | 30078568 | HCG9    | 2 | 2 | 2 | 2 | 2 |
| rs4713281 | 30086331 | HCG9    | 2 | 2 | 1 | 2 | 2 |
| rs9261129 | 30087558 | HCG9    | 2 | 2 | 2 | 2 | 2 |
| rs356971  | 30087776 | HCG9    | 0 | 0 | 1 | 0 | 0 |
| rs9357092 | 30092231 | HCG9    | 2 | 2 | 1 | 2 | 2 |
| rs9261145 | 30092844 | HCG9    | 2 | 2 | 2 | 2 | 2 |
| rs3129012 | 30096621 | ZNRD1   | 0 | 0 | 1 | 0 | 0 |
| rs165255  | 30097674 | ZNRD1   | 0 | 0 | 1 | 0 | 0 |
| rs6919617 | 30099678 | ZNRD1   | 2 | 2 | 2 | 2 | 2 |
| rs6925061 | 30100265 | ZNRD1   | 2 | 2 | 2 | 2 | 2 |
| rs3121593 | 30110772 | ZNRD1   | 2 | 2 | 2 | 2 | 2 |
| rs166327  | 30110860 | ZNRD1   | 0 | 0 | 1 | 0 | 0 |
| rs3869068 | 30112031 | ZNRD1   | 2 | 2 | 2 | 2 | 2 |
| rs4711207 | 30113733 | ZNRD1   | 2 | 2 | 1 | 2 | 2 |
| rs259937  | 30115472 | ZNRD1   | 2 | 2 | 2 | 2 | 2 |
| rs259939  | 30119560 | ZNRD1   | 0 | 0 | 1 | 0 | 0 |
| rs259940  | 30119913 | ZNRD1   | 0 | 0 | 1 | 0 | 0 |
| rs259942  | 30123146 | ZNRD1   | 2 | 2 | 2 | 2 | 2 |
| rs2855591 | 30123309 | ZNRD1   | 0 | 0 | 1 | 0 | 0 |
| rs3134879 | 30123884 | ZNRD1   | 0 | 0 | 1 | 0 | 0 |
| rs2844800 | 30125735 | ZNRD1   | 2 | 2 | 2 | 2 | 2 |
| rs3869070 | 30131847 | ZNRD1   | 2 | 2 | 1 | 2 | 2 |
| rs259919  | 30133482 | ZNRD1   | 0 | 0 | 1 | 0 | 0 |
| rs3132130 | 30135431 | ZNRD1   | 2 | 2 | 2 | 2 | 2 |
| rs3757329 | 30136403 | ZNRD1   | 2 | 2 | 2 | 2 | 2 |
| rs3757333 | 30136585 | ZNRD1   | 2 | 2 | 2 | 2 | 2 |
| rs7770505 | 30136892 | ZNRD1   | 2 | 2 | 2 | 2 | 2 |
| rs7770557 | 30137088 | ZNRD1   | 2 | 2 | 2 | 2 | 2 |
| rs1150740 | 30138668 | ZNRD1   | 2 | 2 | 2 | 2 | 2 |
| rs8321    | 30140501 | ZNRD1   | 0 | 0 | 1 | 0 | 0 |
| rs3807031 | 30141863 | PPP1R11 | 2 | 2 | 2 | 2 | 2 |
| rs9261285 | 30144062 | PPP1R11 | 2 | 2 | 2 | 2 | 2 |
| rs1245371 | 30146331 | RNF39   | 0 | 0 | 1 | 0 | 0 |
| rs9261290 | 30146626 | RNF39   | 0 | 0 | 1 | 0 | 0 |
| rs2301753 | 30147219 | RNF39   | 2 | 2 | 2 | 2 | 2 |
| rs9393989 | 30148063 | RNF39   | 2 | 2 | 1 | 2 | 2 |
| rs2074480 | 30148789 | RNF39   | 2 | 2 | 2 | 2 | 2 |
| rs2074479 | 30148988 | RNF39   | 2 | 2 | 2 | 2 | 2 |
| rs3807032 | 30151758 | RNF39   | 2 | 2 | 2 | 2 | 2 |
| rs3807034 | 30151971 | RNF39   | 2 | 2 | 2 | 2 | 2 |
| rs3132682 | 30152367 | RNF39   | 2 | 2 | 1 | 2 | 2 |
| rs3807035 | 30152806 | RNF39   | 2 | 2 | 2 | 2 | 2 |
| rs1150735 | 30153178 | RNF39   | 0 | 0 | 1 | 0 | 0 |
| rs2394734 | 30154225 | RNF39   | 2 | 2 | 2 | 2 | 2 |
| rs6909253 | 30163622 | RNF39   | 2 | 2 | 1 | 2 | 2 |
| rs1264709 | 30164455 | RNF39   | 0 | 0 | 1 | 0 | 0 |

|            |          |        |   |   |   |   |   |
|------------|----------|--------|---|---|---|---|---|
| rs1264708  | 30165133 | TRIM31 | 2 | 2 | 2 | 2 | 2 |
| rs11965797 | 30165742 | TRIM31 | 2 | 2 | 2 | 2 | 2 |
| rs7753935  | 30168762 | TRIM31 | 2 | 2 | 2 | 2 | 2 |
| rs9261387  | 30169340 | TRIM31 | 2 | 2 | 2 | 2 | 2 |
| rs6923832  | 30170037 | TRIM31 | 2 | 2 | 2 | 2 | 2 |
| rs7765810  | 30171475 | TRIM31 | 2 | 2 | 2 | 2 | 2 |
| rs1264703  | 30173395 | TRIM31 | 0 | 0 | 1 | 0 | 0 |
| rs1264702  | 30173554 | TRIM31 | 0 | 0 | 1 | 0 | 0 |
| rs916570   | 30174010 | TRIM31 | 0 | 0 | 1 | 0 | 0 |
| rs1264701  | 30174337 | TRIM31 | 2 | 2 | 2 | 2 | 2 |
| rs1264697  | 30175547 | TRIM31 | 0 | 0 | 1 | 0 | 0 |
| rs1264695  | 30175871 | TRIM31 | 0 | 0 | 1 | 0 | 0 |
| rs1116221  | 30179309 | TRIM31 | 0 | 0 | 1 | 0 | 0 |
| rs3132680  | 30181174 | TRIM31 | 2 | 2 | 2 | 2 | 2 |
| rs2844795  | 30181826 | TRIM31 | 2 | 2 | 2 | 2 | 2 |
| rs3132679  | 30183822 | TRIM31 | 2 | 2 | 2 | 2 | 2 |
| rs2023472  | 30183843 | TRIM31 | 0 | 0 | 1 | 0 | 0 |
| rs2074483  | 30184734 | TRIM31 | 0 | 0 | 1 | 0 | 0 |
| rs2523990  | 30185208 | TRIM31 | 2 | 2 | 2 | 2 | 2 |
| rs4959041  | 30185946 | TRIM31 | 2 | 2 | 1 | 2 | 2 |
| rs2523989  | 30186254 | TRIM31 | 0 | 0 | 1 | 0 | 0 |
| rs2523988  | 30187108 | TRIM31 | 0 | 0 | 1 | 0 | 0 |
| rs2523987  | 30187972 | TRIM31 | 0 | 0 | 1 | 0 | 0 |
| rs3734838  | 30188210 | TRIM31 | 2 | 2 | 2 | 2 | 2 |
| rs2517598  | 30188253 | TRIM31 | 0 | 0 | 1 | 0 | 0 |
| rs2523984  | 30189982 | TRIM31 | 0 | 0 | 1 | 0 | 0 |
| rs1015465  | 30194319 | TRIM31 | 2 | 2 | 2 | 2 | 2 |
| rs9261440  | 30198799 | TRIM31 | 2 | 2 | 1 | 2 | 2 |
| rs9261441  | 30199737 | TRIM31 | 2 | 2 | 2 | 2 | 2 |
| rs1419675  | 30200686 | TRIM40 | 2 | 2 | 2 | 2 | 2 |
| rs2517592  | 30201116 | TRIM40 | 0 | 0 | 1 | 0 | 0 |
| rs10947055 | 30201343 | TRIM40 | 2 | 2 | 2 | 2 | 2 |
| rs1419673  | 30204696 | TRIM40 | 2 | 2 | 1 | 2 | 2 |
| rs757263   | 30206302 | TRIM40 | 2 | 2 | 1 | 2 | 2 |
| rs9461570  | 30207437 | TRIM40 | 2 | 2 | 2 | 2 | 2 |
| rs1362104  | 30209635 | TRIM40 | 0 | 0 | 1 | 0 | 0 |
| rs2523995  | 30210163 | TRIM40 | 2 | 2 | 2 | 2 | 2 |
| rs4713293  | 30210394 | TRIM40 | 2 | 2 | 1 | 2 | 2 |
| rs1541268  | 30211373 | TRIM40 | 2 | 2 | 1 | 2 | 2 |
| rs2021723  | 30211902 | TRIM40 | 2 | 2 | 2 | 2 | 2 |
| rs2107202  | 30213722 | TRIM40 | 2 | 2 | 2 | 2 | 2 |
| rs9261492  | 30218037 | TRIM40 | 2 | 2 | 1 | 2 | 2 |
| rs9261496  | 30218993 | TRIM40 | 2 | 2 | 1 | 2 | 2 |
| rs3815081  | 30222053 | TRIM40 | 2 | 2 | 2 | 2 | 2 |
| rs757262   | 30222934 | TRIM40 | 2 | 2 | 1 | 2 | 2 |
| rs757259   | 30223521 | TRIM40 | 2 | 2 | 1 | 2 | 2 |
| rs1557608  | 30226561 | TRIM10 | 2 | 2 | 1 | 2 | 2 |

|            |          |          |   |   |   |   |   |
|------------|----------|----------|---|---|---|---|---|
| rs4392759  | 30226686 | TRIM10   | 2 | 2 | 1 | 2 | 2 |
| rs9468692  | 30227869 | TRIM10   | 2 | 2 | 2 | 2 | 2 |
| rs2257914  | 30228542 | TRIM10   | 2 | 2 | 2 | 2 | 2 |
| rs2517653  | 30229164 | TRIM10   | 2 | 2 | 1 | 2 | 2 |
| rs2022065  | 30229439 | TRIM10   | 2 | 2 | 1 | 2 | 2 |
| rs2517646  | 30230554 | TRIM10   | 2 | 2 | 2 | 2 | 2 |
| rs9261535  | 30235302 | TRIM10   | 2 | 2 | 1 | 2 | 2 |
| rs12212092 | 30236421 | TRIM10   | 2 | 2 | 2 | 2 | 2 |
| rs2517625  | 30238900 | TRIM10   | 2 | 2 | 2 | 2 | 2 |
| rs1008403  | 30240806 | TRIM15   | 2 | 2 | 2 | 2 | 2 |
| rs9368624  | 30243956 | TRIM15   | 2 | 2 | 2 | 2 | 2 |
| rs929157   | 30245188 | TRIM15   | 0 | 0 | 1 | 0 | 0 |
| rs2074475  | 30245869 | TRIM15   | 2 | 2 | 2 | 2 | 2 |
| rs1029239  | 30246141 | TRIM15   | 0 | 0 | 1 | 0 | 0 |
| rs929156   | 30247678 | TRIM15   | 2 | 2 | 1 | 2 | 2 |
| rs6905949  | 30248504 | TRIM15   | 2 | 2 | 2 | 2 | 2 |
| rs757257   | 30250437 | TRIM15   | 1 | 1 | 0 | 1 | 1 |
| rs2844786  | 30252399 | TRIM15   | 2 | 2 | 1 | 2 | 2 |
| rs2844782  | 30258022 | TRIM26   | 2 | 2 | 1 | 2 | 2 |
| rs2239530  | 30260094 | TRIM26   | 2 | 2 | 1 | 2 | 2 |
| rs2517623  | 30260940 | TRIM26   | 2 | 2 | 2 | 2 | 2 |
| rs718254   | 30267018 | TRIM26   | 0 | 0 | 0 | 0 | 0 |
| rs2284165  | 30268034 | TRIM26   | 2 | 2 | 2 | 2 | 2 |
| rs4711211  | 30270788 | TRIM26   | 2 | 2 | 1 | 2 | 2 |
| rs2523721  | 30274245 | TRIM26   | 0 | 0 | 1 | 0 | 0 |
| rs2523720  | 30274865 | TRIM26   | 0 | 0 | 1 | 0 | 0 |
| rs2517610  | 30278259 | TRIM26   | 0 | 0 | 1 | 0 | 0 |
| rs2284168  | 30280212 | TRIM26   | 2 | 2 | 2 | 2 | 2 |
| rs3130383  | 30287005 | TRIM26   | 0 | 0 | 0 | 0 | 0 |
| rs2844775  | 30287401 | TRIM26   | 2 | 2 | 1 | 2 | 2 |
| rs1345229  | 30290374 | TRIM26   | 2 | 2 | 2 | 2 | 2 |
| rs3132667  | 30299566 | TRIM26   | 0 | 0 | 0 | 0 | 0 |
| rs3129690  | 30304834 | TRIM26   | 0 | 0 | 0 | 0 | 0 |
| rs3094138  | 30306995 | TRIM26   | 2 | 2 | 2 | 2 | 2 |
| rs885916   | 30310550 | TRIM26   | 0 | 0 | 1 | 0 | 0 |
| rs2844779  | 30313386 | FLJ45422 | 2 | 2 | 1 | 2 | 2 |
| rs2844773  | 30315474 | FLJ45422 | 0 | 0 | 1 | 0 | 0 |
| rs2253163  | 30317041 | FLJ45422 | 2 | 2 | 1 | 2 | 2 |
| rs1362089  | 30317781 | FLJ45422 | 2 | 2 | 2 | 2 | 2 |
| rs9261588  | 30318786 | FLJ45422 | 2 | 2 | 2 | 2 | 2 |
| rs2523741  | 30319882 | FLJ45422 | 2 | 2 | 2 | 2 | 2 |
| rs3094073  | 30339203 | FLJ45422 | 0 | 0 | 1 | 0 | 0 |
| rs3130404  | 30340229 | FLJ45422 | 0 | 0 | 1 | 0 | 0 |
| rs2516698  | 30340353 | FLJ45422 | 2 | 2 | 2 | 2 | 2 |
| rs1264624  | 30363068 | FLJ45422 | 2 | 2 | 2 | 2 | 2 |
| rs10484551 | 30364817 | FLJ45422 | 2 | 2 | 2 | 2 | 2 |
| rs2285799  | 30365672 | FLJ45422 | 2 | 2 | 2 | 2 | 2 |

|            |          |          |   |   |   |   |   |
|------------|----------|----------|---|---|---|---|---|
| rs1048664  | 30370491 | FLJ45422 | 2 | 2 | 2 | 2 | 2 |
| rs261949   | 30378059 | TRIM39   | 2 | 2 | 2 | 2 | 2 |
| rs261943   | 30381350 | TRIM39   | 2 | 2 | 2 | 2 | 2 |
| rs9380167  | 30382440 | TRIM39   | 2 | 2 | 2 | 2 | 2 |
| rs928822   | 30383225 | TRIM39   | 2 | 2 | 1 | 2 | 2 |
| rs3130380  | 30387109 | TRIM39   | 0 | 0 | 1 | 0 | 0 |
| rs11757879 | 30387886 | TRIM39   | 2 | 2 | 2 | 2 | 2 |
| rs3094065  | 30390311 | TRIM39   | 2 | 2 | 2 | 2 | 2 |
| rs9357097  | 30393100 | TRIM39   | 2 | 2 | 2 | 2 | 2 |
| rs1264583  | 30401462 | TRIM39   | 2 | 2 | 2 | 2 | 2 |
| rs1264582  | 30402569 | TRIM39   | 2 | 2 | 2 | 2 | 2 |
| rs1110464  | 30404050 | TRIM39   | 2 | 2 | 1 | 2 | 2 |
| rs3094064  | 30404232 | TRIM39   | 0 | 0 | 1 | 0 | 0 |
| rs1264581  | 30405484 | TRIM39   | 2 | 2 | 2 | 2 | 2 |
| rs12663184 | 30409579 | TRIM39   | 2 | 2 | 2 | 2 | 2 |
| rs3778624  | 30410579 | TRIM39   | 2 | 2 | 2 | 2 | 2 |
| rs3129838  | 30414532 | TRIM39   | 2 | 2 | 2 | 2 | 2 |
| rs3129840  | 30415321 | TRIM39   | 0 | 0 | 1 | 0 | 0 |
| rs2240058  | 30418479 | TRIM39   | 2 | 2 | 2 | 2 | 2 |
| rs2516690  | 30421319 | TRIM39   | 2 | 2 | 2 | 2 | 2 |
| rs974962   | 30422586 | RPP21    | 2 | 2 | 2 | 2 | 2 |
| rs974961   | 30422990 | RPP21    | 2 | 2 | 1 | 2 | 2 |
| rs9380174  | 30424718 | RPP21    | 2 | 2 | 2 | 2 | 2 |
| rs3094061  | 30429168 | RPP21    | 0 | 0 | 1 | 0 | 0 |
| rs984802   | 30429340 | RPP21    | 2 | 2 | 1 | 2 | 2 |
| rs3094626  | 30431602 | RPP21    | 0 | 0 | 0 | 0 | 0 |
| rs3130379  | 30433510 | RPP21    | 2 | 2 | 2 | 2 | 1 |
| rs3130350  | 30435818 | RPP21    | 0 | 0 | 1 | 0 | 0 |
| rs3094622  | 30435931 | RPP21    | 0 | 0 | 1 | 0 | 0 |
| rs3130352  | 30436336 | RPP21    | 0 | 0 | 1 | 0 | 0 |
| rs11754099 | 30437080 | RPP21    | 2 | 2 | 2 | 2 | 2 |
| rs1012411  | 30440534 | RPP21    | 0 | 0 | 1 | 0 | 0 |
| rs3094054  | 30441484 | RPP21    | 0 | 0 | 1 | 0 | 0 |
| rs2040450  | 30442318 | RPP21    | 2 | 2 | 2 | 2 | 2 |
| rs3129809  | 30443600 | RPP21    | 0 | 0 | 1 | 0 | 0 |
| rs2022079  | 30445717 | RPP21    | 2 | 2 | 1 | 2 | 2 |
| rs2844748  | 30446117 | RPP21    | 2 | 2 | 2 | 2 | 2 |
| rs3129813  | 30446226 | RPP21    | 0 | 0 | 0 | 0 | 0 |
| rs17839997 | 30447272 | RPP21    | 2 | 2 | 2 | 2 | 2 |
| rs2523724  | 30447282 | RPP21    | 2 | 2 | 2 | 2 | 2 |
| rs3130361  | 30447543 | RPP21    | 2 | 2 | 2 | 2 | 2 |
| rs2844746  | 30447581 | RPP21    | 2 | 2 | 2 | 2 | 2 |
| rs3129820  | 30451548 | RPP21    | 0 | 0 | 1 | 0 | 0 |
| rs2844745  | 30451682 | RPP21    | 2 | 2 | 2 | 2 | 2 |
| rs3132633  | 30452145 | RPP21    | 0 | 0 | 0 | 0 | 0 |
| rs3132632  | 30452441 | RPP21    | 0 | 0 | 0 | 0 | 0 |
| rs970270   | 30455285 | RPP21    | 2 | 2 | 2 | 2 | 2 |

|           |          |       |   |   |   |   |   |
|-----------|----------|-------|---|---|---|---|---|
| rs7744914 | 30456226 | RPP21 | 2 | 2 | 2 | 2 | 2 |
| rs3132622 | 30456653 | RPP21 | 0 | 0 | 0 | 0 | 0 |
| rs2844743 | 30456811 | RPP21 | 2 | 2 | 2 | 2 | 2 |
| rs3130122 | 30460506 | RPP21 | 0 | 0 | 0 | 0 | 0 |
| rs3130109 | 30470730 | RPP21 | 0 | 0 | 0 | 0 | 0 |
| rs2516688 | 30472503 | RPP21 | 2 | 2 | 2 | 2 | 2 |
| rs1264569 | 30473299 | RPP21 | 2 | 2 | 2 | 2 | 2 |
| rs1264567 | 30474079 | RPP21 | 2 | 2 | 2 | 2 | 2 |
| rs7452103 | 30475573 | RPP21 | 2 | 2 | 1 | 2 | 2 |
| rs1034325 | 30476436 | RPP21 | 2 | 2 | 1 | 2 | 2 |
| rs1034323 | 30476614 | RPP21 | 2 | 2 | 1 | 2 | 2 |
| rs1419691 | 30478331 | RPP21 | 2 | 2 | 1 | 2 | 2 |
| rs1419689 | 30478567 | RPP21 | 2 | 2 | 1 | 2 | 2 |
| rs7741364 | 30480549 | RPP21 | 2 | 2 | 1 | 2 | 2 |
| rs1264562 | 30480791 | RPP21 | 0 | 9 | 1 | 9 | 9 |
| rs9261761 | 30480966 | RPP21 | 2 | 2 | 1 | 2 | 2 |
| rs1264550 | 30485177 | RPP21 | 0 | 0 | 1 | 0 | 0 |
| rs1079991 | 30485839 | RPP21 | 2 | 2 | 2 | 2 | 2 |
| rs4713324 | 30488252 | RPP21 | 2 | 2 | 1 | 2 | 2 |
| rs1150769 | 30490951 | RPP21 | 2 | 2 | 2 | 2 | 2 |
| rs1150770 | 30491935 | RPP21 | 0 | 0 | 1 | 0 | 0 |
| rs2074502 | 30492301 | RPP21 | 2 | 2 | 2 | 2 | 2 |
| rs1573294 | 30494394 | HLA-E | 2 | 2 | 1 | 2 | 2 |
| rs1264542 | 30494975 | HLA-E | 2 | 2 | 2 | 2 | 2 |
| rs1264541 | 30495318 | HLA-E | 2 | 2 | 2 | 2 | 2 |
| rs9261947 | 30502607 | HLA-E | 2 | 2 | 1 | 2 | 2 |
| rs1264524 | 30512765 | HLA-E | 0 | 0 | 1 | 0 | 0 |
| rs1079541 | 30514735 | HLA-E | 2 | 2 | 1 | 2 | 2 |
| rs9295863 | 30516244 | HLA-E | 2 | 2 | 1 | 2 | 2 |
| rs9295871 | 30519068 | HLA-E | 2 | 2 | 1 | 2 | 2 |
| rs1264511 | 30521951 | HLA-E | 2 | 2 | 2 | 2 | 2 |
| rs1362115 | 30522827 | HLA-E | 2 | 2 | 1 | 2 | 2 |
| rs2105961 | 30523615 | HLA-E | 0 | 0 | 1 | 0 | 0 |
| rs1076832 | 30527810 | HLA-E | 2 | 2 | 2 | 2 | 2 |
| rs2844729 | 30530611 | HLA-E | 2 | 2 | 2 | 2 | 2 |
| rs2516677 | 30532602 | HLA-E | 0 | 0 | 1 | 0 | 0 |
| rs2187975 | 30533136 | HLA-E | 0 | 0 | 1 | 0 | 0 |
| rs2524180 | 30534109 | HLA-E | 2 | 2 | 2 | 2 | 2 |
| rs2077573 | 30536330 | HLA-E | 2 | 2 | 1 | 2 | 2 |
| rs2021368 | 30537362 | HLA-E | 2 | 2 | 2 | 2 | 2 |
| rs2516676 | 30538461 | HLA-E | 2 | 2 | 2 | 2 | 2 |
| rs3130141 | 30540156 | HLA-E | 0 | 0 | 1 | 0 | 0 |
| rs2524173 | 30540823 | HLA-E | 2 | 2 | 2 | 2 | 2 |
| rs2524172 | 30541590 | HLA-E | 2 | 2 | 2 | 2 | 2 |
| rs7764934 | 30542545 | HLA-E | 2 | 2 | 1 | 2 | 2 |
| rs6930977 | 30543267 | HLA-E | 2 | 2 | 2 | 2 | 2 |
| rs9295895 | 30546205 | HLA-E | 2 | 2 | 1 | 2 | 2 |

|            |          |          |   |   |   |   |   |
|------------|----------|----------|---|---|---|---|---|
| rs2021720  | 30557223 | HLA-E    | 2 | 2 | 1 | 2 | 2 |
| rs2021719  | 30557461 | HLA-E    | 2 | 2 | 1 | 2 | 2 |
| rs3094694  | 30559883 | HLA-E    | 0 | 0 | 1 | 0 | 0 |
| rs762324   | 30563865 | HLA-E    | 2 | 2 | 2 | 2 | 2 |
| rs1264459  | 30563899 | HLA-E    | 2 | 2 | 2 | 2 | 2 |
| rs2508024  | 30573491 | HLA-E    | 2 | 2 | 2 | 2 | 2 |
| rs7754598  | 30575674 | HLA-E    | 2 | 2 | 2 | 2 | 2 |
| rs9394008  | 30576142 | HLA-E    | 2 | 2 | 2 | 2 | 2 |
| rs3131115  | 30576770 | HLA-E    | 0 | 0 | 0 | 0 | 0 |
| rs2429657  | 30579499 | HLA-E    | 2 | 2 | 2 | 2 | 2 |
| rs2023609  | 30584013 | HLA-E    | 2 | 2 | 2 | 2 | 2 |
| rs975195   | 30585926 | HLA-E    | 2 | 2 | 2 | 2 | 2 |
| rs7768140  | 30596182 | GNL1     | 2 | 2 | 2 | 2 | 2 |
| rs2524226  | 30605469 | GNL1     | 2 | 2 | 2 | 2 | 2 |
| rs1468079  | 30614362 | GNL1     | 2 | 2 | 2 | 2 | 2 |
| rs2524222  | 30619149 | GNL1     | 2 | 2 | 2 | 2 | 2 |
| rs1058318  | 30620142 | GNL1     | 2 | 2 | 2 | 2 | 2 |
| rs2844713  | 30627237 | GNL1     | 2 | 2 | 2 | 2 | 2 |
| rs2074505  | 30629116 | GNL1     | 2 | 2 | 2 | 2 | 2 |
| rs4713337  | 30637454 | PRR3     | 1 | 1 | 1 | 1 | 1 |
| rs3888777  | 30637795 | PRR3     | 2 | 2 | 2 | 2 | 2 |
| rs2074504  | 30638224 | PRR3     | 2 | 2 | 2 | 2 | 2 |
| rs2074503  | 30638475 | PRR3     | 2 | 2 | 2 | 2 | 2 |
| rs3132613  | 30645585 | ABCF1    | 2 | 2 | 2 | 2 | 2 |
| rs2269709  | 30648869 | ABCF1    | 2 | 2 | 2 | 2 | 2 |
| rs3132610  | 30652380 | ABCF1    | 0 | 0 | 1 | 0 | 0 |
| rs6902544  | 30656189 | ABCF1    | 2 | 2 | 2 | 2 | 2 |
| rs3130244  | 30660916 | ABCF1    | 2 | 2 | 2 | 2 | 2 |
| rs1264432  | 30670000 | ABCF1    | 2 | 2 | 2 | 2 | 2 |
| rs1264429  | 30673080 | PPP1R10  | 2 | 2 | 2 | 2 | 2 |
| rs1264423  | 30679450 | PPP1R10  | 0 | 0 | 1 | 0 | 0 |
| rs1264420  | 30683582 | PPP1R10  | 2 | 2 | 1 | 2 | 2 |
| rs1264419  | 30684760 | PPP1R10  | 0 | 0 | 1 | 0 | 0 |
| rs2267637  | 30686314 | PPP1R10  | 2 | 2 | 2 | 2 | 2 |
| rs6457249  | 30687535 | PPP1R10  | 2 | 2 | 2 | 2 | 2 |
| rs3895681  | 30693750 | MRPS18B  | 2 | 2 | 2 | 2 | 2 |
| rs2517565  | 30702373 | MRPS18B  | 2 | 2 | 2 | 2 | 2 |
| rs4713340  | 30707681 | C6orf134 | 2 | 2 | 2 | 2 | 2 |
| rs12665339 | 30709211 | C6orf134 | 2 | 2 | 2 | 2 | 2 |
| rs2394390  | 30709800 | C6orf134 | 2 | 2 | 2 | 2 | 2 |
| rs3132608  | 30717640 | C6orf134 | 2 | 2 | 2 | 2 | 2 |
| rs1140809  | 30719655 | C6orf134 | 0 | 0 | 1 | 0 | 0 |
| rs1076829  | 30735195 | DHX16    | 0 | 0 | 1 | 0 | 0 |
| rs9262138  | 30735846 | DHX16    | 2 | 2 | 2 | 2 | 2 |
| rs1076828  | 30736231 | DHX16    | 0 | 0 | 1 | 0 | 0 |
| rs4713346  | 30739042 | DHX16    | 2 | 2 | 2 | 2 | 2 |
| rs9295901  | 30747136 | DHX16    | 2 | 2 | 2 | 2 | 2 |



|            |          |       |   |   |   |   |   |
|------------|----------|-------|---|---|---|---|---|
| rs9468805  | 30751688 | DHX16 | 2 | 2 | 2 | 2 | 2 |
| rs2269707  | 30752503 | DHX16 | 2 | 2 | 2 | 2 | 2 |
| rs11965214 | 30754984 | DHX16 | 2 | 2 | 2 | 2 | 2 |
| rs6457254  | 30757113 | NRM   | 2 | 2 | 2 | 2 | 2 |
| rs3129996  | 30759566 | NRM   | 2 | 2 | 2 | 2 | 2 |
| rs9262143  | 30760760 | NRM   | 0 | 0 | 1 | 0 | 0 |
| rs2269706  | 30760851 | NRM   | 2 | 2 | 2 | 2 | 2 |
| rs9262145  | 30762510 | NRM   | 2 | 2 | 2 | 2 | 2 |
| rs1075496  | 30766218 | NRM   | 0 | 0 | 1 | 0 | 0 |
| rs9468811  | 30774648 | MDC1  | 2 | 2 | 2 | 2 | 2 |
| rs2894043  | 30776467 | MDC1  | 2 | 2 | 2 | 2 | 2 |
| rs2075015  | 30788587 | MDC1  | 2 | 2 | 2 | 2 | 2 |
| rs9262152  | 30788895 | MDC1  | 2 | 2 | 2 | 2 | 2 |
| rs6924270  | 30789959 | MDC1  | 2 | 2 | 2 | 2 | 2 |
| rs4713354  | 30793399 | MDC1  | 2 | 2 | 2 | 2 | 2 |
| rs3132585  | 30795593 | TUBB  | 0 | 0 | 1 | 0 | 0 |
| rs3132584  | 30796406 | TUBB  | 0 | 0 | 1 | 0 | 0 |
| rs25527    | 30798917 | TUBB  | 2 | 2 | 2 | 2 | 2 |
| rs12182166 | 30801456 | TUBB  | 2 | 2 | 2 | 2 | 2 |
| rs3094127  | 30805426 | FLOT1 | 0 | 0 | 1 | 0 | 0 |
| rs1064627  | 30806520 | FLOT1 | 0 | 0 | 1 | 0 | 0 |
| rs3909184  | 30807363 | FLOT1 | 2 | 2 | 2 | 2 | 2 |
| rs2844704  | 30813992 | FLOT1 | 2 | 2 | 1 | 2 | 2 |
| rs3130660  | 30814340 | FLOT1 | 0 | 0 | 1 | 0 | 0 |
| rs1059612  | 30816934 | FLOT1 | 0 | 0 | 1 | 0 | 0 |
| rs2535319  | 30822458 | IER3  | 0 | 0 | 0 | 0 | 0 |
| rs4713358  | 30824096 | IER3  | 2 | 2 | 2 | 2 | 2 |
| rs12210092 | 30824698 | IER3  | 2 | 2 | 2 | 2 | 2 |
| rs9262164  | 30825368 | IER3  | 2 | 2 | 2 | 2 | 2 |
| rs2535324  | 30826014 | IER3  | 0 | 0 | 1 | 0 | 0 |
| rs12202428 | 30827888 | IER3  | 2 | 2 | 2 | 2 | 2 |
| rs3129973  | 30829122 | IER3  | 0 | 0 | 1 | 0 | 0 |
| rs11964663 | 30829912 | IER3  | 2 | 2 | 2 | 2 | 2 |
| rs2394401  | 30832409 | IER3  | 2 | 2 | 2 | 2 | 2 |
| rs3095341  | 30834727 | IER3  | 2 | 2 | 1 | 2 | 2 |
| rs3131036  | 30836269 | IER3  | 0 | 0 | 1 | 0 | 0 |
| rs11966040 | 30837466 | IER3  | 2 | 2 | 2 | 2 | 2 |
| rs6926530  | 30838246 | IER3  | 2 | 2 | 2 | 2 | 2 |
| rs3094121  | 30838939 | IER3  | 0 | 0 | 1 | 0 | 0 |
| rs3129975  | 30840033 | IER3  | 0 | 0 | 1 | 0 | 0 |
| rs12210947 | 30843084 | IER3  | 2 | 2 | 2 | 2 | 2 |
| rs12526186 | 30844130 | IER3  | 2 | 2 | 2 | 2 | 2 |
| rs3130666  | 30848139 | IER3  | 2 | 2 | 2 | 2 | 2 |
| rs3130667  | 30851220 | IER3  | 2 | 2 | 1 | 2 | 2 |
| rs4713367  | 30864801 | IER3  | 2 | 2 | 2 | 2 | 2 |
| rs3129980  | 30866350 | IER3  | 0 | 0 | 1 | 0 | 0 |
| rs3131043  | 30866445 | IER3  | 0 | 0 | 1 | 0 | 0 |

|            |          |      |   |   |   |   |   |
|------------|----------|------|---|---|---|---|---|
| rs3131050  | 30868004 | IER3 | 0 | 0 | 1 | 0 | 0 |
| rs3094112  | 30869713 | IER3 | 0 | 0 | 1 | 0 | 0 |
| rs6930444  | 30871611 | IER3 | 2 | 2 | 2 | 2 | 2 |
| rs3130641  | 30872060 | IER3 | 0 | 0 | 1 | 0 | 0 |
| rs12660883 | 30872399 | IER3 | 2 | 2 | 2 | 2 | 2 |
| rs1264375  | 30874190 | IER3 | 0 | 0 | 1 | 0 | 0 |
| rs4587208  | 30874992 | IER3 | 2 | 2 | 2 | 2 | 2 |
| rs4248149  | 30875606 | IER3 | 2 | 2 | 2 | 2 | 2 |
| rs4711235  | 30876615 | IER3 | 2 | 2 | 2 | 2 | 2 |
| rs3129988  | 30877457 | IER3 | 2 | 2 | 2 | 2 | 2 |
| rs9378109  | 30882453 | IER3 | 2 | 2 | 2 | 2 | 2 |
| rs1264362  | 30884569 | IER3 | 2 | 2 | 1 | 2 | 2 |
| rs4327730  | 30888915 | IER3 | 2 | 2 | 2 | 2 | 2 |
| rs886424   | 30889981 | IER3 | 0 | 0 | 1 | 0 | 0 |
| rs2894046  | 30890084 | DDR1 | 2 | 2 | 2 | 2 | 2 |
| rs2394412  | 30890214 | DDR1 | 2 | 2 | 2 | 2 | 2 |
| rs9295924  | 30890340 | DDR1 | 2 | 2 | 2 | 2 | 2 |
| rs4713380  | 30893252 | DDR1 | 2 | 2 | 2 | 2 | 2 |
| rs4713383  | 30895220 | DDR1 | 2 | 2 | 2 | 2 | 2 |
| rs4713385  | 30895572 | DDR1 | 2 | 2 | 2 | 2 | 2 |
| rs3094111  | 30896170 | DDR1 | 2 | 2 | 2 | 2 | 2 |
| rs1264352  | 30897626 | DDR1 | 0 | 0 | 1 | 0 | 0 |
| rs4713391  | 30900214 | DDR1 | 2 | 2 | 2 | 2 | 2 |
| rs12192704 | 30900249 | DDR1 | 2 | 2 | 2 | 2 | 2 |
| rs4947290  | 30902384 | DDR1 | 2 | 2 | 2 | 2 | 2 |
| rs915664   | 30902596 | DDR1 | 2 | 2 | 1 | 2 | 2 |
| rs3130785  | 30904717 | DDR1 | 2 | 2 | 2 | 2 | 2 |
| rs1264344  | 30908556 | DDR1 | 2 | 2 | 1 | 2 | 2 |
| rs3095352  | 30913900 | DDR1 | 2 | 2 | 2 | 2 | 2 |
| rs6915684  | 30918633 | DDR1 | 2 | 2 | 1 | 2 | 2 |
| rs2394450  | 30925480 | DDR1 | 2 | 2 | 2 | 2 | 2 |
| rs2250264  | 30929166 | DDR1 | 2 | 2 | 1 | 2 | 2 |
| rs3095345  | 30930392 | DDR1 | 2 | 2 | 2 | 2 | 2 |
| rs6931717  | 30930392 | DDR1 | 2 | 2 | 2 | 2 | 2 |
| rs3130653  | 30930750 | DDR1 | 2 | 2 | 2 | 2 | 2 |
| rs3130654  | 30931054 | DDR1 | 2 | 2 | 2 | 2 | 2 |
| rs2844659  | 30932511 | DDR1 | 0 | 0 | 1 | 0 | 0 |
| rs2844657  | 30937501 | DDR1 | 0 | 0 | 1 | 0 | 0 |
| rs7761138  | 30938271 | DDR1 | 2 | 2 | 2 | 2 | 2 |
| rs3095354  | 30944090 | DDR1 | 2 | 2 | 2 | 2 | 2 |
| rs2844654  | 30946667 | DDR1 | 2 | 2 | 1 | 2 | 2 |
| rs2535339  | 30947409 | DDR1 | 2 | 2 | 1 | 2 | 2 |
| rs1264333  | 30952293 | DDR1 | 2 | 2 | 1 | 2 | 2 |
| rs7756521  | 30956232 | DDR1 | 2 | 2 | 2 | 2 | 2 |
| rs9461638  | 30959284 | DDR1 | 2 | 2 | 2 | 2 | 2 |
| rs1264323  | 30963886 | DDR1 | 0 | 0 | 1 | 0 | 0 |
| rs6457281  | 30965774 | DDR1 | 2 | 2 | 2 | 2 | 2 |

|            |          |        |   |   |   |   |   |
|------------|----------|--------|---|---|---|---|---|
| rs1264322  | 30965873 | DDR1   | 0 | 0 | 1 | 0 | 0 |
| rs1264318  | 30971509 | DDR1   | 0 | 0 | 1 | 0 | 0 |
| rs1049623  | 30972808 | DDR1   | 0 | 0 | 1 | 0 | 0 |
| rs1049633  | 30975506 | DDR1   | 0 | 0 | 1 | 0 | 0 |
| rs9468846  | 30978742 | DDR1   | 2 | 2 | 2 | 2 | 2 |
| rs2894054  | 30980253 | GTF2H4 | 2 | 2 | 2 | 2 | 2 |
| rs3130780  | 30982287 | GTF2H4 | 2 | 2 | 2 | 2 | 2 |
| rs3218814  | 30986558 | GTF2H4 | 2 | 2 | 2 | 2 | 2 |
| rs1264308  | 30987966 | GTF2H4 | 0 | 0 | 1 | 0 | 0 |
| rs3218819  | 30988076 | GTF2H4 | 2 | 2 | 2 | 2 | 2 |
| rs3218822  | 30988315 | GTF2H4 | 2 | 2 | 2 | 2 | 2 |
| rs1264303  | 30990492 | VARSL  | 2 | 2 | 1 | 2 | 2 |
| rs1264302  | 30990613 | VARSL  | 2 | 2 | 1 | 2 | 2 |
| rs2074506  | 30998462 | VARSL  | 2 | 2 | 1 | 2 | 2 |
| rs753725   | 30998850 | VARSL  | 0 | 0 | 1 | 0 | 0 |
| rs2257347  | 31000033 | VARSL  | 2 | 2 | 2 | 2 | 2 |
| rs2252760  | 31000356 | VARSL  | 2 | 2 | 1 | 2 | 2 |
| rs2532940  | 31000571 | VARSL  | 2 | 2 | 1 | 2 | 2 |
| rs1043483  | 31001707 | VARSL  | 2 | 2 | 2 | 2 | 2 |
| rs4678     | 31001920 | VARSL  | 0 | 0 | 1 | 0 | 0 |
| rs2532934  | 31002738 | VARSL  | 0 | 0 | 1 | 0 | 0 |
| rs3873332  | 31003969 | VARSL  | 2 | 2 | 2 | 2 | 2 |
| rs3873334  | 31004126 | VARSL  | 2 | 2 | 2 | 2 | 2 |
| rs2517459  | 31005001 | SFTPG  | 2 | 2 | 2 | 2 | 2 |
| rs2253588  | 31007356 | SFTPG  | 2 | 2 | 2 | 2 | 2 |
| rs2286655  | 31007725 | SFTPG  | 2 | 2 | 2 | 2 | 2 |
| rs2253705  | 31008073 | SFTPG  | 2 | 2 | 2 | 2 | 2 |
| rs3131786  | 31009851 | SFTPG  | 0 | 0 | 1 | 0 | 0 |
| rs2844650  | 31010512 | SFTPG  | 2 | 2 | 2 | 2 | 2 |
| rs3132571  | 31013292 | SFTPG  | 0 | 0 | 1 | 0 | 0 |
| rs6933400  | 31015155 | SFTPG  | 2 | 2 | 2 | 2 | 2 |
| rs2517451  | 31022730 | DPCR1  | 2 | 2 | 2 | 2 | 2 |
| rs3130782  | 31022822 | DPCR1  | 0 | 0 | 1 | 0 | 0 |
| rs2247178  | 31024697 | DPCR1  | 2 | 2 | 2 | 2 | 2 |
| rs11970154 | 31027857 | DPCR1  | 2 | 2 | 2 | 2 | 2 |
| rs3132580  | 31028103 | DPCR1  | 0 | 0 | 1 | 0 | 0 |
| rs2240804  | 31028869 | DPCR1  | 2 | 2 | 1 | 2 | 2 |
| rs2240803  | 31028936 | DPCR1  | 2 | 2 | 2 | 2 | 2 |
| rs3757340  | 31029861 | DPCR1  | 2 | 2 | 2 | 2 | 2 |
| rs3131934  | 31039823 | DPCR1  | 0 | 0 | 1 | 0 | 0 |
| rs3131783  | 31040047 | DPCR1  | 0 | 0 | 1 | 0 | 0 |
| rs2844697  | 31040288 | DPCR1  | 0 | 0 | 1 | 0 | 0 |
| rs3095150  | 31040511 | DPCR1  | 2 | 2 | 2 | 2 | 2 |
| rs2532924  | 31040661 | DPCR1  | 2 | 2 | 1 | 2 | 2 |
| rs2530715  | 31041496 | DPCR1  | 2 | 2 | 2 | 2 | 2 |
| rs3095089  | 31041773 | DPCR1  | 0 | 0 | 1 | 0 | 0 |
| rs2532919  | 31041954 | DPCR1  | 2 | 2 | 2 | 2 | 2 |

|            |          |          |   |   |   |   |   |
|------------|----------|----------|---|---|---|---|---|
| rs3132579  | 31048968 | C6orf205 | 0 | 0 | 1 | 0 | 0 |
| rs2844688  | 31050263 | C6orf205 | 2 | 2 | 2 | 2 | 2 |
| rs2517439  | 31050908 | C6orf205 | 2 | 2 | 2 | 2 | 2 |
| rs2844682  | 31054127 | C6orf205 | 2 | 2 | 2 | 2 | 2 |
| rs2844680  | 31054475 | C6orf205 | 2 | 2 | 1 | 2 | 2 |
| rs2517424  | 31057975 | C6orf205 | 2 | 2 | 2 | 2 | 2 |
| rs6918439  | 31059757 | C6orf205 | 2 | 2 | 2 | 2 | 2 |
| rs1634731  | 31063660 | C6orf205 | 2 | 2 | 2 | 2 | 2 |
| rs2517415  | 31064758 | C6orf205 | 2 | 2 | 2 | 2 | 2 |
| rs886403   | 31065597 | C6orf205 | 0 | 0 | 1 | 0 | 0 |
| rs3873342  | 31065745 | C6orf205 | 2 | 2 | 2 | 2 | 2 |
| rs2844673  | 31069905 | C6orf205 | 2 | 2 | 2 | 2 | 2 |
| rs2517409  | 31072372 | C6orf205 | 2 | 2 | 2 | 2 | 2 |
| rs2252926  | 31074283 | C6orf205 | 2 | 2 | 2 | 2 | 2 |
| rs2517408  | 31074432 | C6orf205 | 2 | 2 | 2 | 2 | 2 |
| rs2530690  | 31075181 | C6orf205 | 2 | 2 | 2 | 2 | 2 |
| rs11964080 | 31078949 | C6orf205 | 2 | 2 | 2 | 2 | 2 |
| rs1634717  | 31080568 | C6orf205 | 0 | 0 | 1 | 0 | 0 |
| rs1634718  | 31080844 | C6orf205 | 0 | 0 | 1 | 0 | 0 |
| rs3869095  | 31087994 | C6orf205 | 2 | 2 | 2 | 2 | 2 |
| rs7755364  | 31089694 | C6orf205 | 2 | 2 | 2 | 2 | 2 |
| rs1619376  | 31091305 | C6orf205 | 2 | 2 | 1 | 2 | 2 |
| rs3871466  | 31091662 | C6orf205 | 2 | 2 | 2 | 2 | 2 |
| rs9262495  | 31094506 | C6orf205 | 2 | 2 | 2 | 2 | 2 |
| rs4713411  | 31095155 | C6orf205 | 2 | 2 | 2 | 2 | 2 |
| rs4713412  | 31095190 | C6orf205 | 2 | 2 | 2 | 2 | 2 |
| rs7758976  | 31095765 | C6orf205 | 2 | 2 | 2 | 2 | 2 |
| rs6903912  | 31099538 | C6orf205 | 2 | 2 | 2 | 2 | 2 |
| rs12198448 | 31100325 | C6orf205 | 2 | 2 | 2 | 2 | 2 |
| rs2523898  | 31101512 | C6orf205 | 2 | 2 | 2 | 2 | 2 |
| rs4713420  | 31101546 | C6orf205 | 2 | 2 | 2 | 2 | 2 |
| rs12179536 | 31101569 | C6orf205 | 2 | 2 | 1 | 2 | 2 |
| rs2523897  | 31101937 | C6orf205 | 2 | 2 | 2 | 2 | 2 |
| rs9468859  | 31102462 | C6orf205 | 2 | 2 | 2 | 2 | 2 |
| rs12665700 | 31104111 | C6orf205 | 2 | 2 | 2 | 2 | 2 |
| rs11753789 | 31105057 | C6orf205 | 2 | 2 | 2 | 2 | 2 |
| rs9262549  | 31105671 | C6orf205 | 0 | 0 | 0 | 0 | 0 |
| rs6457300  | 31106721 | C6orf205 | 2 | 2 | 2 | 2 | 2 |
| rs4713422  | 31107881 | C6orf205 | 2 | 2 | 2 | 2 | 2 |
| rs9468862  | 31109334 | C6orf205 | 2 | 2 | 2 | 2 | 2 |
| rs6933349  | 31109992 | C6orf205 | 2 | 2 | 2 | 2 | 2 |
| rs4248154  | 31110595 | C6orf205 | 2 | 2 | 2 | 2 | 2 |
| rs2844670  | 31113705 | C6orf205 | 2 | 2 | 2 | 2 | 2 |
| rs2844665  | 31114834 | C6orf205 | 2 | 2 | 2 | 2 | 2 |
| rs2517552  | 31115569 | C6orf205 | 2 | 2 | 2 | 2 | 2 |
| rs2517545  | 31117281 | C6orf205 | 2 | 2 | 2 | 2 | 2 |
| rs2508015  | 31118179 | C6orf205 | 0 | 0 | 0 | 0 | 0 |

|            |          |          |   |   |   |   |   |
|------------|----------|----------|---|---|---|---|---|
| rs12528584 | 31119824 | C6orf205 | 2 | 2 | 2 | 2 | 2 |
| rs2523870  | 31122095 | C6orf205 | 2 | 2 | 2 | 2 | 2 |
| rs2844645  | 31123161 | C6orf205 | 0 | 0 | 0 | 0 | 0 |
| rs2517532  | 31126386 | C6orf15  | 2 | 2 | 2 | 2 | 2 |
| rs2523864  | 31126525 | C6orf15  | 0 | 0 | 0 | 0 | 0 |
| rs4713429  | 31128996 | C6orf15  | 2 | 2 | 2 | 2 | 2 |
| rs3873352  | 31130092 | C6orf15  | 2 | 2 | 2 | 2 | 2 |
| rs7744253  | 31131503 | C6orf15  | 2 | 2 | 2 | 2 | 2 |
| rs3764808  | 31132652 | C6orf15  | 2 | 2 | 2 | 2 | 2 |
| rs2523849  | 31133030 | C6orf15  | 2 | 2 | 2 | 2 | 2 |
| rs9262636  | 31133827 | C6orf15  | 2 | 2 | 2 | 2 | 2 |
| rs2517521  | 31135315 | C6orf15  | 2 | 2 | 2 | 2 | 2 |
| rs2428514  | 31135495 | C6orf15  | 2 | 2 | 2 | 2 | 2 |
| rs2523841  | 31138262 | C6orf15  | 2 | 2 | 2 | 2 | 2 |
| rs2517500  | 31141488 | C6orf15  | 2 | 2 | 2 | 2 | 2 |
| rs4610604  | 31142214 | C6orf15  | 2 | 2 | 2 | 2 | 2 |
| rs2523881  | 31150587 | C6orf15  | 2 | 2 | 2 | 2 | 2 |
| rs2106067  | 31156242 | C6orf15  | 2 | 2 | 2 | 2 | 2 |
| rs6941772  | 31156895 | C6orf15  | 2 | 2 | 2 | 2 | 2 |
| rs9380215  | 31157634 | C6orf15  | 2 | 2 | 2 | 2 | 2 |
| rs2517471  | 31160077 | C6orf15  | 2 | 2 | 2 | 2 | 2 |
| rs2535315  | 31160106 | C6orf15  | 2 | 2 | 2 | 2 | 2 |
| rs2535311  | 31160663 | C6orf15  | 2 | 2 | 2 | 2 | 2 |
| rs2535310  | 31161236 | C6orf15  | 2 | 2 | 2 | 2 | 2 |
| rs3130955  | 31162490 | C6orf15  | 0 | 0 | 0 | 0 | 0 |
| rs2535304  | 31162666 | C6orf15  | 2 | 2 | 2 | 2 | 2 |
| rs4947296  | 31166157 | C6orf15  | 2 | 2 | 2 | 2 | 2 |
| rs3130544  | 31166319 | C6orf15  | 0 | 0 | 0 | 0 | 0 |
| rs2517452  | 31168141 | C6orf15  | 2 | 2 | 2 | 2 | 2 |
| rs2517448  | 31170646 | C6orf15  | 2 | 2 | 2 | 2 | 2 |
| rs2535289  | 31171212 | C6orf15  | 2 | 2 | 2 | 2 | 2 |
| rs2517403  | 31174988 | C6orf15  | 0 | 0 | 0 | 0 | 0 |
| rs4713433  | 31176005 | C6orf15  | 2 | 2 | 2 | 2 | 2 |
| rs7381697  | 31176005 | C6orf15  | 2 | 2 | 2 | 2 | 2 |
| rs6457327  | 31182009 | C6orf15  | 2 | 2 | 2 | 2 | 2 |
| rs2517484  | 31182108 | C6orf15  | 0 | 0 | 0 | 0 | 0 |
| rs1064191  | 31183354 | C6orf15  | 2 | 2 | 2 | 2 | 2 |
| rs2844635  | 31183460 | C6orf15  | 0 | 0 | 0 | 0 | 0 |
| rs2517529  | 31184957 | C6orf15  | 0 | 0 | 0 | 0 | 0 |
| rs2233984  | 31187243 | C6orf15  | 2 | 2 | 2 | 2 | 2 |
| rs2233974  | 31187995 | C6orf15  | 0 | 0 | 0 | 0 | 0 |
| rs2270190  | 31188565 | C6orf15  | 2 | 2 | 2 | 2 | 2 |
| rs2233965  | 31188878 | C6orf15  | 2 | 2 | 2 | 2 | 2 |
| rs2233956  | 31189184 | C6orf15  | 0 | 0 | 0 | 0 | 0 |
| rs1265048  | 31189388 | C6orf15  | 2 | 2 | 2 | 2 | 2 |
| rs3130977  | 31189968 | PSORS1C1 | 0 | 0 | 0 | 0 | 0 |
| rs3130552  | 31190106 | PSORS1C1 | 0 | 0 | 0 | 0 | 0 |

|           |          |          |   |   |   |   |   |
|-----------|----------|----------|---|---|---|---|---|
| rs6917517 | 31190340 | PSORS1C1 | 2 | 2 | 2 | 2 | 2 |
| rs1042141 | 31191445 | PSORS1C1 | 2 | 2 | 2 | 2 | 2 |
| rs3130981 | 31191792 | CDSN     | 2 | 2 | 2 | 2 | 2 |
| rs3094216 | 31192027 | CDSN     | 0 | 0 | 0 | 0 | 0 |
| rs1042127 | 31192149 | CDSN     | 2 | 2 | 2 | 2 | 2 |
| rs1062470 | 31192414 | CDSN     | 2 | 2 | 2 | 2 | 2 |
| rs4713436 | 31192618 | CDSN     | 2 | 2 | 2 | 2 | 2 |
| rs707913  | 31192766 | CDSN     | 2 | 2 | 2 | 2 | 2 |
| rs3094212 | 31193749 | CDSN     | 2 | 2 | 2 | 2 | 2 |
| rs3132550 | 31194027 | CDSN     | 0 | 0 | 0 | 0 | 0 |
| rs3094211 | 31194381 | CDSN     | 2 | 2 | 2 | 2 | 2 |
| rs2239519 | 31196835 | CDSN     | 2 | 2 | 2 | 2 | 2 |
| rs2239523 | 31197486 | CDSN     | 2 | 2 | 2 | 2 | 2 |
| rs3095314 | 31197610 | CDSN     | 0 | 0 | 0 | 0 | 0 |
| rs3095313 | 31198578 | CDSN     | 2 | 2 | 2 | 2 | 2 |
| rs3094205 | 31199841 | PSORS1C1 | 2 | 2 | 2 | 2 | 2 |
| rs3094204 | 31199971 | PSORS1C1 | 2 | 2 | 2 | 2 | 2 |
| rs3095307 | 31200028 | PSORS1C1 | 2 | 2 | 2 | 2 | 2 |
| rs3778638 | 31200103 | PSORS1C1 | 2 | 2 | 2 | 2 | 2 |
| rs3095302 | 31201045 | PSORS1C1 | 2 | 2 | 2 | 2 | 2 |
| rs3131003 | 31201461 | PSORS1C1 | 2 | 2 | 2 | 2 | 2 |
| rs3815087 | 31201566 | PSORS1C1 | 2 | 2 | 2 | 2 | 2 |
| rs3130559 | 31205280 | PSORS1C1 | 2 | 2 | 2 | 2 | 2 |
| rs3131009 | 31206811 | PSORS1C1 | 2 | 2 | 2 | 2 | 2 |
| rs3823418 | 31208921 | PSORS1C1 | 2 | 2 | 2 | 2 | 2 |
| rs4084091 | 31209380 | PSORS1C2 | 2 | 2 | 2 | 2 | 2 |
| rs3130564 | 31209653 | PSORS1C2 | 0 | 0 | 0 | 0 | 0 |
| rs1265100 | 31213289 | PSORS1C2 | 2 | 2 | 2 | 2 | 2 |
| rs1265099 | 31213392 | PSORS1C2 | 0 | 0 | 0 | 0 | 0 |
| rs2074478 | 31213612 | PSORS1C2 | 2 | 2 | 2 | 2 | 2 |
| rs2233952 | 31213870 | PSORS1C2 | 2 | 2 | 2 | 2 | 2 |
| rs3130573 | 31214247 | PSORS1C1 | 0 | 0 | 0 | 0 | 0 |
| rs3094663 | 31215066 | PSORS1C2 | 2 | 2 | 2 | 2 | 2 |
| rs1966    | 31215712 | PSORS1C1 | 2 | 2 | 2 | 2 | 2 |
| rs1265087 | 31217789 | CCHCR1   | 0 | 0 | 0 | 0 | 0 |
| rs1265086 | 31217861 | CCHCR1   | 0 | 0 | 0 | 0 | 0 |
| rs1265085 | 31218650 | CCHCR1   | 2 | 2 | 2 | 2 | 2 |
| rs130073  | 31219159 | CCHCR1   | 2 | 2 | 2 | 2 | 2 |
| rs130072  | 31220463 | CCHCR1   | 2 | 2 | 2 | 2 | 2 |
| rs1265078 | 31220581 | CCHCR1   | 0 | 0 | 0 | 0 | 0 |
| rs3094225 | 31221031 | CCHCR1   | 2 | 2 | 2 | 2 | 2 |
| rs1265074 | 31221193 | CCHCR1   | 2 | 2 | 2 | 2 | 2 |
| rs746647  | 31222161 | CCHCR1   | 0 | 0 | 0 | 0 | 0 |
| rs2240066 | 31222314 | CCHCR1   | 2 | 2 | 2 | 2 | 2 |
| rs2240064 | 31222552 | CCHCR1   | 2 | 2 | 2 | 2 | 2 |
| rs3131012 | 31223420 | CCHCR1   | 2 | 2 | 2 | 2 | 2 |
| rs1265115 | 31225054 | CCHCR1   | 2 | 2 | 2 | 2 | 2 |

|           |          |        |   |   |   |   |   |
|-----------|----------|--------|---|---|---|---|---|
| rs1265112 | 31225998 | CCHCR1 | 0 | 0 | 0 | 0 | 0 |
| rs130067  | 31226490 | CCHCR1 | 2 | 2 | 2 | 2 | 2 |
| rs130078  | 31226544 | CCHCR1 | 2 | 2 | 2 | 2 | 2 |
| rs1265110 | 31227401 | CCHCR1 | 2 | 2 | 2 | 2 | 2 |
| rs1265109 | 31227568 | CCHCR1 | 2 | 2 | 2 | 2 | 2 |
| rs130077  | 31230309 | CCHCR1 | 2 | 2 | 2 | 2 | 2 |
| rs130065  | 31230479 | CCHCR1 | 0 | 0 | 0 | 0 | 0 |
| rs2073716 | 31230976 | CCHCR1 | 2 | 2 | 2 | 2 | 2 |
| rs3130453 | 31232828 | CCHCR1 | 2 | 2 | 2 | 2 | 2 |
| rs2239524 | 31233548 | CCHCR1 | 2 | 2 | 2 | 2 | 2 |
| rs720465  | 31233756 | CCHCR1 | 0 | 0 | 0 | 0 | 1 |
| rs3130456 | 31234231 | CCHCR1 | 2 | 2 | 2 | 2 | 2 |
| rs3094187 | 31234923 | TCF19  | 2 | 2 | 2 | 2 | 2 |
| rs1150765 | 31235541 | TCF19  | 0 | 0 | 0 | 0 | 0 |
| rs7750641 | 31237289 | TCF19  | 0 | 0 | 0 | 0 | 0 |
| rs2073724 | 31237686 | TCF19  | 2 | 2 | 2 | 2 | 2 |
| rs1065461 | 31238481 | TCF19  | 2 | 2 | 2 | 2 | 2 |
| rs1419881 | 31238572 | TCF19  | 2 | 2 | 2 | 2 | 2 |
| rs3130933 | 31240064 | POU5F1 | 2 | 2 | 2 | 2 | 2 |
| rs13409   | 31240119 | POU5F1 | 0 | 0 | 0 | 0 | 0 |
| rs2106074 | 31241488 | POU5F1 | 2 | 2 | 2 | 2 | 2 |
| rs3130931 | 31242867 | POU5F1 | 2 | 2 | 2 | 2 | 2 |
| rs3130501 | 31244432 | POU5F1 | 2 | 2 | 2 | 2 | 2 |
| rs3132524 | 31244693 | POU5F1 | 2 | 2 | 2 | 2 | 2 |
| rs3130503 | 31245144 | POU5F1 | 2 | 2 | 2 | 2 | 2 |
| rs879882  | 31247431 | POU5F1 | 2 | 2 | 2 | 2 | 2 |
| rs1265159 | 31248026 | POU5F1 | 0 | 0 | 0 | 0 | 0 |
| rs885948  | 31248511 | POU5F1 | 2 | 2 | 2 | 2 | 2 |
| rs1265158 | 31248720 | POU5F1 | 0 | 0 | 0 | 0 | 0 |
| rs887468  | 31249502 | POU5F1 | 0 | 0 | 0 | 0 | 0 |
| rs3094188 | 31250224 | POU5F1 | 2 | 2 | 2 | 2 | 2 |
| rs1265156 | 31250276 | POU5F1 | 2 | 2 | 2 | 2 | 2 |
| rs887466  | 31251490 | POU5F1 | 2 | 2 | 2 | 2 | 2 |
| rs3131018 | 31251561 | POU5F1 | 2 | 2 | 2 | 2 | 2 |
| rs915660  | 31251814 | POU5F1 | 2 | 2 | 2 | 2 | 2 |
| rs3868542 | 31253818 | POU5F1 | 2 | 2 | 2 | 2 | 2 |
| rs887464  | 31253899 | POU5F1 | 2 | 2 | 2 | 2 | 2 |
| rs3871248 | 31253970 | POU5F1 | 2 | 2 | 2 | 2 | 2 |
| rs1052989 | 31254382 | POU5F1 | 2 | 2 | 2 | 2 | 2 |
| rs4713438 | 31254825 | POU5F1 | 2 | 2 | 2 | 2 | 2 |
| rs3130457 | 31255173 | POU5F1 | 0 | 0 | 0 | 0 | 0 |
| rs1265181 | 31263764 | HCG27  | 0 | 0 | 0 | 0 | 0 |
| rs9295957 | 31265572 | HCG27  | 2 | 2 | 2 | 2 | 2 |
| rs4713447 | 31270942 | HCG27  | 2 | 2 | 2 | 2 | 2 |
| rs3094609 | 31273545 | HCG27  | 2 | 2 | 2 | 2 | 2 |
| rs3868075 | 31275794 | HCG27  | 2 | 2 | 2 | 2 | 2 |
| rs4122189 | 31275906 | HCG27  | 2 | 2 | 2 | 2 | 2 |

|            |          |       |   |   |   |   |   |
|------------|----------|-------|---|---|---|---|---|
| rs9263870  | 31278493 | HCG27 | 2 | 2 | 2 | 2 | 2 |
| rs9263871  | 31278507 | HCG27 | 2 | 2 | 2 | 2 | 2 |
| rs9263873  | 31278692 | HCG27 | 2 | 2 | 2 | 2 | 2 |
| rs2894181  | 31282506 | HCG27 | 2 | 2 | 2 | 2 | 2 |
| rs7451190  | 31282506 | HCG27 | 2 | 2 | 2 | 2 | 2 |
| rs7451258  | 31282569 | HCG27 | 2 | 2 | 2 | 2 | 2 |
| rs3887152  | 31284314 | HCG27 | 2 | 2 | 2 | 2 | 2 |
| rs4351302  | 31284900 | HCG27 | 2 | 2 | 2 | 2 | 2 |
| rs7452908  | 31284900 | HCG27 | 2 | 2 | 2 | 2 | 2 |
| rs3869109  | 31292175 | HCG27 | 0 | 0 | 0 | 0 | 0 |
| rs9501522  | 31292404 | HCG27 | 2 | 2 | 2 | 2 | 2 |
| rs9263964  | 31294018 | HCG27 | 0 | 0 | 0 | 0 | 0 |
| rs3130467  | 31295054 | HCG27 | 0 | 0 | 0 | 0 | 0 |
| rs1345274  | 31298606 | HCG27 | 2 | 2 | 2 | 2 | 2 |
| rs12662501 | 31298829 | HCG27 | 2 | 2 | 2 | 2 | 2 |
| rs6904669  | 31300775 | HCG27 | 2 | 2 | 2 | 2 | 2 |
| rs6928399  | 31303197 | HCG27 | 2 | 2 | 2 | 2 | 2 |
| rs3134782  | 31305612 | HCG27 | 2 | 2 | 2 | 2 | 2 |
| rs3130473  | 31307187 | HCG27 | 0 | 0 | 0 | 0 | 0 |
| rs11967684 | 31307745 | HCG27 | 2 | 2 | 2 | 2 | 2 |
| rs7745906  | 31311987 | HCG27 | 2 | 2 | 2 | 2 | 2 |
| rs6457350  | 31312088 | HCG27 | 2 | 2 | 2 | 2 | 2 |
| rs3869115  | 31312673 | HCG27 | 2 | 2 | 2 | 2 | 2 |
| rs3130685  | 31314185 | HLA-C | 0 | 0 | 0 | 0 | 0 |
| rs3134768  | 31314823 | HLA-C | 0 | 0 | 0 | 0 | 0 |
| rs3095250  | 31316319 | HLA-C | 2 | 2 | 2 | 2 | 2 |
| rs3130712  | 31317489 | HLA-C | 2 | 2 | 2 | 2 | 2 |
| rs3130425  | 31326306 | HLA-C | 2 | 2 | 2 | 2 | 2 |
| rs3095254  | 31329647 | HLA-C | 2 | 2 | 2 | 2 | 2 |
| rs3130542  | 31340090 | HLA-C | 2 | 2 | 2 | 2 | 2 |
| rs2844623  | 31340522 | HLA-C | 2 | 2 | 2 | 2 | 2 |
| rs2394953  | 31341332 | HLA-C | 2 | 2 | 2 | 2 | 2 |
| rs2524094  | 31348020 | HLA-C | 0 | 0 | 0 | 0 | 0 |
| rs2074488  | 31348410 | HLA-C | 2 | 2 | 2 | 2 | 2 |
| rs3132486  | 31351149 | HLA-C | 2 | 2 | 2 | 2 | 2 |
| rs3130696  | 31351863 | HLA-C | 0 | 0 | 0 | 0 | 0 |
| rs2524074  | 31352000 | HLA-C | 0 | 0 | 0 | 0 | 0 |
| rs2524069  | 31352768 | HLA-C | 0 | 0 | 0 | 0 | 0 |
| rs7381988  | 31354682 | HLA-C | 2 | 2 | 2 | 2 | 2 |
| rs7382297  | 31355046 | HLA-C | 2 | 2 | 2 | 2 | 2 |
| rs4386816  | 31355114 | HLA-C | 2 | 2 | 2 | 2 | 2 |
| rs2394963  | 31359441 | HLA-C | 2 | 2 | 2 | 2 | 2 |
| rs9461684  | 31361423 | HLA-C | 2 | 2 | 2 | 2 | 2 |
| rs2853933  | 31362067 | HLA-C | 0 | 0 | 0 | 0 | 0 |
| rs2524044  | 31364732 | HLA-C | 2 | 2 | 2 | 2 | 2 |
| rs2524040  | 31365604 | HLA-C | 0 | 0 | 0 | 0 | 0 |
| rs2256583  | 31366825 | HLA-C | 2 | 2 | 2 | 2 | 2 |



|            |          |       |   |   |   |   |   |
|------------|----------|-------|---|---|---|---|---|
| rs2524163  | 31367558 | HLA-C | 0 | 0 | 0 | 0 | 0 |
| rs2524160  | 31367833 | HLA-C | 2 | 2 | 2 | 2 | 2 |
| rs2243868  | 31369255 | HLA-C | 0 | 0 | 0 | 0 | 0 |
| rs3873379  | 31370148 | HLA-C | 2 | 2 | 2 | 2 | 2 |
| rs3906272  | 31370903 | HLA-C | 2 | 2 | 2 | 2 | 2 |
| rs2853926  | 31371030 | HLA-C | 2 | 2 | 2 | 2 | 2 |
| rs2894207  | 31371730 | HLA-C | 2 | 2 | 2 | 2 | 2 |
| rs2853925  | 31372901 | HLA-C | 2 | 2 | 2 | 2 | 2 |
| rs3905495  | 31373518 | HLA-C | 2 | 2 | 2 | 2 | 2 |
| rs2524089  | 31374501 | HLA-C | 0 | 0 | 0 | 0 | 0 |
| rs9366778  | 31377152 | HLA-C | 2 | 2 | 2 | 2 | 2 |
| rs3915971  | 31377327 | HLA-C | 2 | 2 | 2 | 2 | 2 |
| rs9264869  | 31379609 | HLA-C | 2 | 2 | 2 | 2 | 2 |
| rs6457374  | 31380240 | HLA-C | 0 | 0 | 0 | 0 | 0 |
| rs7760988  | 31381009 | HLA-C | 2 | 2 | 2 | 2 | 2 |
| rs7761965  | 31381474 | HLA-C | 2 | 2 | 2 | 2 | 2 |
| rs3873386  | 31381724 | HLA-C | 2 | 2 | 2 | 2 | 2 |
| rs6931332  | 31382224 | HLA-C | 2 | 2 | 2 | 2 | 2 |
| rs10484554 | 31382534 | HLA-C | 2 | 2 | 2 | 2 | 2 |
| rs2524229  | 31383210 | HLA-C | 2 | 2 | 2 | 2 | 2 |
| rs7755852  | 31385967 | HLA-C | 2 | 2 | 2 | 2 | 2 |
| rs9265797  | 31416609 | HLA-B | 0 | 0 | 0 | 0 | 0 |
| rs3134792  | 31420305 | HLA-B | 9 | 9 | 9 | 9 | 9 |
| rs7453967  | 31422222 | HLA-B | 2 | 2 | 2 | 2 | 2 |
| rs2923006  | 31425078 | HLA-B | 2 | 2 | 2 | 2 | 2 |
| rs2156875  | 31425326 | HLA-B | 2 | 2 | 2 | 2 | 2 |
| rs2844586  | 31426003 | HLA-B | 2 | 2 | 2 | 2 | 2 |
| rs2523619  | 31426123 | HLA-B | 2 | 2 | 2 | 2 | 2 |
| rs2442719  | 31428517 | HLA-B | 2 | 2 | 2 | 2 | 2 |
| rs2596503  | 31428789 | HLA-B | 2 | 2 | 2 | 2 | 2 |
| rs2596501  | 31429190 | HLA-B | 2 | 2 | 2 | 2 | 2 |
| rs1058026  | 31429664 | HLA-B | 2 | 2 | 2 | 2 | 2 |
| rs3819294  | 31430466 | HLA-B | 2 | 2 | 2 | 2 | 2 |
| rs2523608  | 31430538 | HLA-B | 2 | 2 | 2 | 2 | 2 |
| rs2523589  | 31435313 | HLA-B | 2 | 2 | 2 | 2 | 2 |
| rs2523554  | 31439808 | HLA-B | 0 | 0 | 0 | 0 | 0 |
| rs2596551  | 31440218 | HLA-B | 2 | 2 | 2 | 2 | 2 |
| rs2844580  | 31441282 | HLA-B | 0 | 0 | 0 | 0 | 0 |
| rs2596574  | 31442153 | HLA-B | 2 | 2 | 2 | 2 | 2 |
| rs2844575  | 31442924 | HLA-B | 2 | 2 | 2 | 2 | 9 |
| rs2844573  | 31443433 | HLA-B | 0 | 0 | 0 | 0 | 0 |
| rs7743761  | 31444079 | HLA-B | 2 | 2 | 2 | 2 | 2 |
| rs2523535  | 31444229 | HLA-B | 0 | 0 | 0 | 0 | 0 |
| rs2253907  | 31444849 | HLA-B | 2 | 2 | 2 | 2 | 2 |
| rs2596438  | 31447850 | HLA-B | 2 | 2 | 2 | 2 | 2 |
| rs2394990  | 31448538 | HLA-B | 2 | 2 | 2 | 2 | 2 |
| rs2254556  | 31450610 | HLA-B | 2 | 2 | 2 | 2 | 2 |

|            |          |       |   |   |   |   |   |
|------------|----------|-------|---|---|---|---|---|
| rs6933050  | 31451611 | HLA-B | 2 | 2 | 2 | 2 | 2 |
| rs2507983  | 31453773 | HLA-B | 2 | 2 | 2 | 2 | 2 |
| rs2442738  | 31454393 | HLA-B | 2 | 2 | 2 | 2 | 2 |
| rs2844542  | 31455253 | HLA-B | 0 | 0 | 0 | 0 | 0 |
| rs9266722  | 31457901 | MICA  | 2 | 2 | 2 | 2 | 2 |
| rs2844535  | 31458282 | MICA  | 0 | 0 | 0 | 9 | 0 |
| rs1521     | 31458683 | MICA  | 2 | 2 | 2 | 2 | 2 |
| rs2844533  | 31458781 | MICA  | 2 | 2 | 2 | 2 | 2 |
| rs2442752  | 31459743 | MICA  | 0 | 0 | 0 | 0 | 0 |
| rs6903496  | 31460753 | MICA  | 2 | 2 | 2 | 2 | 2 |
| rs2844529  | 31461572 | MICA  | 2 | 2 | 2 | 2 | 2 |
| rs2428486  | 31462083 | MICA  | 2 | 2 | 2 | 2 | 2 |
| rs13437082 | 31462539 | MICA  | 2 | 2 | 2 | 2 | 2 |
| rs4711269  | 31462798 | MICA  | 2 | 2 | 2 | 2 | 2 |
| rs2596560  | 31463297 | MICA  | 0 | 0 | 0 | 0 | 0 |
| rs2523480  | 31463681 | MICA  | 2 | 2 | 2 | 2 | 2 |
| rs2853969  | 31464553 | MICA  | 2 | 2 | 2 | 2 | 2 |
| rs9266791  | 31466922 | MICA  | 2 | 2 | 2 | 2 | 2 |
| rs2523477  | 31468368 | MICA  | 2 | 2 | 2 | 2 | 2 |
| rs2523467  | 31470909 | MICA  | 2 | 2 | 2 | 2 | 2 |
| rs2251396  | 31472686 | MICA  | 0 | 0 | 0 | 0 | 0 |
| rs2523452  | 31476519 | MICA  | 2 | 2 | 2 | 2 | 2 |
| rs2523451  | 31477130 | MICA  | 0 | 0 | 0 | 0 | 0 |
| rs9380254  | 31486314 | MICA  | 2 | 2 | 2 | 2 | 2 |
| rs1051794  | 31487088 | MICA  | 2 | 2 | 2 | 2 | 2 |
| rs1131896  | 31487094 | MICA  | 2 | 2 | 2 | 2 | 2 |
| rs2256028  | 31487177 | MICA  | 2 | 2 | 2 | 2 | 2 |
| rs3828881  | 31487528 | MICA  | 2 | 2 | 2 | 2 | 2 |
| rs9266825  | 31490861 | MICA  | 2 | 2 | 2 | 2 | 2 |
| rs2848713  | 31492458 | MICA  | 2 | 2 | 2 | 2 | 2 |
| rs2848716  | 31495946 | MICA  | 2 | 2 | 2 | 2 | 2 |
| rs2844513  | 31496193 | MICA  | 2 | 2 | 2 | 2 | 2 |
| rs2844511  | 31497763 | MICA  | 2 | 2 | 2 | 2 | 2 |
| rs2524279  | 31500885 | MICA  | 2 | 2 | 2 | 2 | 2 |
| rs7772549  | 31515622 | HCP5  | 2 | 2 | 2 | 2 | 2 |
| rs6915220  | 31515800 | HCP5  | 2 | 2 | 2 | 2 | 2 |
| rs9469003  | 31515807 | HCP5  | 2 | 2 | 2 | 2 | 2 |
| rs2524276  | 31516244 | HCP5  | 2 | 2 | 2 | 2 | 2 |
| rs2596464  | 31520940 | HCP5  | 2 | 2 | 2 | 2 | 2 |
| rs2516464  | 31524135 | HCP5  | 2 | 2 | 2 | 2 | 2 |
| rs3128982  | 31525170 | HCP5  | 0 | 0 | 0 | 0 | 0 |
| rs2523693  | 31526103 | HCP5  | 2 | 2 | 2 | 2 | 2 |
| rs2516436  | 31527856 | HCP5  | 2 | 2 | 2 | 2 | 2 |
| rs2596480  | 31533964 | HCP5  | 2 | 2 | 2 | 2 | 2 |
| rs2596472  | 31536946 | HCP5  | 2 | 2 | 2 | 2 | 2 |
| rs2596473  | 31538778 | HCP5  | 2 | 2 | 2 | 2 | 2 |
| rs2395029  | 31539759 | HCP5  | 2 | 2 | 2 | 2 | 2 |

|            |          |      |   |   |   |   |   |
|------------|----------|------|---|---|---|---|---|
| rs2284178  | 31540104 | HCP5 | 2 | 2 | 2 | 2 | 2 |
| rs2244546  | 31543812 | HCP5 | 2 | 2 | 2 | 2 | 2 |
| rs2859448  | 31544252 | HCP5 | 2 | 2 | 2 | 2 | 2 |
| rs2844508  | 31544478 | HCP5 | 2 | 2 | 2 | 2 | 2 |
| rs2523674  | 31544768 | HCP5 | 0 | 0 | 0 | 0 | 0 |
| rs2395031  | 31545284 | HCP5 | 2 | 2 | 2 | 2 | 2 |
| rs2244839  | 31546347 | HCP5 | 2 | 2 | 2 | 2 | 2 |
| rs2596449  | 31546369 | HCP5 | 2 | 2 | 2 | 2 | 2 |
| rs7758090  | 31546773 | HCP5 | 2 | 2 | 2 | 2 | 2 |
| rs2844505  | 31547042 | HCP5 | 2 | 2 | 2 | 2 | 2 |
| rs1055569  | 31548061 | HCP5 | 2 | 2 | 2 | 2 | 2 |
| rs2516440  | 31548476 | HCP5 | 2 | 2 | 2 | 2 | 2 |
| rs6940467  | 31550116 | HCP5 | 2 | 2 | 2 | 2 | 2 |
| rs3131643  | 31550761 | HCP5 | 0 | 0 | 0 | 0 | 0 |
| rs12660382 | 31551302 | HCP5 | 2 | 2 | 2 | 2 | 2 |
| rs2523656  | 31552027 | HCP5 | 2 | 2 | 2 | 2 | 2 |
| rs2395488  | 31553888 | HCP5 | 0 | 0 | 0 | 0 | 0 |
| rs2248372  | 31554445 | HCP5 | 2 | 2 | 2 | 2 | 2 |
| rs2248462  | 31554775 | HCP5 | 2 | 2 | 2 | 2 | 2 |
| rs2596536  | 31555827 | HCP5 | 0 | 0 | 0 | 0 | 0 |
| rs2516424  | 31556294 | HCP5 | 0 | 0 | 0 | 0 | 0 |
| rs3828893  | 31556632 | HCP5 | 2 | 2 | 2 | 2 | 2 |
| rs3099844  | 31556955 | HCP5 | 0 | 0 | 0 | 0 | 0 |
| rs2904776  | 31557060 | HCP5 | 2 | 2 | 2 | 2 | 2 |
| rs2523647  | 31557757 | MICB | 2 | 2 | 2 | 2 | 2 |
| rs2516509  | 31557973 | MICB | 2 | 2 | 2 | 2 | 2 |
| rs2905747  | 31559455 | MICB | 2 | 2 | 2 | 2 | 2 |
| rs2904781  | 31565396 | MICB | 2 | 2 | 2 | 2 | 2 |
| rs3130922  | 31569068 | MICB | 2 | 2 | 2 | 2 | 2 |
| rs3828901  | 31571697 | MICB | 2 | 2 | 2 | 2 | 2 |
| rs3828903  | 31572718 | MICB | 2 | 2 | 2 | 2 | 2 |
| rs2534673  | 31573469 | MICB | 0 | 0 | 0 | 0 | 0 |
| rs7383312  | 31576525 | MICB | 2 | 2 | 2 | 2 | 2 |
| rs9267404  | 31578524 | MICB | 2 | 2 | 2 | 2 | 2 |
| rs2855812  | 31580699 | MICB | 0 | 0 | 0 | 0 | 0 |
| rs3131635  | 31584113 | MICB | 2 | 2 | 2 | 2 | 2 |
| rs2844498  | 31584833 | MICB | 2 | 2 | 2 | 2 | 2 |
| rs3132464  | 31585440 | MICB | 2 | 2 | 2 | 2 | 2 |
| rs2246618  | 31586965 | MICB | 0 | 0 | 0 | 0 | 0 |
| rs2246626  | 31587105 | MICB | 2 | 2 | 2 | 2 | 2 |
| rs3095229  | 31588251 | MICB | 2 | 2 | 2 | 2 | 2 |
| rs6457443  | 31588377 | MICB | 2 | 2 | 2 | 2 | 2 |
| rs2516400  | 31589084 | MICB | 0 | 0 | 0 | 0 | 1 |
| rs2516399  | 31589278 | MICB | 2 | 2 | 2 | 2 | 2 |
| rs2516398  | 31589505 | MICB | 2 | 2 | 2 | 2 | 2 |
| rs2844494  | 31591394 | MICB | 2 | 2 | 2 | 2 | 2 |
| rs3094000  | 31592033 | MICB | 2 | 2 | 2 | 2 | 2 |

|           |          |          |   |   |   |   |   |
|-----------|----------|----------|---|---|---|---|---|
| rs3130637 | 31596124 | MCCD1    | 2 | 2 | 2 | 2 | 2 |
| rs4959079 | 31596858 | MCCD1    | 2 | 2 | 2 | 2 | 2 |
| rs3132454 | 31597623 | MCCD1    | 2 | 2 | 2 | 2 | 2 |
| rs3093993 | 31598704 | MCCD1    | 2 | 2 | 2 | 2 | 2 |
| rs3095227 | 31598979 | MCCD1    | 2 | 2 | 2 | 2 | 2 |
| rs3093986 | 31601400 | MCCD1    | 2 | 2 | 2 | 2 | 2 |
| rs2259435 | 31604894 | MCCD1    | 2 | 2 | 2 | 2 | 2 |
| rs3093983 | 31604904 | MCCD1    | 2 | 2 | 2 | 2 | 2 |
| rs3130055 | 31605378 | MCCD1    | 2 | 2 | 2 | 2 | 2 |
| rs3093978 | 31606476 | BAT1     | 2 | 2 | 2 | 2 | 2 |
| rs3131628 | 31610746 | BAT1     | 2 | 2 | 2 | 2 | 2 |
| rs2071596 | 31614670 | BAT1     | 2 | 2 | 2 | 2 | 2 |
| rs2516393 | 31614723 | BAT1     | 2 | 2 | 2 | 2 | 2 |
| rs2523512 | 31614780 | BAT1     | 2 | 2 | 2 | 2 | 2 |
| rs2239709 | 31615426 | BAT1     | 2 | 2 | 2 | 2 | 2 |
| rs3130059 | 31617263 | BAT1     | 0 | 0 | 0 | 0 | 0 |
| rs2239528 | 31618084 | BAT1     | 2 | 2 | 2 | 2 | 2 |
| rs2844509 | 31618903 | BAT1     | 2 | 2 | 2 | 2 | 2 |
| rs2071594 | 31620699 | BAT1     | 0 | 0 | 0 | 0 | 0 |
| rs2071593 | 31620778 | ATP6V1G2 | 2 | 2 | 2 | 2 | 2 |
| rs2239705 | 31621381 | ATP6V1G2 | 2 | 2 | 2 | 2 | 2 |
| rs2523503 | 31621538 | ATP6V1G2 | 2 | 2 | 2 | 2 | 2 |
| rs2071591 | 31623778 | NFKBIL1  | 0 | 0 | 0 | 0 | 0 |
| rs3219183 | 31624342 | NFKBIL1  | 2 | 2 | 2 | 2 | 2 |
| rs6916921 | 31628405 | NFKBIL1  | 2 | 2 | 2 | 2 | 2 |
| rs2255798 | 31629281 | NFKBIL1  | 2 | 2 | 2 | 2 | 2 |
| rs6929796 | 31630648 | NFKBIL1  | 2 | 2 | 2 | 2 | 2 |
| rs2857605 | 31632830 | NFKBIL1  | 2 | 2 | 2 | 2 | 2 |
| rs2239707 | 31633298 | NFKBIL1  | 2 | 2 | 2 | 2 | 2 |
| rs2230365 | 31633427 | NFKBIL1  | 2 | 2 | 2 | 2 | 2 |
| rs4947324 | 31636109 | NFKBIL1  | 2 | 2 | 2 | 2 | 2 |
| rs7762619 | 31639289 | NFKBIL1  | 2 | 2 | 2 | 2 | 2 |
| rs2844484 | 31644203 | LTA      | 2 | 2 | 2 | 2 | 2 |
| rs2516312 | 31647414 | LTA      | 2 | 2 | 2 | 2 | 2 |
| rs2844482 | 31647746 | LTA      | 2 | 2 | 2 | 2 | 2 |
| rs2229094 | 31648535 | LTA      | 2 | 2 | 2 | 2 | 2 |
| rs2857713 | 31648535 | LTA      | 2 | 2 | 2 | 2 | 2 |
| rs2229092 | 31648736 | LTA      | 2 | 2 | 2 | 2 | 2 |
| rs1041981 | 31648763 | LTA      | 0 | 0 | 0 | 0 | 0 |
| rs1799964 | 31650287 | LTA      | 2 | 2 | 2 | 2 | 2 |
| rs1800629 | 31651010 | TNF      | 0 | 0 | 0 | 0 | 0 |
| rs2228088 | 31651584 | TNF      | 2 | 2 | 2 | 2 | 2 |
| rs3093661 | 31651737 | TNF      | 2 | 2 | 2 | 2 | 2 |
| rs3093662 | 31652168 | TNF      | 2 | 2 | 2 | 2 | 2 |
| rs4645843 | 31652541 | TNF      | 2 | 2 | 2 | 2 | 2 |
| rs3093559 | 31655771 | LTB      | 2 | 2 | 2 | 2 | 2 |
| rs3093553 | 31657535 | LTB      | 2 | 2 | 2 | 2 | 2 |

|            |          |         |   |   |   |   |   |
|------------|----------|---------|---|---|---|---|---|
| rs2256965  | 31663109 | LST1    | 2 | 2 | 2 | 2 | 2 |
| rs986475   | 31664688 | NCR3    | 2 | 2 | 2 | 2 | 2 |
| rs2515920  | 31670594 | NCR3    | 2 | 2 | 2 | 2 | 2 |
| rs2844480  | 31672800 | NCR3    | 2 | 2 | 2 | 2 | 2 |
| rs2857596  | 31675401 | NCR3    | 2 | 2 | 2 | 2 | 2 |
| rs2857595  | 31676448 | NCR3    | 0 | 0 | 0 | 0 | 0 |
| rs2844479  | 31680935 | AIF1    | 2 | 2 | 2 | 2 | 2 |
| rs3132451  | 31690004 | AIF1    | 0 | 0 | 0 | 0 | 0 |
| rs2269475  | 31691910 | AIF1    | 2 | 2 | 2 | 2 | 2 |
| rs2736176  | 31695540 | BAT2    | 2 | 2 | 2 | 2 | 2 |
| rs2857694  | 31695849 | BAT2    | 2 | 2 | 2 | 2 | 2 |
| rs2857693  | 31696363 | BAT2    | 2 | 2 | 2 | 2 | 2 |
| rs2844472  | 31697655 | BAT2    | 2 | 2 | 2 | 2 | 2 |
| rs3130622  | 31700503 | BAT2    | 0 | 0 | 0 | 0 | 0 |
| rs2260000  | 31701455 | BAT2    | 2 | 2 | 2 | 2 | 2 |
| rs3130071  | 31702607 | BAT2    | 2 | 2 | 2 | 2 | 2 |
| rs2736171  | 31703466 | BAT2    | 2 | 2 | 2 | 2 | 2 |
| rs2242660  | 31705732 | BAT2    | 0 | 0 | 0 | 0 | 0 |
| rs2736161  | 31706272 | BAT2    | 2 | 2 | 2 | 2 | 2 |
| rs3115663  | 31709822 | BAT2    | 0 | 0 | 0 | 0 | 0 |
| rs1046089  | 31710946 | BAT2    | 0 | 0 | 0 | 0 | 0 |
| rs2261033  | 31711570 | BAT2    | 2 | 2 | 2 | 2 | 2 |
| rs9267522  | 31711749 | BAT2    | 0 | 0 | 0 | 0 | 0 |
| rs3132453  | 31712023 | BAT2    | 2 | 2 | 2 | 2 | 2 |
| rs10885    | 31712570 | BAT2    | 0 | 0 | 0 | 0 | 0 |
| rs2736155  | 31713178 | BAT2    | 2 | 2 | 2 | 2 | 2 |
| rs743400   | 31715090 | BAT3    | 2 | 2 | 2 | 2 | 2 |
| rs1077394  | 31718363 | BAT3    | 2 | 2 | 2 | 2 | 2 |
| rs1077393  | 31718508 | BAT3    | 2 | 2 | 2 | 2 | 2 |
| rs1052486  | 31718665 | BAT3    | 2 | 2 | 2 | 2 | 2 |
| rs2242656  | 31722081 | BAT3    | 2 | 2 | 2 | 2 | 2 |
| rs2844463  | 31723146 | BAT3    | 2 | 2 | 2 | 2 | 2 |
| rs805303   | 31724345 | BAT3    | 0 | 0 | 0 | 0 | 0 |
| rs805301   | 31726100 | BAT3    | 0 | 0 | 0 | 0 | 0 |
| rs3130050  | 31726740 | BAT3    | 2 | 2 | 2 | 2 | 2 |
| rs3117582  | 31728499 | BAT3    | 0 | 0 | 0 | 0 | 0 |
| rs707921   | 31733520 | APOM    | 2 | 2 | 2 | 2 | 2 |
| rs3130617  | 31735502 | C6orf47 | 2 | 2 | 2 | 2 | 2 |
| rs805263   | 31736092 | C6orf47 | 2 | 2 | 2 | 2 | 2 |
| rs805262   | 31736712 | C6orf47 | 2 | 2 | 2 | 2 | 2 |
| rs11965323 | 31737617 | BAT4    | 2 | 2 | 2 | 2 | 2 |
| rs7992     | 31738220 | BAT4    | 2 | 2 | 2 | 2 | 2 |
| rs3130618  | 31740113 | BAT4    | 0 | 0 | 0 | 0 | 0 |
| rs4569     | 31745786 | CSNK2B  | 2 | 2 | 2 | 2 | 2 |
| rs2142234  | 31747108 | CSNK2B  | 2 | 2 | 2 | 2 | 2 |
| rs805267   | 31747736 | LY6G5B  | 2 | 2 | 2 | 2 | 2 |
| rs9267532  | 31747958 | LY6G5B  | 2 | 2 | 2 | 2 | 2 |

|            |          |         |   |   |   |   |   |
|------------|----------|---------|---|---|---|---|---|
| rs2280800  | 31754377 | LY6G5C  | 2 | 2 | 2 | 2 | 2 |
| rs915653   | 31765026 | BAT5    | 2 | 2 | 2 | 2 | 2 |
| rs12199687 | 31768234 | BAT5    | 2 | 2 | 2 | 2 | 2 |
| rs805277   | 31770936 | BAT5    | 2 | 2 | 2 | 2 | 2 |
| rs805274   | 31773173 | BAT5    | 2 | 2 | 2 | 2 | 2 |
| rs1266074  | 31774530 | BAT5    | 2 | 2 | 2 | 2 | 2 |
| rs9267546  | 31781415 | C6orf21 | 2 | 2 | 2 | 2 | 2 |
| rs2242653  | 31783744 | C6orf21 | 2 | 2 | 2 | 2 | 2 |
| rs805285   | 31787444 | LY6G6E  | 2 | 2 | 2 | 2 | 2 |
| rs3749952  | 31791136 | LY6G6D  | 2 | 2 | 2 | 2 | 2 |
| rs805294   | 31796196 | LY6G6C  | 0 | 0 | 0 | 0 | 0 |
| rs4713479  | 31796778 | LY6G6C  | 2 | 2 | 2 | 2 | 2 |
| rs805292   | 31797988 | LY6G6C  | 2 | 2 | 2 | 2 | 2 |
| rs453098   | 31799636 | C6orf25 | 2 | 2 | 2 | 2 | 2 |
| rs2272592  | 31806331 | C6orf25 | 2 | 2 | 2 | 2 | 2 |
| rs400547   | 31810689 | C6orf25 | 2 | 2 | 2 | 2 | 2 |
| rs3131382  | 31815709 | MSH5    | 2 | 2 | 2 | 2 | 2 |
| rs707915   | 31818947 | MSH5    | 2 | 2 | 2 | 2 | 2 |
| rs3749953  | 31821103 | MSH5    | 2 | 2 | 2 | 2 | 2 |
| rs3828922  | 31821433 | MSH5    | 2 | 2 | 2 | 2 | 2 |
| rs3130484  | 31823861 | MSH5    | 0 | 0 | 0 | 0 | 0 |
| rs2299851  | 31826581 | MSH5    | 2 | 2 | 2 | 2 | 2 |
| rs3131379  | 31829012 | MSH5    | 0 | 0 | 0 | 0 | 0 |
| rs3131378  | 31833264 | MSH5    | 0 | 0 | 0 | 0 | 0 |
| rs707939   | 31834667 | MSH5    | 2 | 2 | 2 | 2 | 2 |
| rs2075801  | 31836246 | MSH5    | 2 | 2 | 2 | 2 | 2 |
| rs707936   | 31841629 | C6orf27 | 2 | 2 | 2 | 2 | 2 |
| rs11966331 | 31844814 | C6orf27 | 2 | 2 | 2 | 2 | 2 |
| rs7769537  | 31849960 | C6orf27 | 2 | 2 | 2 | 2 | 2 |
| rs707929   | 31850046 | C6orf27 | 0 | 0 | 0 | 0 | 0 |
| rs7769899  | 31850220 | C6orf27 | 2 | 2 | 2 | 2 | 2 |
| rs707928   | 31850569 | C6orf27 | 0 | 0 | 0 | 0 | 0 |
| rs707926   | 31856799 | VARS    | 2 | 2 | 2 | 2 | 2 |
| rs4713488  | 31870290 | VARS    | 2 | 2 | 2 | 2 | 2 |
| rs2607015  | 31870822 | VARS    | 2 | 2 | 2 | 2 | 2 |
| rs480092   | 31872878 | LSM2    | 2 | 2 | 2 | 2 | 2 |
| rs604895   | 31874420 | LSM2    | 2 | 2 | 2 | 2 | 2 |
| rs2075800  | 31885925 | HSPA1L  | 2 | 2 | 2 | 2 | 2 |
| rs2227955  | 31886056 | HSPA1L  | 2 | 2 | 2 | 2 | 2 |
| rs2227956  | 31886251 | HSPA1L  | 2 | 2 | 2 | 2 | 2 |
| rs2075799  | 31886508 | HSPA1L  | 2 | 2 | 2 | 2 | 2 |
| rs12182397 | 31887707 | HSPA1L  | 2 | 2 | 2 | 2 | 2 |
| rs2763979  | 31902571 | HSPA1B  | 0 | 0 | 0 | 0 | 0 |
| rs2471980  | 31908847 | C6orf48 | 0 | 0 | 0 | 0 | 0 |
| rs9368699  | 31910520 | C6orf48 | 2 | 2 | 2 | 2 | 2 |
| rs11968400 | 31912708 | C6orf48 | 2 | 2 | 2 | 2 | 2 |
| rs3115673  | 31918064 | C6orf48 | 2 | 2 | 2 | 2 | 2 |

|            |          |         |   |   |   |   |   |
|------------|----------|---------|---|---|---|---|---|
| rs9469063  | 31921555 | C6orf48 | 2 | 2 | 2 | 2 | 2 |
| rs12210887 | 31923702 | C6orf48 | 2 | 2 | 2 | 2 | 2 |
| rs9267649  | 31932807 | NEU1    | 2 | 2 | 2 | 2 | 2 |
| rs13118    | 31935265 | NEU1    | 2 | 2 | 2 | 2 | 2 |
| rs6915800  | 31941639 | NEU1    | 2 | 2 | 2 | 2 | 2 |
| rs4947332  | 31942176 | SLC44A4 | 2 | 2 | 2 | 2 | 2 |
| rs660594   | 31945229 | SLC44A4 | 0 | 0 | 0 | 0 | 0 |
| rs660550   | 31945256 | SLC44A4 | 2 | 2 | 2 | 2 | 2 |
| rs644827   | 31946420 | SLC44A4 | 2 | 2 | 2 | 2 | 2 |
| rs494620   | 31946692 | SLC44A4 | 2 | 2 | 2 | 2 | 2 |
| rs2242665  | 31947288 | SLC44A4 | 2 | 2 | 2 | 2 | 2 |
| rs3130481  | 31947735 | SLC44A4 | 2 | 2 | 2 | 2 | 2 |
| rs614549   | 31948604 | SLC44A4 | 2 | 2 | 2 | 2 | 2 |
| rs2736428  | 31951903 | SLC44A4 | 2 | 2 | 2 | 2 | 2 |
| rs9267658  | 31953964 | SLC44A4 | 2 | 2 | 2 | 2 | 2 |
| rs605203   | 31954991 | SLC44A4 | 0 | 0 | 0 | 0 | 0 |
| rs652888   | 31959213 | EHMT2   | 0 | 0 | 0 | 0 | 0 |
| rs535586   | 31968316 | EHMT2   | 0 | 0 | 0 | 0 | 0 |
| rs659445   | 31972283 | EHMT2   | 0 | 0 | 0 | 0 | 0 |
| rs558702   | 31978305 | ZBTB12  | 0 | 0 | 0 | 0 | 0 |
| rs2763982  | 31980530 | ZBTB12  | 2 | 2 | 2 | 2 | 2 |
| rs644045   | 31991936 | C2      | 0 | 0 | 0 | 0 | 0 |
| rs544167   | 31998137 | C2      | 2 | 2 | 2 | 2 | 2 |
| rs2734335  | 32001923 | C2      | 2 | 2 | 2 | 2 | 2 |
| rs7746553  | 32003952 | C2      | 2 | 2 | 2 | 2 | 2 |
| rs1042663  | 32013109 | C2      | 2 | 2 | 2 | 2 | 2 |
| rs9380272  | 32013989 | C2      | 2 | 2 | 2 | 2 | 2 |
| rs550605   | 32015126 | C2      | 2 | 2 | 2 | 2 | 2 |
| rs9332730  | 32019988 | C2      | 2 | 2 | 2 | 2 | 2 |
| rs4151651  | 32023593 | CFB     | 2 | 2 | 2 | 2 | 2 |
| rs541862   | 32024930 | CFB     | 2 | 2 | 2 | 2 | 2 |
| rs2072634  | 32025270 | CFB     | 2 | 2 | 2 | 2 | 2 |
| rs4151657  | 32025519 | CFB     | 2 | 2 | 2 | 2 | 2 |
| rs4151659  | 32026443 | CFB     | 2 | 2 | 2 | 2 | 2 |
| rs1270942  | 32026839 | CFB     | 0 | 0 | 0 | 0 | 0 |
| rs2072633  | 32027557 | CFB     | 0 | 0 | 0 | 0 | 0 |
| rs4151672  | 32027809 | CFB     | 2 | 2 | 2 | 2 | 2 |
| rs4151664  | 32028852 | RDBP    | 2 | 2 | 2 | 2 | 2 |
| rs630379   | 32030233 | RDBP    | 0 | 0 | 0 | 0 | 0 |
| rs440454   | 32035321 | RDBP    | 0 | 0 | 0 | 0 | 0 |
| rs438999   | 32036285 | SKIV2L  | 2 | 2 | 2 | 2 | 2 |
| rs437179   | 32036993 | SKIV2L  | 0 | 0 | 0 | 0 | 0 |
| rs2734331  | 32038330 | SKIV2L  | 2 | 2 | 2 | 2 | 2 |
| rs592229   | 32038420 | SKIV2L  | 0 | 0 | 0 | 0 | 0 |
| rs429608   | 32038441 | SKIV2L  | 2 | 2 | 2 | 2 | 2 |
| rs406936   | 32041140 | SKIV2L  | 2 | 2 | 2 | 2 | 2 |
| rs492899   | 32041497 | SKIV2L  | 2 | 2 | 2 | 2 | 2 |

|            |          |        |   |   |   |   |   |
|------------|----------|--------|---|---|---|---|---|
| rs454212   | 32042351 | SKIV2L | 2 | 2 | 2 | 2 | 2 |
| rs453821   | 32043290 | SKIV2L | 2 | 2 | 2 | 2 | 2 |
| rs474534   | 32046086 | DOM3Z  | 2 | 2 | 2 | 2 | 2 |
| rs389884   | 32048876 | STK19  | 0 | 0 | 0 | 0 | 0 |
| rs387608   | 32049536 | STK19  | 2 | 2 | 2 | 2 | 2 |
| rs6941112  | 32054593 | STK19  | 2 | 2 | 2 | 2 | 2 |
| rs389883   | 32055439 | STK19  | 0 | 0 | 0 | 0 | 0 |
| rs389512   | 32055573 | STK19  | 2 | 2 | 2 | 2 | 2 |
| rs12333245 | 32127747 | TNXB   | 2 | 2 | 2 | 2 | 2 |
| rs12198173 | 32134786 | TNXB   | 2 | 2 | 2 | 2 | 2 |
| rs1150758  | 32136127 | TNXB   | 0 | 0 | 0 | 0 | 0 |
| rs2269429  | 32137161 | TNXB   | 2 | 2 | 2 | 2 | 2 |
| rs2239689  | 32138262 | TNXB   | 2 | 2 | 2 | 2 | 2 |
| rs2071295  | 32146678 | TNXB   | 2 | 2 | 2 | 2 | 2 |
| rs204879   | 32151135 | TNXB   | 2 | 2 | 2 | 2 | 2 |
| rs7774197  | 32154253 | TNXB   | 2 | 2 | 2 | 2 | 2 |
| rs185819   | 32158045 | TNXB   | 2 | 2 | 2 | 2 | 2 |
| rs169496   | 32160961 | TNXB   | 2 | 2 | 2 | 2 | 2 |
| rs204900   | 32164558 | TNXB   | 2 | 2 | 2 | 2 | 2 |
| rs204899   | 32165605 | TNXB   | 2 | 2 | 2 | 2 | 2 |
| rs2071293  | 32170665 | TNXB   | 2 | 2 | 2 | 2 | 2 |
| rs1150752  | 32172704 | TNXB   | 9 | 0 | 9 | 0 | 9 |
| rs13199524 | 32174743 | TNXB   | 2 | 2 | 2 | 2 | 2 |
| rs3134954  | 32179871 | TNXB   | 2 | 2 | 2 | 1 | 2 |
| rs12153855 | 32182782 | TNXB   | 2 | 2 | 2 | 2 | 2 |
| rs2269426  | 32184477 | TNXB   | 2 | 2 | 2 | 2 | 2 |
| rs411337   | 32185358 | TNXB   | 2 | 2 | 2 | 2 | 2 |
| rs3807039  | 32186351 | TNXB   | 2 | 2 | 2 | 2 | 2 |
| rs1269852  | 32188169 | CREBL1 | 0 | 0 | 0 | 0 | 0 |
| rs8111     | 32191153 | CREBL1 | 2 | 2 | 2 | 2 | 2 |
| rs204890   | 32193576 | CREBL1 | 2 | 2 | 2 | 2 | 2 |
| rs204888   | 32197120 | CREBL1 | 2 | 2 | 2 | 2 | 2 |
| rs3830076  | 32204222 | CREBL1 | 2 | 2 | 2 | 2 | 2 |
| rs169494   | 32205854 | FKBPL  | 2 | 2 | 2 | 2 | 2 |
| rs4713505  | 32212979 | FKBPL  | 2 | 2 | 2 | 2 | 2 |
| rs204999   | 32217957 | PRRT1  | 0 | 0 | 0 | 0 | 0 |
| rs3131283  | 32227876 | PRRT1  | 2 | 2 | 2 | 2 | 2 |
| rs1053924  | 32228693 | PPT2   | 2 | 2 | 2 | 2 | 2 |
| rs2269425  | 32231617 | PPT2   | 2 | 2 | 2 | 2 | 2 |
| rs3134603  | 32233980 | PPT2   | 2 | 2 | 2 | 2 | 2 |
| rs3134950  | 32235455 | PPT2   | 2 | 2 | 2 | 2 | 2 |
| rs3096697  | 32242488 | EGFL8  | 0 | 0 | 0 | 0 | 0 |
| rs2071289  | 32243114 | EGFL8  | 2 | 2 | 2 | 2 | 2 |
| rs205000   | 32243856 | AGPAT1 | 2 | 2 | 2 | 2 | 2 |
| rs3130283  | 32246523 | AGPAT1 | 2 | 2 | 2 | 2 | 2 |
| rs3131297  | 32248983 | AGPAT1 | 0 | 0 | 0 | 0 | 0 |
| rs2269423  | 32253685 | AGPAT1 | 2 | 2 | 2 | 2 | 2 |



|           |          |        |   |   |   |   |   |
|-----------|----------|--------|---|---|---|---|---|
| rs3134945 | 32254470 | RNF5   | 0 | 0 | 0 | 0 | 0 |
| rs3130349 | 32255674 | RNF5   | 0 | 0 | 0 | 0 | 0 |
| rs3134943 | 32255739 | RNF5   | 2 | 2 | 2 | 2 | 2 |
| rs204996  | 32257861 | RNF5   | 2 | 2 | 2 | 2 | 2 |
| rs1035798 | 32259200 | AGER   | 2 | 2 | 2 | 2 | 2 |
| rs2070600 | 32259421 | AGER   | 2 | 2 | 2 | 2 | 2 |
| rs1800625 | 32260420 | PBX2   | 0 | 0 | 0 | 0 | 0 |
| rs204995  | 32262263 | PBX2   | 0 | 0 | 0 | 0 | 0 |
| rs204994  | 32262976 | PBX2   | 0 | 0 | 0 | 0 | 0 |
| rs204993  | 32263559 | PBX2   | 0 | 0 | 0 | 0 | 0 |
| rs204992  | 32264886 | PBX2   | 0 | 0 | 0 | 0 | 0 |
| rs176095  | 32266297 | GPSM3  | 0 | 0 | 0 | 0 | 0 |
| rs3134605 | 32267934 | GPSM3  | 0 | 0 | 0 | 0 | 0 |
| rs204991  | 32269344 | GPSM3  | 0 | 0 | 0 | 0 | 0 |
| rs204990  | 32269408 | GPSM3  | 0 | 0 | 0 | 0 | 0 |
| rs8192579 | 32271777 | GPSM3  | 2 | 2 | 2 | 2 | 2 |
| rs2071278 | 32273422 | NOTCH4 | 0 | 0 | 0 | 0 | 0 |
| rs3134942 | 32276749 | NOTCH4 | 0 | 0 | 0 | 0 | 0 |
| rs3132935 | 32279053 | NOTCH4 | 0 | 0 | 0 | 0 | 0 |
| rs2071277 | 32279661 | NOTCH4 | 2 | 2 | 2 | 2 | 2 |
| rs1044506 | 32280043 | NOTCH4 | 2 | 2 | 2 | 2 | 2 |
| rs3131296 | 32280971 | NOTCH4 | 0 | 0 | 0 | 0 | 0 |
| rs206018  | 32285858 | NOTCH4 | 2 | 2 | 2 | 2 | 2 |
| rs9267833 | 32285878 | NOTCH4 | 2 | 2 | 2 | 2 | 2 |
| rs2071286 | 32287874 | NOTCH4 | 2 | 2 | 2 | 2 | 2 |
| rs2071285 | 32288409 | NOTCH4 | 2 | 2 | 2 | 2 | 2 |
| rs206015  | 32290737 | NOTCH4 | 2 | 2 | 2 | 2 | 2 |
| rs404860  | 32292323 | NOTCH4 | 2 | 2 | 2 | 2 | 2 |
| rs384247  | 32292552 | NOTCH4 | 2 | 2 | 2 | 2 | 2 |
| rs2854050 | 32293583 | NOTCH4 | 2 | 2 | 2 | 2 | 2 |
| rs8192591 | 32293774 | NOTCH4 | 2 | 2 | 2 | 2 | 2 |
| rs379464  | 32294326 | NOTCH4 | 2 | 2 | 2 | 2 | 2 |
| rs394657  | 32295001 | NOTCH4 | 2 | 2 | 2 | 2 | 2 |
| rs431722  | 32295700 | NOTCH4 | 2 | 2 | 2 | 2 | 2 |
| rs423023  | 32296275 | NOTCH4 | 2 | 2 | 2 | 2 | 2 |
| rs422951  | 32296361 | NOTCH4 | 2 | 2 | 2 | 2 | 2 |
| rs3132946 | 32298006 | NOTCH4 | 2 | 2 | 2 | 2 | 2 |
| rs443198  | 32298384 | NOTCH4 | 0 | 0 | 0 | 0 | 0 |
| rs3134931 | 32298598 | NOTCH4 | 2 | 2 | 2 | 2 | 2 |
| rs434841  | 32299019 | NOTCH4 | 0 | 0 | 0 | 0 | 0 |
| rs3830041 | 32299317 | NOTCH4 | 2 | 2 | 2 | 2 | 2 |
| rs396960  | 32299559 | NOTCH4 | 2 | 2 | 2 | 2 | 2 |
| rs397596  | 32300462 | NOTCH4 | 2 | 2 | 2 | 2 | 2 |
| rs2267644 | 32300538 | NOTCH4 | 2 | 2 | 2 | 2 | 2 |
| rs479536  | 32301656 | NOTCH4 | 2 | 2 | 2 | 2 | 2 |
| rs499691  | 32302317 | NOTCH4 | 2 | 2 | 2 | 2 | 2 |
| rs1475961 | 32302587 | NOTCH4 | 2 | 2 | 2 | 2 | 2 |

|            |           |           |   |   |   |   |   |
|------------|-----------|-----------|---|---|---|---|---|
| rs3096691  | 32302832  | NOTCH4    | 2 | 2 | 2 | 2 | 2 |
| rs482759   | 32302995  | NOTCH4    | 2 | 2 | 2 | 2 | 2 |
| rs532385   | 32303337  | NOTCH4    | 2 | 2 | 2 | 2 | 2 |
| rs365053   | 32303966  | NOTCH4    | 2 | 2 | 2 | 2 | 2 |
| rs404890   | 32306845  | NOTCH4    | 0 | 0 | 0 | 0 | 0 |
| rs2849015  | 32306914  | NOTCH4    | 0 | 0 | 0 | 0 | 0 |
| rs9267873  | 32307330  | NOTCH4    | 2 | 2 | 2 | 2 | 2 |
| rs3130299  | 32311515  | NOTCH4    | 2 | 2 | 2 | 2 | 2 |
| rs416352   | 32315371  | NOTCH4    | 0 | 0 | 0 | 0 | 0 |
| rs424232   | 32316302  | LOC401252 | 0 | 0 | 0 | 0 | 0 |
| rs382259   | 32317005  | LOC401252 | 2 | 2 | 2 | 2 | 2 |
| rs507778   | 32317839  | LOC401252 | 0 | 0 | 0 | 0 | 0 |
| rs419132   | 32318777  | LOC401252 | 2 | 2 | 2 | 2 | 2 |
| rs411326   | 32319295  | LOC401252 | 2 | 2 | 2 | 2 | 2 |
| rs9267948  | 32320211  | LOC401252 | 2 | 2 | 2 | 2 | 2 |
| rs440169   | 32321766  | LOC401252 | 2 | 2 | 2 | 2 | 2 |
| rs6936204  | 32325070  | LOC401252 | 0 | 0 | 0 | 0 | 0 |
| rs3115573  | 32326821  | LOC401252 | 2 | 2 | 2 | 2 | 2 |
| rs9296015  | 32326967  | LOC401252 | 2 | 2 | 2 | 2 | 2 |
| rs4959089  | 32327703  | LOC401252 | 2 | 2 | 2 | 2 | 2 |
| rs9267992  | 32328375  | LOC401252 | 2 | 2 | 2 | 2 | 2 |
| rs3130315  | 32328663  | LOC401252 | 2 | 2 | 2 | 2 | 2 |
| rs3130316  | 32329206  | LOC401252 | 0 | 0 | 0 | 0 | 0 |
| rs3096700  | 32329760  | LOC401252 | 0 | 0 | 0 | 0 | 0 |
| rs3130320  | 32331236  | LOC401252 | 0 | 0 | 0 | 0 | 0 |
| rs3115569  | 32332117  | LOC401252 | 0 | 0 | 0 | 0 | 0 |
| rs3130340  | 32332605  | LOC401252 | 0 | 0 | 0 | 0 | 0 |
| rs3115553  | 323353805 | LOC401252 | 0 | 0 | 0 | 0 | 0 |
| rs9268132  | 32362632  | C6orf10   | 2 | 2 | 2 | 2 | 2 |
| rs926070   | 32365544  | C6orf10   | 2 | 2 | 2 | 2 | 2 |
| rs9268148  | 32367505  | C6orf10   | 2 | 2 | 2 | 2 | 2 |
| rs6935269  | 32368328  | C6orf10   | 0 | 0 | 0 | 0 | 0 |
| rs7775397  | 32369230  | C6orf10   | 0 | 0 | 0 | 0 | 0 |
| rs3749966  | 32369485  | C6orf10   | 0 | 0 | 0 | 0 | 0 |
| rs477005   | 32378478  | C6orf10   | 2 | 2 | 2 | 2 | 2 |
| rs6457536  | 32381743  | C6orf10   | 0 | 0 | 0 | 0 | 0 |
| rs7341328  | 32383172  | C6orf10   | 0 | 0 | 0 | 0 | 0 |
| rs547261   | 32390011  | C6orf10   | 2 | 2 | 2 | 2 | 2 |
| rs6910071  | 32390832  | C6orf10   | 2 | 2 | 2 | 2 | 2 |
| rs498422   | 32394739  | C6orf10   | 2 | 2 | 2 | 2 | 2 |
| rs547077   | 32397296  | C6orf10   | 2 | 2 | 2 | 2 | 2 |
| rs3132958  | 32405879  | C6orf10   | 2 | 2 | 2 | 2 | 2 |
| rs10484560 | 32406115  | C6orf10   | 2 | 2 | 2 | 2 | 2 |
| rs9405090  | 32406350  | C6orf10   | 2 | 2 | 2 | 2 | 2 |
| rs3129949  | 32406792  | C6orf10   | 0 | 0 | 0 | 0 | 0 |
| rs1003878  | 32407800  | C6orf10   | 0 | 0 | 0 | 0 | 0 |
| rs1033500  | 32415360  | C6orf10   | 2 | 2 | 2 | 2 | 2 |

|            |          |         |   |   |   |   |   |
|------------|----------|---------|---|---|---|---|---|
| rs3129904  | 32418374 | C6orf10 | 2 | 2 | 2 | 2 | 2 |
| rs1555117  | 32419126 | C6orf10 | 2 | 2 | 2 | 2 | 2 |
| rs6904320  | 32420060 | C6orf10 | 2 | 2 | 2 | 2 | 2 |
| rs3117123  | 32424367 | C6orf10 | 2 | 2 | 2 | 2 | 2 |
| rs2076540  | 32425254 | C6orf10 | 2 | 2 | 2 | 2 | 2 |
| rs2076537  | 32425613 | C6orf10 | 0 | 0 | 0 | 0 | 0 |
| rs3132963  | 32428131 | C6orf10 | 2 | 2 | 2 | 2 | 2 |
| rs2395148  | 32429532 | C6orf10 | 2 | 2 | 2 | 2 | 2 |
| rs1265759  | 32430371 | C6orf10 | 2 | 2 | 2 | 2 | 2 |
| rs6907322  | 32432923 | C6orf10 | 2 | 2 | 2 | 2 | 2 |
| rs2395150  | 32434023 | C6orf10 | 2 | 2 | 2 | 2 | 2 |
| rs9268368  | 32441933 | C6orf10 | 2 | 2 | 2 | 2 | 2 |
| rs2073048  | 32443411 | C6orf10 | 2 | 2 | 2 | 2 | 2 |
| rs9268384  | 32444564 | C6orf10 | 2 | 2 | 2 | 2 | 2 |
| rs3129939  | 32444744 | C6orf10 | 0 | 0 | 0 | 0 | 0 |
| rs2273017  | 32445608 | C6orf10 | 2 | 2 | 2 | 2 | 2 |
| rs3129941  | 32445664 | C6orf10 | 2 | 2 | 2 | 2 | 2 |
| rs3129943  | 32446673 | C6orf10 | 0 | 0 | 0 | 0 | 0 |
| rs2050191  | 32446879 | C6orf10 | 2 | 2 | 2 | 2 | 2 |
| rs2073044  | 32446964 | C6orf10 | 2 | 2 | 2 | 2 | 2 |
| rs2050190  | 32447054 | C6orf10 | 0 | 0 | 0 | 0 | 0 |
| rs2076536  | 32447326 | C6orf10 | 2 | 2 | 2 | 2 | 2 |
| rs2076535  | 32447489 | C6orf10 | 2 | 2 | 2 | 2 | 2 |
| rs2050189  | 32447625 | C6orf10 | 0 | 1 | 0 | 0 | 0 |
| rs2395153  | 32453573 | C6orf10 | 2 | 2 | 2 | 2 | 2 |
| rs1980495  | 32454772 | C6orf10 | 2 | 2 | 2 | 2 | 2 |
| rs2395157  | 32456123 | C6orf10 | 2 | 2 | 2 | 2 | 2 |
| rs4424066  | 32462406 | BTNL2   | 2 | 2 | 2 | 2 | 2 |
| rs1555115  | 32462498 | BTNL2   | 2 | 2 | 2 | 2 | 2 |
| rs12529049 | 32465693 | BTNL2   | 2 | 2 | 2 | 2 | 2 |
| rs3117098  | 32466491 | BTNL2   | 2 | 2 | 2 | 2 | 2 |
| rs3817973  | 32469089 | BTNL2   | 2 | 2 | 2 | 2 | 2 |
| rs3817969  | 32469366 | BTNL2   | 2 | 2 | 2 | 2 | 2 |
| rs1980493  | 32471193 | BTNL2   | 0 | 0 | 0 | 0 | 0 |
| rs2076530  | 32471794 | BTNL2   | 2 | 2 | 2 | 2 | 2 |
| rs4248166  | 32474399 | BTNL2   | 2 | 2 | 2 | 2 | 2 |
| rs2294884  | 32475237 | BTNL2   | 2 | 2 | 2 | 2 | 2 |
| rs2294883  | 32475429 | BTNL2   | 2 | 2 | 2 | 2 | 2 |
| rs3817966  | 32475825 | BTNL2   | 2 | 2 | 2 | 2 | 2 |
| rs3817964  | 32475975 | BTNL2   | 2 | 2 | 2 | 2 | 2 |
| rs3817963  | 32476065 | BTNL2   | 2 | 2 | 2 | 2 | 2 |
| rs3763305  | 32477466 | BTNL2   | 2 | 2 | 2 | 2 | 2 |
| rs2076520  | 32479247 | BTNL2   | 2 | 2 | 2 | 2 | 2 |
| rs3806156  | 32481676 | BTNL2   | 2 | 2 | 2 | 2 | 2 |
| rs3806157  | 32481779 | BTNL2   | 2 | 2 | 2 | 2 | 2 |
| rs6926737  | 32483723 | BTNL2   | 2 | 2 | 2 | 2 | 2 |
| rs3763309  | 32483951 | BTNL2   | 2 | 2 | 2 | 2 | 2 |

|            |          |         |   |   |   |   |   |
|------------|----------|---------|---|---|---|---|---|
| rs3763311  | 32484154 | BTNL2   | 2 | 2 | 2 | 2 | 2 |
| rs3763313  | 32484449 | BTNL2   | 2 | 2 | 2 | 2 | 2 |
| rs9268507  | 32485517 | BTNL2   | 2 | 2 | 2 | 2 | 2 |
| rs3129961  | 32486918 | BTNL2   | 2 | 2 | 2 | 2 | 2 |
| rs3129963  | 32488186 | BTNL2   | 0 | 0 | 0 | 0 | 0 |
| rs6932542  | 32488240 | BTNL2   | 2 | 2 | 2 | 2 | 2 |
| rs743862   | 32489917 | BTNL2   | 0 | 0 | 0 | 0 | 0 |
| rs9268542  | 32492699 | BTNL2   | 2 | 2 | 2 | 2 | 2 |
| rs2187820  | 32493851 | BTNL2   | 0 | 0 | 0 | 0 | 0 |
| rs2395163  | 32495787 | BTNL2   | 2 | 2 | 2 | 2 | 2 |
| rs2395165  | 32496122 | BTNL2   | 2 | 2 | 2 | 2 | 2 |
| rs3135366  | 32496687 | BTNL2   | 0 | 0 | 0 | 0 | 0 |
| rs3135363  | 32497626 | BTNL2   | 0 | 0 | 0 | 0 | 0 |
| rs3135353  | 32500855 | HLA-DRA | 0 | 0 | 0 | 0 | 0 |
| rs3135352  | 32500884 | HLA-DRA | 2 | 2 | 2 | 2 | 2 |
| rs6457580  | 32501119 | HLA-DRA | 2 | 2 | 2 | 2 | 2 |
| rs2395171  | 32502515 | HLA-DRA | 0 | 0 | 0 | 0 | 0 |
| rs2187818  | 32503546 | HLA-DRA | 2 | 2 | 2 | 2 | 2 |
| rs3129845  | 32504255 | HLA-DRA | 0 | 0 | 0 | 0 | 0 |
| rs3135340  | 32506850 | HLA-DRA | 0 | 0 | 0 | 0 | 0 |
| rs984778   | 32508066 | HLA-DRA | 2 | 2 | 2 | 2 | 2 |
| rs9501626  | 32508322 | HLA-DRA | 2 | 2 | 2 | 2 | 2 |
| rs3129859  | 32508917 | HLA-DRA | 0 | 0 | 0 | 0 | 0 |
| rs3135338  | 32509195 | HLA-DRA | 2 | 2 | 2 | 2 | 2 |
| rs7356880  | 32509305 | HLA-DRA | 2 | 2 | 2 | 2 | 2 |
| rs7773756  | 32510442 | HLA-DRA | 2 | 2 | 2 | 2 | 2 |
| rs2395173  | 32512837 | HLA-DRA | 2 | 2 | 2 | 2 | 2 |
| rs2395174  | 32512856 | HLA-DRA | 0 | 0 | 0 | 0 | 0 |
| rs2395175  | 32513004 | HLA-DRA | 2 | 2 | 2 | 2 | 2 |
| rs2395178  | 32513340 | HLA-DRA | 2 | 2 | 2 | 2 | 2 |
| rs3129871  | 32514320 | HLA-DRA | 2 | 2 | 2 | 2 | 2 |
| rs14004    | 32515687 | HLA-DRA | 2 | 2 | 2 | 2 | 2 |
| rs3129876  | 32515990 | HLA-DRA | 0 | 0 | 0 | 0 | 0 |
| rs3129878  | 32516713 | HLA-DRA | 0 | 0 | 0 | 0 | 0 |
| rs3129882  | 32517508 | HLA-DRA | 2 | 2 | 2 | 2 | 2 |
| rs3129886  | 32518554 | HLA-DRA | 2 | 2 | 2 | 2 | 2 |
| rs3135391  | 32518965 | HLA-DRA | 2 | 2 | 2 | 2 | 2 |
| rs2239805  | 32519354 | HLA-DRA | 0 | 0 | 0 | 0 | 0 |
| rs2239804  | 32519501 | HLA-DRA | 2 | 2 | 2 | 2 | 2 |
| rs7192     | 32519624 | HLA-DRA | 0 | 0 | 0 | 0 | 0 |
| rs3129888  | 32519704 | HLA-DRA | 2 | 2 | 2 | 2 | 2 |
| rs3135388  | 32521029 | HLA-DRA | 2 | 2 | 2 | 2 | 2 |
| rs2395182  | 32521295 | HLA-DRA | 2 | 2 | 2 | 2 | 2 |
| rs2227139  | 32521437 | HLA-DRA | 0 | 0 | 0 | 0 | 0 |
| rs3129890  | 32522251 | HLA-DRA | 0 | 0 | 0 | 0 | 0 |
| rs7452076  | 32523058 | HLA-DRA | 0 | 0 | 0 | 0 | 0 |
| rs13209234 | 32523953 | HLA-DRA | 2 | 2 | 2 | 2 | 2 |

|            |          |          |   |   |   |   |   |
|------------|----------|----------|---|---|---|---|---|
| rs9268832  | 32535767 | HLA-DRA  | 0 | 0 | 0 | 0 | 0 |
| rs6903608  | 32536263 | HLA-DRA  | 2 | 2 | 2 | 2 | 2 |
| rs4434496  | 32538486 | HLA-DRA  | 0 | 0 | 0 | 0 | 0 |
| rs7766843  | 32538707 | HLA-DRA  | 0 | 0 | 0 | 0 | 0 |
| rs2395185  | 32541145 | HLA-DRA  | 2 | 2 | 2 | 2 | 2 |
| rs6901541  | 32550239 | HLA-DRA  | 0 | 0 | 0 | 0 | 0 |
| rs6916742  | 32561169 | HLA-DRA  | 2 | 2 | 2 | 2 | 2 |
| rs2516049  | 32678378 | HLA-DRB1 | 2 | 2 | 2 | 2 | 2 |
| rs660895   | 32685358 | HLA-DRB1 | 2 | 2 | 2 | 2 | 2 |
| rs532098   | 32686030 | HLA-DRB1 | 2 | 2 | 2 | 2 | 2 |
| rs9271366  | 32694832 | HLA-DQA1 | 2 | 2 | 2 | 2 | 2 |
| rs3129763  | 32698903 | HLA-DQA1 | 0 | 0 | 0 | 0 | 0 |
| rs1269829  | 32700829 | HLA-DQA1 | 2 | 2 | 2 | 2 | 2 |
| rs4639334  | 32710192 | HLA-DQA1 | 2 | 2 | 2 | 2 | 2 |
| rs2040410  | 32710676 | HLA-DQA1 | 0 | 0 | 0 | 9 | 0 |
| rs2040406  | 32710985 | HLA-DQA1 | 0 | 0 | 0 | 0 | 0 |
| rs2187668  | 32713862 | HLA-DQA1 | 0 | 0 | 0 | 0 | 0 |
| rs6927022  | 32720375 | HLA-DQA1 | 2 | 2 | 2 | 2 | 2 |
| rs7744001  | 32734064 | HLA-DQB1 | 2 | 2 | 2 | 2 | 2 |
| rs6928482  | 32734227 | HLA-DQB1 | 9 | 9 | 2 | 2 | 9 |
| rs1063355  | 32735692 | HLA-DQB1 | 2 | 2 | 2 | 2 | 2 |
| rs9275141  | 32759095 | HLA-DQB1 | 2 | 2 | 2 | 2 | 2 |
| rs6457614  | 32759878 | HLA-DQB1 | 2 | 2 | 2 | 2 | 2 |
| rs7755224  | 32760295 | HLA-DQB1 | 2 | 2 | 2 | 2 | 2 |
| rs3134975  | 32760559 | HLA-DQB1 | 2 | 2 | 2 | 2 | 2 |
| rs4947342  | 32761048 | HLA-DQB1 | 2 | 2 | 2 | 2 | 2 |
| rs2856691  | 32761413 | HLA-DQB1 | 2 | 2 | 2 | 2 | 2 |
| rs9275184  | 32762692 | HLA-DQB1 | 2 | 2 | 2 | 2 | 2 |
| rs2856683  | 32763196 | HLA-DQB1 | 2 | 2 | 2 | 2 | 2 |
| rs4642516  | 32765521 | HLA-DQB1 | 2 | 2 | 2 | 2 | 2 |
| rs7775228  | 32766057 | HLA-DQB1 | 2 | 2 | 2 | 2 | 2 |
| rs2157051  | 32766602 | HLA-DQB1 | 2 | 2 | 2 | 2 | 2 |
| rs5000634  | 32771542 | HLA-DQB1 | 2 | 2 | 2 | 2 | 2 |
| rs6457617  | 32771829 | HLA-DQB1 | 2 | 2 | 2 | 2 | 2 |
| rs2647012  | 32772436 | HLA-DQB1 | 0 | 0 | 0 | 0 | 0 |
| rs9357152  | 32772938 | HLA-DQB1 | 2 | 2 | 2 | 2 | 2 |
| rs10484561 | 32773398 | HLA-DQB1 | 2 | 2 | 2 | 2 | 2 |
| rs9275312  | 32773706 | HLA-DQB1 | 2 | 2 | 2 | 2 | 2 |
| rs1794282  | 32774504 | HLA-DQB1 | 0 | 0 | 0 | 0 | 0 |
| rs3135006  | 32775097 | HLA-DQB1 | 2 | 2 | 2 | 2 | 2 |
| rs9275390  | 32777134 | HLA-DQB1 | 2 | 2 | 2 | 2 | 2 |
| rs2647050  | 32777745 | HLA-DQB1 | 2 | 2 | 2 | 2 | 2 |
| rs2856718  | 32778233 | HLA-DQB1 | 2 | 2 | 2 | 2 | 2 |
| rs2856705  | 32778934 | HLA-DQB1 | 2 | 2 | 2 | 2 | 2 |
| rs1794265  | 32782715 | HLA-DQA2 | 2 | 2 | 2 | 2 | 2 |
| rs6932517  | 32786160 | HLA-DQA2 | 0 | 0 | 0 | 0 | 0 |
| rs9275572  | 32786977 | HLA-DQA2 | 0 | 0 | 0 | 0 | 0 |

|            |          |          |   |   |   |   |   |
|------------|----------|----------|---|---|---|---|---|
| rs7745656  | 32788948 | HLA-DQA2 | 2 | 2 | 2 | 2 | 2 |
| rs2858333  | 32789063 | HLA-DQA2 | 2 | 2 | 2 | 2 | 2 |
| rs2858331  | 32789255 | HLA-DQA2 | 2 | 2 | 2 | 2 | 2 |
| rs7454108  | 32789461 | HLA-DQA2 | 2 | 2 | 2 | 2 | 2 |
| rs3916766  | 32789623 | HLA-DQA2 | 2 | 2 | 2 | 2 | 2 |
| rs3998159  | 32789997 | HLA-DQA2 | 2 | 2 | 2 | 2 | 2 |
| rs3873444  | 32790702 | HLA-DQA2 | 2 | 2 | 2 | 2 | 2 |
| rs3892710  | 32790840 | HLA-DQA2 | 2 | 2 | 2 | 2 | 2 |
| rs6935940  | 32791669 | HLA-DQA2 | 2 | 2 | 2 | 2 | 2 |
| rs6936863  | 32792007 | HLA-DQA2 | 2 | 2 | 2 | 2 | 2 |
| rs3916765  | 32793528 | HLA-DQA2 | 2 | 2 | 2 | 2 | 2 |
| rs12177980 | 32794062 | HLA-DQA2 | 2 | 2 | 2 | 2 | 2 |
| rs9461799  | 32797507 | HLA-DQA2 | 2 | 2 | 2 | 2 | 2 |
| rs2395246  | 32799753 | HLA-DQA2 | 2 | 2 | 2 | 2 | 2 |
| rs5029394  | 32803060 | HLA-DQA2 | 2 | 2 | 2 | 2 | 2 |
| rs2859100  | 32807457 | HLA-DQA2 | 2 | 2 | 2 | 2 | 2 |
| rs6913505  | 32810359 | HLA-DQA2 | 0 | 0 | 0 | 0 | 0 |
| rs2858881  | 32811823 | HLA-DQA2 | 2 | 2 | 2 | 2 | 2 |
| rs2858880  | 32812862 | HLA-DQA2 | 2 | 2 | 2 | 2 | 2 |
| rs7773149  | 32814020 | HLA-DQA2 | 2 | 2 | 2 | 2 | 2 |
| rs7773955  | 32814697 | HLA-DQA2 | 2 | 2 | 2 | 2 | 2 |
| rs2213568  | 32819554 | HLA-DQA2 | 2 | 2 | 2 | 2 | 2 |
| rs2213567  | 32819633 | HLA-DQA2 | 2 | 2 | 2 | 2 | 2 |
| rs9276431  | 32820225 | HLA-DQA2 | 2 | 2 | 2 | 2 | 2 |
| rs2239800  | 32821245 | HLA-DQA2 | 2 | 2 | 2 | 2 | 2 |
| rs2071800  | 32822121 | HLA-DQA2 | 2 | 2 | 2 | 2 | 2 |
| rs2395253  | 32823138 | HLA-DQA2 | 2 | 2 | 2 | 2 | 2 |
| rs4415152  | 32825002 | HLA-DQA2 | 2 | 2 | 2 | 2 | 2 |
| rs2213569  | 32829552 | HLA-DQA2 | 2 | 2 | 2 | 2 | 2 |
| rs6918223  | 32830510 | HLA-DQB2 | 2 | 2 | 2 | 2 | 2 |
| rs7756516  | 32831895 | HLA-DQB2 | 2 | 2 | 2 | 2 | 2 |
| rs7774954  | 32832167 | HLA-DQB2 | 2 | 2 | 2 | 2 | 2 |
| rs2301271  | 32833171 | HLA-DQB2 | 2 | 2 | 2 | 2 | 2 |
| rs762815   | 32837620 | HLA-DQB2 | 2 | 2 | 2 | 2 | 2 |
| rs7453920  | 32837990 | HLA-DQB2 | 2 | 2 | 2 | 2 | 2 |
| rs2051549  | 32838064 | HLA-DQB2 | 2 | 2 | 2 | 2 | 2 |
| rs2071550  | 32838918 | HLA-DQB2 | 2 | 2 | 2 | 2 | 2 |
| rs1573649  | 32839236 | HLA-DQB2 | 2 | 2 | 2 | 2 | 2 |
| rs6903130  | 32840188 | HLA-DQB2 | 2 | 2 | 2 | 2 | 2 |
| rs9276586  | 32840915 | HLA-DQB2 | 2 | 2 | 2 | 2 | 2 |
| rs6457655  | 32843484 | HLA-DQB2 | 2 | 2 | 2 | 2 | 2 |
| rs9296044  | 32844122 | HLA-DQB2 | 2 | 2 | 2 | 2 | 2 |
| rs9368741  | 32845485 | HLA-DQB2 | 2 | 2 | 2 | 2 | 2 |
| rs1383265  | 32847866 | HLA-DQB2 | 2 | 2 | 2 | 2 | 2 |
| rs2621421  | 32848649 | HLA-DQB2 | 2 | 2 | 2 | 2 | 2 |
| rs2621416  | 32849846 | HLA-DQB2 | 2 | 2 | 2 | 2 | 2 |
| rs2621413  | 32850509 | HLA-DQB2 | 2 | 2 | 2 | 2 | 2 |

|            |          |          |   |   |   |   |   |
|------------|----------|----------|---|---|---|---|---|
| rs2857207  | 32851151 | HLA-DQB2 | 2 | 2 | 2 | 2 | 2 |
| rs9276644  | 32853021 | HLA-DQB2 | 0 | 0 | 0 | 0 | 0 |
| rs719654   | 32860117 | HLA-DQB2 | 2 | 2 | 2 | 2 | 2 |
| rs719653   | 32860544 | HLA-DQB2 | 2 | 2 | 2 | 2 | 2 |
| rs2857177  | 32860818 | HLA-DQB2 | 2 | 2 | 2 | 2 | 2 |
| rs7762279  | 32863268 | HLA-DQB2 | 1 | 0 | 0 | 0 | 0 |
| rs7758736  | 32866372 | HLA-DOB  | 1 | 0 | 0 | 0 | 0 |
| rs2621384  | 32867251 | HLA-DOB  | 2 | 2 | 2 | 2 | 2 |
| rs3948793  | 32867426 | HLA-DOB  | 0 | 0 | 0 | 0 | 0 |
| rs2857154  | 32870594 | HLA-DOB  | 2 | 2 | 2 | 2 | 2 |
| rs2621377  | 32871088 | HLA-DOB  | 2 | 2 | 2 | 2 | 2 |
| rs2857151  | 32871492 | HLA-DOB  | 2 | 2 | 2 | 2 | 2 |
| rs2857150  | 32871799 | HLA-DOB  | 2 | 2 | 2 | 2 | 2 |
| rs1383261  | 32873429 | HLA-DOB  | 0 | 0 | 0 | 0 | 0 |
| rs2621366  | 32876958 | HLA-DOB  | 2 | 2 | 2 | 2 | 2 |
| rs2219893  | 32877641 | HLA-DOB  | 2 | 2 | 2 | 2 | 2 |
| rs6899857  | 32878460 | HLA-DOB  | 0 | 0 | 0 | 0 | 0 |
| rs6457680  | 32878666 | HLA-DOB  | 0 | 0 | 0 | 0 | 0 |
| rs2621332  | 32888295 | HLA-DOB  | 2 | 2 | 2 | 2 | 2 |
| rs11244    | 32888702 | HLA-DOB  | 0 | 0 | 0 | 0 | 0 |
| rs2621330  | 32889502 | HLA-DOB  | 2 | 2 | 2 | 2 | 2 |
| rs2070121  | 32889532 | HLA-DOB  | 2 | 2 | 2 | 2 | 2 |
| rs2856997  | 32889754 | HLA-DOB  | 2 | 2 | 2 | 2 | 2 |
| rs2071475  | 32890365 | HLA-DOB  | 2 | 2 | 2 | 2 | 2 |
| rs2071474  | 32890560 | HLA-DOB  | 2 | 2 | 2 | 2 | 2 |
| rs2071473  | 32890583 | HLA-DOB  | 2 | 2 | 2 | 2 | 2 |
| rs7383287  | 32891064 | HLA-DOB  | 1 | 0 | 0 | 0 | 0 |
| rs2621326  | 32891874 | HLA-DOB  | 2 | 2 | 2 | 2 | 2 |
| rs2071554  | 32892654 | HLA-DOB  | 2 | 2 | 2 | 2 | 2 |
| rs2071469  | 32892761 | HLA-DOB  | 2 | 2 | 2 | 2 | 2 |
| rs2857107  | 32893493 | HLA-DOB  | 1 | 2 | 2 | 2 | 2 |
| rs1894408  | 32894811 | HLA-DOB  | 2 | 2 | 2 | 2 | 2 |
| rs3763350  | 32895097 | HLA-DOB  | 2 | 2 | 2 | 2 | 2 |
| rs17220136 | 32895315 | TAP2     | 2 | 2 | 2 | 2 | 2 |
| rs2857106  | 32895548 | TAP2     | 2 | 2 | 2 | 2 | 2 |
| rs2621323  | 32896685 | TAP2     | 2 | 2 | 2 | 2 | 2 |
| rs2856993  | 32899381 | TAP2     | 2 | 2 | 2 | 2 | 2 |
| rs1894411  | 32900951 | TAP2     | 1 | 2 | 2 | 2 | 2 |
| rs13501    | 32901501 | TAP2     | 2 | 2 | 2 | 2 | 2 |
| rs6905503  | 32902097 | TAP2     | 2 | 2 | 2 | 2 | 2 |
| rs2857101  | 32902654 | TAP2     | 2 | 2 | 2 | 2 | 2 |
| rs10484565 | 32903010 | TAP2     | 2 | 2 | 2 | 2 | 2 |
| rs241454   | 32904122 | TAP2     | 2 | 2 | 2 | 2 | 2 |
| rs241448   | 32904663 | TAP2     | 2 | 2 | 2 | 2 | 2 |
| rs241447   | 32904729 | TAP2     | 2 | 9 | 2 | 9 | 2 |
| rs4148876  | 32904771 | TAP2     | 2 | 2 | 2 | 2 | 2 |
| rs241440   | 32905339 | TAP2     | 2 | 2 | 2 | 2 | 2 |

|            |          |       |   |   |   |   |   |
|------------|----------|-------|---|---|---|---|---|
| rs241438   | 32905598 | TAP2  | 1 | 0 | 1 | 0 | 0 |
| rs241437   | 32905662 | TAP2  | 0 | 0 | 1 | 0 | 0 |
| rs241436   | 32905854 | TAP2  | 1 | 0 | 1 | 0 | 0 |
| rs4576294  | 32906526 | TAP2  | 2 | 2 | 2 | 2 | 2 |
| rs241433   | 32906773 | TAP2  | 2 | 2 | 2 | 2 | 2 |
| rs9469282  | 32908733 | TAP2  | 2 | 2 | 2 | 2 | 2 |
| rs4148871  | 32911294 | TAP2  | 2 | 2 | 2 | 2 | 2 |
| rs241429   | 32911818 | TAP2  | 1 | 0 | 0 | 0 | 0 |
| rs3819721  | 32912776 | TAP2  | 2 | 2 | 2 | 2 | 2 |
| rs241424   | 32912912 | TAP2  | 1 | 0 | 0 | 0 | 0 |
| rs2071465  | 32913448 | TAP2  | 1 | 0 | 0 | 0 | 0 |
| rs2071552  | 32914439 | TAP2  | 1 | 0 | 0 | 0 | 0 |
| rs3763365  | 32915431 | TAP2  | 1 | 2 | 2 | 2 | 2 |
| rs3763364  | 32915498 | TAP2  | 1 | 0 | 0 | 0 | 0 |
| rs9357155  | 32917826 | PSMB8 | 2 | 2 | 2 | 2 | 2 |
| rs6924102  | 32919361 | PSMB8 | 1 | 0 | 0 | 0 | 0 |
| rs2071543  | 32919607 | PSMB8 | 2 | 2 | 2 | 2 | 2 |
| rs2071541  | 32920836 | TAP1  | 2 | 2 | 2 | 2 | 2 |
| rs2071540  | 32920894 | TAP1  | 1 | 2 | 2 | 2 | 2 |
| rs1057373  | 32921257 | TAP1  | 2 | 2 | 2 | 2 | 2 |
| rs1135216  | 32922953 | TAP1  | 2 | 2 | 2 | 2 | 2 |
| rs735883   | 32924032 | TAP1  | 1 | 0 | 0 | 0 | 0 |
| rs2071482  | 32924678 | TAP1  | 2 | 2 | 2 | 2 | 2 |
| rs4148882  | 32924936 | TAP1  | 1 | 2 | 2 | 2 | 2 |
| rs2395269  | 32925752 | TAP1  | 2 | 2 | 2 | 2 | 2 |
| rs2071538  | 32926656 | TAP1  | 1 | 2 | 2 | 2 | 2 |
| rs2071537  | 32926969 | TAP1  | 2 | 2 | 2 | 2 | 2 |
| rs2071481  | 32927843 | TAP1  | 2 | 2 | 2 | 2 | 2 |
| rs2071480  | 32929837 | TAP1  | 1 | 0 | 0 | 0 | 0 |
| rs4713600  | 32930836 | PSMB9 | 1 | 0 | 0 | 0 | 0 |
| rs3763347  | 32930953 | PSMB9 | 1 | 0 | 0 | 0 | 0 |
| rs991760   | 32931545 | PSMB9 | 2 | 2 | 2 | 2 | 2 |
| rs17587    | 32933068 | PSMB9 | 1 | 0 | 0 | 0 | 0 |
| rs9276814  | 32933068 | PSMB9 | 1 | 0 | 0 | 0 | 0 |
| rs2071477  | 32933326 | PSMB9 | 1 | 0 | 0 | 0 | 0 |
| rs2071476  | 32933357 | PSMB9 | 1 | 0 | 0 | 0 | 0 |
| rs7767288  | 32937991 | PSMB9 | 1 | 0 | 0 | 0 | 0 |
| rs1383266  | 32942710 | PSMB9 | 1 | 2 | 2 | 2 | 2 |
| rs10484566 | 32943236 | PSMB9 | 2 | 2 | 2 | 2 | 2 |
| rs12214934 | 32944478 | PSMB9 | 2 | 2 | 2 | 2 | 2 |
| rs6929078  | 32946642 | PSMB9 | 1 | 0 | 0 | 0 | 0 |
| rs6903433  | 32950953 | PSMB9 | 2 | 2 | 2 | 2 | 2 |
| rs7757767  | 32953851 | PSMB9 | 1 | 0 | 0 | 0 | 0 |
| rs2127675  | 32958828 | PSMB9 | 1 | 0 | 0 | 0 | 0 |
| rs4947259  | 32959485 | PSMB9 | 1 | 0 | 0 | 0 | 0 |
| rs2857218  | 32963318 | PSMB9 | 1 | 0 | 0 | 0 | 0 |
| rs2018501  | 32964186 | PSMB9 | 1 | 2 | 2 | 2 | 2 |



|            |          |         |   |   |   |   |   |
|------------|----------|---------|---|---|---|---|---|
| rs1029295  | 32964460 | PSMB9   | 2 | 2 | 2 | 2 | 2 |
| rs241413   | 32966978 | PSMB9   | 1 | 0 | 0 | 0 | 0 |
| rs9469300  | 32968730 | PSMB9   | 2 | 2 | 2 | 2 | 2 |
| rs241410   | 32969629 | PSMB9   | 1 | 2 | 2 | 2 | 2 |
| rs3749981  | 32970660 | PSMB9   | 2 | 2 | 2 | 2 | 2 |
| rs241407   | 32970718 | PSMB9   | 2 | 2 | 2 | 2 | 2 |
| rs241405   | 32973776 | HLA-DMB | 1 | 2 | 2 | 2 | 2 |
| rs241404   | 32973975 | HLA-DMB | 1 | 0 | 0 | 0 | 0 |
| rs9296057  | 32977893 | HLA-DMB | 2 | 2 | 2 | 2 | 2 |
| rs3101942  | 32978035 | HLA-DMB | 1 | 2 | 2 | 2 | 2 |
| rs241398   | 32983428 | HLA-DMB | 1 | 0 | 0 | 0 | 0 |
| rs9501234  | 32984027 | HLA-DMB | 2 | 2 | 2 | 2 | 2 |
| rs154989   | 32985151 | HLA-DMB | 1 | 2 | 2 | 2 | 2 |
| rs7769282  | 32986253 | HLA-DMB | 2 | 2 | 2 | 2 | 2 |
| rs154986   | 32987211 | HLA-DMB | 2 | 2 | 2 | 2 | 2 |
| rs154984   | 32988397 | HLA-DMB | 2 | 2 | 2 | 2 | 2 |
| rs154981   | 32988971 | HLA-DMB | 1 | 2 | 2 | 2 | 2 |
| rs241458   | 32996544 | HLA-DMB | 1 | 2 | 2 | 2 | 2 |
| rs154978   | 33007274 | HLA-DMB | 1 | 2 | 2 | 2 | 2 |
| rs154977   | 33007996 | HLA-DMB | 1 | 1 | 0 | 0 | 0 |
| rs154972   | 33008629 | HLA-DMB | 1 | 1 | 2 | 2 | 2 |
| rs181997   | 33008696 | HLA-DMB | 1 | 1 | 2 | 2 | 2 |
| rs3129299  | 33008765 | HLA-DMB | 2 | 2 | 2 | 2 | 2 |
| rs154971   | 33009633 | HLA-DMB | 2 | 2 | 2 | 2 | 2 |
| rs3132132  | 33009912 | HLA-DMB | 2 | 2 | 2 | 2 | 2 |
| rs10751    | 33010561 | HLA-DMB | 2 | 2 | 2 | 2 | 2 |
| rs151719   | 33011878 | HLA-DMB | 2 | 1 | 2 | 2 | 2 |
| rs1007636  | 33012019 | HLA-DMB | 2 | 2 | 2 | 2 | 2 |
| rs2071556  | 33012579 | HLA-DMB | 2 | 2 | 2 | 2 | 2 |
| rs1042337  | 33012959 | HLA-DMB | 2 | 2 | 2 | 2 | 2 |
| rs714289   | 33013789 | HLA-DMB | 2 | 1 | 2 | 2 | 2 |
| rs2395296  | 33019792 | HLA-DMB | 2 | 2 | 2 | 2 | 1 |
| rs10484567 | 33020530 | HLA-DMB | 2 | 2 | 2 | 2 | 2 |
| rs1480380  | 33021224 | HLA-DMA | 1 | 1 | 0 | 0 | 1 |
| rs194682   | 33022591 | HLA-DMA | 2 | 2 | 2 | 2 | 2 |
| rs3135029  | 33029752 | HLA-DMA | 2 | 2 | 2 | 2 | 2 |
| rs9378127  | 33030437 | HLA-DMA | 2 | 2 | 2 | 2 | 1 |
| rs209473   | 33030886 | HLA-DMA | 1 | 2 | 2 | 2 | 1 |
| rs209474   | 33032562 | HLA-DMA | 2 | 1 | 2 | 2 | 2 |
| rs580962   | 33033670 | HLA-DMA | 1 | 2 | 2 | 2 | 1 |
| rs10484568 | 33043729 | BRD2    | 2 | 2 | 2 | 2 | 2 |
| rs683208   | 33045879 | BRD2    | 2 | 2 | 2 | 2 | 2 |
| rs3130597  | 33049169 | BRD2    | 2 | 2 | 2 | 2 | 2 |
| rs620202   | 33049888 | BRD2    | 2 | 2 | 2 | 2 | 2 |
| rs485502   | 33051323 | BRD2    | 1 | 2 | 2 | 2 | 1 |
| rs3097644  | 33053508 | BRD2    | 2 | 2 | 2 | 2 | 2 |
| rs206781   | 33054111 | BRD2    | 2 | 1 | 2 | 2 | 2 |

|            |          |         |   |   |   |   |   |
|------------|----------|---------|---|---|---|---|---|
| rs2066744  | 33056311 | BRD2    | 2 | 2 | 2 | 2 | 2 |
| rs2071876  | 33056404 | BRD2    | 2 | 2 | 2 | 2 | 2 |
| rs1049414  | 33056585 | BRD2    | 0 | 1 | 0 | 0 | 1 |
| rs1049526  | 33056782 | BRD2    | 2 | 2 | 2 | 2 | 2 |
| rs565876   | 33058028 | BRD2    | 2 | 1 | 2 | 2 | 2 |
| rs3135034  | 33059640 | BRD2    | 2 | 2 | 2 | 2 | 2 |
| rs188245   | 33063954 | BRD2    | 1 | 2 | 2 | 2 | 1 |
| rs206767   | 33070398 | HLA-DOA | 1 | 2 | 2 | 2 | 1 |
| rs206765   | 33072674 | HLA-DOA | 2 | 1 | 2 | 2 | 2 |
| rs176248   | 33073920 | HLA-DOA | 1 | 1 | 1 | 0 | 0 |
| rs2395300  | 33076254 | HLA-DOA | 1 | 0 | 1 | 1 | 1 |
| rs172274   | 33077435 | HLA-DOA | 1 | 0 | 1 | 1 | 1 |
| rs206762   | 33078428 | HLA-DOA | 1 | 2 | 1 | 2 | 1 |
| rs3128931  | 33079686 | HLA-DOA | 2 | 2 | 2 | 1 | 2 |
| rs3128935  | 33080382 | HLA-DOA | 2 | 2 | 2 | 2 | 2 |
| rs1044429  | 33080620 | HLA-DOA | 2 | 1 | 2 | 2 | 2 |
| rs376892   | 33080865 | HLA-DOA | 2 | 2 | 2 | 1 | 2 |
| rs3129304  | 33081721 | HLA-DOA | 2 | 2 | 2 | 2 | 2 |
| rs2581     | 33082379 | HLA-DOA | 1 | 2 | 2 | 1 | 1 |
| rs2582     | 33082529 | HLA-DOA | 2 | 1 | 2 | 2 | 2 |
| rs399604   | 33082992 | HLA-DOA | 1 | 2 | 2 | 1 | 1 |
| rs2284191  | 33084632 | HLA-DOA | 2 | 2 | 1 | 2 | 2 |
| rs86567    | 33084737 | HLA-DOA | 1 | 2 | 2 | 2 | 1 |
| rs403414   | 33085293 | HLA-DOA | 2 | 2 | 1 | 2 | 2 |
| rs381218   | 33085398 | HLA-DOA | 1 | 2 | 2 | 2 | 1 |
| rs6911639  | 33086156 | HLA-DOA | 2 | 2 | 2 | 1 | 2 |
| rs429916   | 33086565 | HLA-DOA | 1 | 1 | 1 | 1 | 1 |
| rs4711313  | 33087724 | HLA-DOA | 1 | 0 | 0 | 0 | 1 |
| rs441126   | 33088556 | HLA-DOA | 2 | 2 | 2 | 2 | 2 |
| rs6457699  | 33089625 | HLA-DOA | 1 | 0 | 0 | 0 | 1 |
| rs413887   | 33090276 | HLA-DOA | 2 | 2 | 2 | 2 | 2 |
| rs9276994  | 33092233 | HLA-DOA | 1 | 0 | 1 | 0 | 1 |
| rs2116264  | 33092766 | HLA-DOA | 2 | 1 | 2 | 2 | 2 |
| rs3130604  | 33093030 | HLA-DOA | 2 | 2 | 2 | 2 | 2 |
| rs1367731  | 33093177 | HLA-DOA | 2 | 2 | 2 | 1 | 2 |
| rs4713605  | 33093970 | HLA-DOA | 1 | 0 | 1 | 0 | 1 |
| rs430188   | 33095520 | HLA-DOA | 2 | 2 | 2 | 2 | 2 |
| rs423639   | 33095752 | HLA-DOA | 2 | 2 | 2 | 2 | 2 |
| rs6457702  | 33096027 | HLA-DOA | 1 | 2 | 2 | 2 | 1 |
| rs9296068  | 33096673 | HLA-DOA | 1 | 0 | 0 | 0 | 1 |
| rs3129301  | 33098038 | HLA-DOA | 2 | 2 | 2 | 2 | 2 |
| rs12055709 | 33101244 | HLA-DOA | 2 | 1 | 1 | 1 | 2 |
| rs9277015  | 33101244 | HLA-DOA | 2 | 1 | 1 | 1 | 2 |
| rs6933546  | 33103992 | HLA-DOA | 2 | 1 | 1 | 1 | 2 |
| rs6920606  | 33105652 | HLA-DOA | 2 | 1 | 1 | 1 | 2 |
| rs9277027  | 33106216 | HLA-DOA | 2 | 1 | 1 | 2 | 2 |
| rs3130171  | 33106707 | HLA-DOA | 0 | 1 | 1 | 1 | 0 |

|            |          |          |   |   |   |   |   |
|------------|----------|----------|---|---|---|---|---|
| rs3135195  | 33107308 | HLA-DOA  | 2 | 2 | 2 | 2 | 2 |
| rs2858458  | 33111043 | HLA-DOA  | 1 | 1 | 1 | 0 | 1 |
| rs423196   | 33111540 | HLA-DOA  | 1 | 1 | 1 | 0 | 1 |
| rs763469   | 33112365 | HLA-DOA  | 2 | 2 | 2 | 2 | 2 |
| rs439852   | 33113186 | HLA-DPA1 | 1 | 1 | 1 | 0 | 1 |
| rs7774158  | 33115730 | HLA-DPA1 | 2 | 1 | 1 | 2 | 2 |
| rs441576   | 33116524 | HLA-DPA1 | 2 | 1 | 1 | 2 | 2 |
| rs375912   | 33124706 | HLA-DPA1 | 2 | 1 | 1 | 2 | 2 |
| rs3130176  | 33125435 | HLA-DPA1 | 1 | 2 | 2 | 2 | 1 |
| rs7738815  | 33128365 | HLA-DPA1 | 2 | 2 | 2 | 2 | 2 |
| rs412735   | 33132110 | HLA-DPA1 | 1 | 1 | 2 | 1 | 1 |
| rs2116263  | 33133471 | HLA-DPA1 | 2 | 2 | 2 | 2 | 2 |
| rs422544   | 33134088 | HLA-DPA1 | 2 | 2 | 1 | 2 | 2 |
| rs2395309  | 33134224 | HLA-DPA1 | 1 | 1 | 1 | 1 | 1 |
| rs588997   | 33136695 | HLA-DPA1 | 1 | 1 | 0 | 1 | 1 |
| rs3077     | 33141000 | HLA-DPA1 | 1 | 1 | 1 | 1 | 1 |
| rs2301226  | 33142574 | HLA-DPA1 | 2 | 2 | 2 | 2 | 2 |
| rs1042178  | 33145500 | HLA-DPA1 | 2 | 2 | 2 | 2 | 2 |
| rs1126534  | 33145617 | HLA-DPA1 | 2 | 2 | 2 | 2 | 2 |
| rs9277341  | 33147603 | HLA-DPA1 | 1 | 1 | 1 | 1 | 1 |
| rs9469343  | 33148191 | HLA-DPA1 | 2 | 2 | 2 | 2 | 2 |
| rs9380340  | 33150269 | HLA-DPA1 | 2 | 2 | 2 | 2 | 2 |
| rs987870   | 33150858 | HLA-DPB1 | 1 | 1 | 1 | 1 | 1 |
| rs2071349  | 33151498 | HLA-DPB1 | 2 | 2 | 2 | 2 | 2 |
| rs3135021  | 33153536 | HLA-DPB1 | 2 | 2 | 1 | 2 | 2 |
| rs3135024  | 33155444 | HLA-DPB1 | 2 | 2 | 2 | 1 | 1 |
| rs3097671  | 33155590 | HLA-DPB1 | 2 | 2 | 2 | 1 | 1 |
| rs1126513  | 33156445 | HLA-DPB1 | 2 | 2 | 2 | 2 | 2 |
| rs1042121  | 33156520 | HLA-DPB1 | 2 | 2 | 2 | 2 | 2 |
| rs7772134  | 33157704 | HLA-DPB1 | 1 | 1 | 1 | 1 | 1 |
| rs9277378  | 33158257 | HLA-DPB1 | 1 | 1 | 1 | 0 | 0 |
| rs1042335  | 33160936 | HLA-DPB1 | 2 | 2 | 2 | 2 | 2 |
| rs14362    | 33160959 | HLA-DPB1 | 2 | 2 | 2 | 2 | 2 |
| rs9277535  | 33162839 | HLA-DPB1 | 2 | 2 | 2 | 1 | 1 |
| rs9277554  | 33163516 | HLA-DPB1 | 1 | 1 | 1 | 0 | 0 |
| rs3128968  | 33164231 | HLA-DPB1 | 2 | 2 | 2 | 1 | 1 |
| rs9277565  | 33164875 | HLA-DPB1 | 2 | 2 | 2 | 1 | 1 |
| rs3091282  | 33165176 | HLA-DPB1 | 1 | 1 | 1 | 0 | 0 |
| rs3117226  | 33165637 | HLA-DPB1 | 1 | 1 | 1 | 0 | 0 |
| rs2068204  | 33166696 | HLA-DPB1 | 2 | 2 | 2 | 2 | 2 |
| rs10484569 | 33166930 | HLA-DPB1 | 2 | 2 | 2 | 2 | 2 |
| rs2281390  | 33167647 | HLA-DPB1 | 2 | 1 | 1 | 2 | 2 |
| rs2281389  | 33167774 | HLA-DPB1 | 2 | 2 | 2 | 1 | 1 |
| rs3128917  | 33167974 | HLA-DPB1 | 1 | 1 | 1 | 0 | 0 |
| rs2281388  | 33168096 | HLA-DPB1 | 2 | 2 | 2 | 2 | 2 |
| rs3117222  | 33168927 | HLA-DPB1 | 1 | 1 | 1 | 0 | 0 |
| rs3128918  | 33169076 | HLA-DPB1 | 2 | 1 | 1 | 2 | 2 |

|            |          |          |   |   |   |   |   |
|------------|----------|----------|---|---|---|---|---|
| rs3130192  | 33169908 | HLA-DPB1 | 2 | 2 | 1 | 2 | 2 |
| rs2395314  | 33170651 | HLA-DPB1 | 1 | 1 | 1 | 0 | 0 |
| rs3117213  | 33172583 | HLA-DPB1 | 1 | 1 | 1 | 0 | 0 |
| rs2064478  | 33180244 | HLA-DPB2 | 1 | 1 | 1 | 0 | 0 |
| rs2064476  | 33181300 | HLA-DPB2 | 1 | 1 | 1 | 0 | 0 |
| rs3117234  | 33181962 | HLA-DPB2 | 1 | 1 | 1 | 0 | 0 |
| rs3130215  | 33182941 | HLA-DPB2 | 1 | 2 | 2 | 2 | 2 |
| rs910320   | 33183421 | HLA-DPB2 | 1 | 1 | 1 | 0 | 0 |
| rs3117230  | 33183613 | HLA-DPB2 | 1 | 1 | 1 | 0 | 0 |
| rs3128930  | 33183644 | HLA-DPB2 | 1 | 1 | 1 | 0 | 0 |
| rs6457713  | 33185754 | HLA-DPB2 | 1 | 1 | 1 | 1 | 1 |
| rs9380343  | 33187144 | HLA-DPB2 | 2 | 2 | 2 | 2 | 2 |
| rs6937061  | 33187790 | HLA-DPB2 | 2 | 2 | 2 | 2 | 2 |
| rs2016780  | 33190449 | HLA-DPB2 | 1 | 2 | 2 | 2 | 2 |
| rs1810472  | 33191099 | HLA-DPB2 | 2 | 2 | 2 | 2 | 2 |
| rs2395349  | 33191112 | HLA-DPB2 | 2 | 2 | 2 | 2 | 2 |
| rs13437613 | 33193686 | HLA-DPB2 | 2 | 2 | 2 | 2 | 2 |
| rs3117035  | 33194227 | HLA-DPB2 | 2 | 2 | 2 | 1 | 1 |
| rs1883414  | 33194426 | HLA-DPB2 | 2 | 2 | 2 | 1 | 1 |
| rs6901092  | 33196953 | HLA-DPB2 | 2 | 2 | 2 | 2 | 2 |
| rs6921644  | 33197082 | HLA-DPB2 | 2 | 2 | 2 | 1 | 1 |
| rs12210068 | 33197174 | HLA-DPB2 | 2 | 2 | 2 | 1 | 1 |
| rs4713607  | 33198814 | HLA-DPB2 | 2 | 2 | 2 | 1 | 1 |
| rs3129274  | 33202847 | HLA-DPB2 | 0 | 1 | 1 | 1 | 1 |
| rs3117016  | 33203494 | HLA-DPB2 | 2 | 2 | 2 | 1 | 1 |
| rs3117008  | 33204252 | HLA-DPB2 | 2 | 2 | 2 | 1 | 1 |
| rs3117004  | 33204744 | HLA-DPB2 | 2 | 2 | 2 | 1 | 1 |
| rs3116998  | 33205209 | HLA-DPB2 | 2 | 2 | 2 | 1 | 1 |
| rs3129270  | 33205401 | HLA-DPB2 | 2 | 2 | 2 | 1 | 1 |
| rs3116996  | 33205942 | HLA-DPB2 | 2 | 2 | 2 | 1 | 1 |
| rs6901221  | 33206254 | HLA-DPB2 | 2 | 2 | 2 | 1 | 1 |
| rs2294479  | 33206367 | HLA-DPB2 | 2 | 2 | 2 | 1 | 1 |
| rs3116994  | 33206775 | HLA-DPB2 | 2 | 1 | 1 | 1 | 1 |
| rs3129267  | 33206874 | HLA-DPB2 | 0 | 1 | 1 | 1 | 1 |
| rs2294478  | 33206944 | HLA-DPB2 | 2 | 1 | 1 | 2 | 2 |
| rs2294477  | 33206966 | HLA-DPB2 | 0 | 1 | 1 | 1 | 1 |
| rs2294472  | 33207188 | HLA-DPB2 | 2 | 1 | 1 | 2 | 2 |
| rs3116985  | 33208568 | HLA-DPB2 | 2 | 2 | 2 | 1 | 1 |
| rs2395352  | 33208710 | HLA-DPB2 | 2 | 1 | 1 | 2 | 2 |
| rs9366816  | 33212153 | HLA-DPB2 | 2 | 1 | 1 | 2 | 2 |
| rs7450904  | 33214309 | HLA-DPB2 | 2 | 2 | 2 | 1 | 1 |
| rs7383503  | 33215439 | HLA-DPB2 | 2 | 2 | 2 | 2 | 2 |
| rs6457721  | 33215729 | HLA-DPB2 | 2 | 1 | 1 | 2 | 2 |
| rs4713610  | 33215933 | HLA-DPB2 | 2 | 2 | 2 | 2 | 2 |
| rs7750683  | 33218812 | HLA-DPB2 | 2 | 1 | 1 | 1 | 1 |
| rs7754200  | 33218911 | HLA-DPB2 | 2 | 2 | 2 | 1 | 1 |
| rs3129234  | 33219325 | HLA-DPB2 | 2 | 2 | 2 | 1 | 1 |

|           |          |          |   |   |   |   |   |
|-----------|----------|----------|---|---|---|---|---|
| rs3129223 | 33221175 | HLA-DPB2 | 2 | 2 | 2 | 1 | 1 |
| rs1003979 | 33222149 | COL11A2  | 0 | 1 | 1 | 1 | 1 |
| rs2395365 | 33224200 | COL11A2  | 2 | 1 | 1 | 1 | 1 |
| rs721394  | 33225796 | COL11A2  | 2 | 1 | 1 | 2 | 2 |
| rs756441  | 33230149 | COL11A2  | 2 | 1 | 1 | 1 | 1 |
| rs756440  | 33230309 | COL11A2  | 2 | 2 | 2 | 1 | 1 |
| rs721844  | 33231510 | COL11A2  | 2 | 2 | 2 | 2 | 2 |
| rs3129207 | 33233290 | COL11A2  | 2 | 2 | 2 | 1 | 1 |
| rs3129203 | 33235735 | COL11A2  | 2 | 2 | 2 | 1 | 1 |
| rs9368757 | 33236355 | COL11A2  | 2 | 1 | 1 | 2 | 2 |
| rs2235498 | 33238408 | COL11A2  | 2 | 2 | 2 | 2 | 2 |
| rs2257126 | 33239712 | COL11A2  | 0 | 1 | 1 | 1 | 1 |
| rs986522  | 33243940 | COL11A2  | 2 | 1 | 1 | 2 | 2 |
| rs986521  | 33244123 | COL11A2  | 1 | 2 | 2 | 2 | 2 |
| rs2229784 | 33244288 | COL11A2  | 2 | 2 | 2 | 2 | 2 |
| rs2855442 | 33245381 | COL11A2  | 1 | 2 | 2 | 2 | 2 |
| rs9368758 | 33245999 | COL11A2  | 2 | 2 | 2 | 2 | 2 |
| rs2855437 | 33246933 | COL11A2  | 1 | 2 | 2 | 2 | 2 |
| rs973233  | 33247987 | COL11A2  | 1 | 2 | 2 | 2 | 2 |
| rs9277932 | 33249231 | COL11A2  | 1 | 2 | 2 | 1 | 1 |
| rs2855430 | 33249258 | COL11A2  | 2 | 2 | 2 | 1 | 1 |
| rs2744512 | 33249898 | COL11A2  | 1 | 2 | 2 | 2 | 2 |
| rs3762013 | 33250517 | COL11A2  | 1 | 2 | 2 | 1 | 1 |
| rs2855425 | 33252351 | COL11A2  | 1 | 2 | 2 | 2 | 2 |
| rs2855417 | 33256626 | COL11A2  | 2 | 2 | 2 | 2 | 2 |
| rs2855459 | 33262634 | COL11A2  | 2 | 2 | 2 | 1 | 1 |
| rs2269346 | 33266876 | COL11A2  | 2 | 2 | 2 | 2 | 2 |



















|   |   |   |   |   |   |   |   |   |
|---|---|---|---|---|---|---|---|---|
| 2 | 2 | 2 | 2 | 2 | 2 | 2 | 2 | 2 |
| 2 | 2 | 2 | 2 | 2 | 2 | 2 | 2 | 2 |
| 2 | 2 | 2 | 2 | 2 | 2 | 2 | 2 | 2 |
| 2 | 2 | 2 | 2 | 2 | 2 | 2 | 2 | 2 |
| 2 | 2 | 2 | 2 | 2 | 2 | 2 | 2 | 2 |
| 1 | 0 | 0 | 0 | 0 | 0 | 0 | 1 | 0 |
| 2 | 2 | 2 | 2 | 2 | 2 | 2 | 2 | 2 |
| 1 | 2 | 2 | 2 | 2 | 2 | 2 | 2 | 2 |
| 1 | 0 | 0 | 0 | 0 | 0 | 0 | 0 | 0 |
| 2 | 2 | 2 | 2 | 2 | 2 | 2 | 2 | 2 |
| 2 | 2 | 2 | 2 | 2 | 2 | 2 | 1 | 2 |
| 2 | 2 | 2 | 2 | 2 | 2 | 2 | 2 | 2 |
| 2 | 2 | 2 | 2 | 2 | 2 | 2 | 2 | 2 |
| 2 | 2 | 2 | 2 | 2 | 2 | 2 | 2 | 2 |
| 2 | 2 | 2 | 2 | 2 | 2 | 2 | 1 | 2 |
| 1 | 0 | 0 | 0 | 0 | 0 | 0 | 1 | 0 |
| 1 | 0 | 0 | 0 | 0 | 0 | 0 | 0 | 0 |
| 2 | 2 | 2 | 2 | 2 | 2 | 2 | 1 | 2 |
| 2 | 2 | 2 | 2 | 2 | 2 | 2 | 2 | 2 |
| 1 | 0 | 0 | 0 | 0 | 0 | 0 | 0 | 0 |
| 1 | 0 | 0 | 0 | 0 | 0 | 0 | 0 | 0 |
| 2 | 2 | 2 | 2 | 2 | 2 | 2 | 1 | 2 |
| 2 | 2 | 2 | 2 | 2 | 2 | 2 | 2 | 2 |
| 1 | 0 | 0 | 0 | 0 | 0 | 0 | 1 | 0 |
| 1 | 0 | 0 | 0 | 0 | 0 | 0 | 1 | 0 |
| 1 | 0 | 0 | 0 | 0 | 0 | 0 | 0 | 0 |
| 2 | 2 | 2 | 2 | 2 | 2 | 2 | 2 | 2 |
| 2 | 2 | 2 | 2 | 2 | 2 | 2 | 2 | 2 |
| 2 | 2 | 2 | 2 | 2 | 2 | 2 | 2 | 2 |
| 1 | 0 | 0 | 0 | 0 | 1 | 0 | 1 | 0 |
| 2 | 2 | 2 | 2 | 2 | 2 | 2 | 2 | 2 |
| 1 | 0 | 0 | 0 | 0 | 1 | 0 | 1 | 0 |
| 2 | 2 | 2 | 2 | 2 | 2 | 2 | 2 | 2 |
| 2 | 2 | 2 | 2 | 2 | 2 | 2 | 2 | 2 |
| 1 | 2 | 2 | 2 | 2 | 1 | 2 | 2 | 2 |
| 1 | 0 | 0 | 0 | 0 | 1 | 0 | 1 | 0 |
| 2 | 2 | 2 | 2 | 2 | 2 | 2 | 2 | 2 |
| 2 | 2 | 2 | 2 | 2 | 2 | 2 | 1 | 2 |
| 1 | 0 | 0 | 0 | 0 | 1 | 0 | 1 | 0 |
| 1 | 0 | 0 | 0 | 0 | 1 | 0 | 1 | 0 |
| 2 | 2 | 2 | 2 | 2 | 2 | 2 | 2 | 2 |
| 2 | 2 | 2 | 2 | 2 | 2 | 2 | 2 | 2 |
| 1 | 2 | 2 | 2 | 2 | 2 | 2 | 2 | 2 |
| 1 | 2 | 2 | 2 | 2 | 1 | 2 | 2 | 2 |
| 2 | 2 | 2 | 2 | 2 | 2 | 2 | 2 | 2 |
| 1 | 0 | 0 | 0 | 0 | 1 | 0 | 1 | 0 |
| 1 | 0 | 0 | 0 | 0 | 1 | 0 | 1 | 0 |







|   |   |   |   |   |   |   |   |   |
|---|---|---|---|---|---|---|---|---|
| 0 | 0 | 0 | 0 | 0 | 1 | 0 | 1 | 0 |
| 2 | 2 | 2 | 2 | 2 | 2 | 2 | 2 | 2 |
| 2 | 2 | 2 | 2 | 2 | 2 | 2 | 2 | 2 |
| 2 | 2 | 2 | 2 | 2 | 2 | 2 | 2 | 2 |
| 2 | 2 | 2 | 2 | 2 | 1 | 2 | 2 | 2 |
| 2 | 2 | 2 | 2 | 2 | 2 | 2 | 2 | 2 |
| 2 | 2 | 2 | 2 | 2 | 2 | 2 | 2 | 2 |
| 2 | 2 | 2 | 2 | 2 | 1 | 2 | 2 | 2 |
| 2 | 2 | 2 | 2 | 2 | 2 | 2 | 2 | 2 |
| 0 | 0 | 0 | 0 | 0 | 1 | 0 | 1 | 0 |
| 2 | 2 | 2 | 2 | 2 | 2 | 2 | 2 | 2 |
| 2 | 2 | 2 | 2 | 2 | 2 | 2 | 2 | 2 |
| 2 | 2 | 2 | 2 | 2 | 2 | 2 | 2 | 2 |
| 2 | 2 | 2 | 2 | 2 | 2 | 2 | 2 | 2 |
| 2 | 2 | 2 | 2 | 2 | 2 | 2 | 2 | 2 |
| 2 | 2 | 2 | 2 | 2 | 2 | 2 | 2 | 2 |
| 0 | 0 | 0 | 0 | 0 | 1 | 0 | 1 | 0 |
| 0 | 0 | 0 | 0 | 0 | 1 | 0 | 1 | 0 |
| 2 | 2 | 2 | 2 | 2 | 2 | 2 | 2 | 2 |
| 2 | 2 | 2 | 2 | 2 | 2 | 2 | 2 | 2 |
| 2 | 2 | 2 | 2 | 2 | 1 | 2 | 2 | 2 |
| 2 | 2 | 2 | 2 | 2 | 2 | 2 | 2 | 2 |
| 2 | 2 | 2 | 2 | 2 | 2 | 2 | 1 | 2 |
| 2 | 2 | 2 | 2 | 2 | 2 | 2 | 2 | 2 |
| 2 | 2 | 2 | 2 | 2 | 2 | 2 | 1 | 2 |
| 2 | 2 | 2 | 2 | 2 | 2 | 2 | 2 | 2 |
| 2 | 2 | 2 | 2 | 2 | 2 | 2 | 2 | 2 |
| 2 | 2 | 2 | 2 | 2 | 1 | 2 | 2 | 2 |
| 2 | 2 | 2 | 2 | 2 | 2 | 2 | 2 | 2 |
| 2 | 2 | 2 | 2 | 2 | 2 | 2 | 1 | 2 |
| 2 | 2 | 2 | 2 | 2 | 2 | 2 | 2 | 2 |
| 2 | 2 | 2 | 2 | 2 | 2 | 2 | 2 | 2 |
| 2 | 2 | 2 | 2 | 2 | 2 | 2 | 2 | 2 |
| 2 | 2 | 2 | 2 | 2 | 2 | 2 | 2 | 2 |
| 0 | 0 | 0 | 0 | 0 | 0 | 0 | 1 | 0 |
| 2 | 2 | 2 | 2 | 2 | 2 | 2 | 2 | 2 |
| 2 | 2 | 2 | 2 | 2 | 2 | 2 | 2 | 2 |
| 2 | 2 | 2 | 2 | 2 | 2 | 2 | 2 | 2 |
| 2 | 2 | 2 | 2 | 2 | 2 | 2 | 2 | 2 |
| 2 | 2 | 2 | 2 | 2 | 2 | 2 | 2 | 2 |
| 2 | 2 | 2 | 2 | 2 | 2 | 2 | 2 | 2 |
| 2 | 2 | 2 | 2 | 2 | 2 | 2 | 2 | 2 |
| 2 | 2 | 2 | 2 | 2 | 2 | 2 | 2 | 2 |
| 2 | 2 | 2 | 2 | 2 | 2 | 2 | 2 | 2 |
| 0 | 9 | 0 | 0 | 0 | 0 | 0 | 0 | 0 |











































|   |   |   |   |   |   |   |   |   |
|---|---|---|---|---|---|---|---|---|
| 0 | 0 | 0 | 0 | 0 | 0 | 0 | 0 | 0 |
| 0 | 0 | 0 | 0 | 0 | 0 | 0 | 0 | 0 |
| 0 | 0 | 0 | 0 | 0 | 0 | 0 | 0 | 0 |
| 2 | 2 | 2 | 2 | 2 | 2 | 2 | 2 | 2 |
| 2 | 2 | 2 | 2 | 1 | 2 | 2 | 2 | 2 |
| 2 | 2 | 2 | 2 | 2 | 2 | 2 | 2 | 2 |
| 2 | 2 | 2 | 2 | 1 | 2 | 2 | 2 | 2 |
| 0 | 0 | 0 | 0 | 1 | 0 | 1 | 0 | 0 |
| 2 | 2 | 2 | 2 | 2 | 2 | 0 | 2 | 2 |
| 0 | 1 | 0 | 0 | 1 | 0 | 1 | 1 | 0 |
| 0 | 1 | 0 | 0 | 0 | 0 | 2 | 1 | 0 |
| 0 | 1 | 0 | 1 | 0 | 1 | 1 | 1 | 0 |
| 2 | 1 | 2 | 1 | 2 | 1 | 1 | 1 | 2 |
| 0 | 1 | 0 | 1 | 0 | 1 | 2 | 1 | 0 |
| 2 | 2 | 2 | 2 | 2 | 2 | 2 | 2 | 2 |
| 0 | 1 | 0 | 1 | 0 | 1 | 2 | 1 | 0 |
| 2 | 2 | 2 | 2 | 2 | 2 | 2 | 2 | 2 |
| 2 | 2 | 2 | 2 | 2 | 2 | 1 | 2 | 2 |
| 2 | 1 | 2 | 1 | 2 | 1 | 2 | 1 | 2 |
| 2 | 2 | 2 | 2 | 2 | 2 | 2 | 2 | 2 |
| 2 | 2 | 2 | 2 | 2 | 2 | 1 | 2 | 2 |
| 0 | 1 | 0 | 1 | 0 | 1 | 2 | 1 | 0 |
| 2 | 2 | 2 | 2 | 2 | 2 | 0 | 2 | 2 |
| 2 | 1 | 2 | 1 | 2 | 1 | 2 | 1 | 2 |
| 2 | 2 | 2 | 2 | 2 | 2 | 0 | 2 | 2 |
| 2 | 1 | 2 | 2 | 2 | 2 | 2 | 2 | 2 |
| 2 | 2 | 2 | 2 | 2 | 2 | 2 | 2 | 2 |
| 2 | 2 | 2 | 2 | 2 | 2 | 9 | 2 | 2 |
| 0 | 1 | 0 | 1 | 0 | 1 | 0 | 1 | 0 |
| 0 | 1 | 0 | 1 | 0 | 1 | 0 | 1 | 0 |
| 0 | 1 | 0 | 1 | 0 | 1 | 0 | 1 | 0 |
| 2 | 2 | 2 | 2 | 2 | 2 | 1 | 2 | 2 |
| 0 | 1 | 0 | 1 | 0 | 1 | 2 | 1 | 0 |
| 0 | 1 | 0 | 1 | 0 | 1 | 2 | 1 | 0 |
| 0 | 1 | 0 | 1 | 0 | 1 | 0 | 1 | 0 |
| 0 | 1 | 0 | 1 | 0 | 1 | 0 | 1 | 0 |
| 2 | 1 | 2 | 2 | 2 | 2 | 2 | 2 | 2 |
| 2 | 2 | 2 | 2 | 2 | 2 | 1 | 2 | 2 |
| 2 | 2 | 2 | 2 | 2 | 2 | 2 | 2 | 2 |
| 0 | 1 | 0 | 1 | 0 | 1 | 1 | 1 | 0 |
| 2 | 2 | 2 | 2 | 2 | 2 | 2 | 2 | 2 |
| 0 | 1 | 0 | 1 | 0 | 1 | 1 | 1 | 9 |
| 0 | 1 | 0 | 1 | 0 | 1 | 1 | 1 | 0 |
| 0 | 1 | 0 | 1 | 0 | 1 | 1 | 1 | 0 |
| 0 | 1 | 0 | 1 | 0 | 1 | 2 | 1 | 0 |
| 2 | 1 | 2 | 1 | 2 | 1 | 2 | 1 | 2 |

|   |   |   |   |   |   |   |   |   |
|---|---|---|---|---|---|---|---|---|
| 2 | 2 | 2 | 2 | 2 | 2 | 1 | 2 | 2 |
| 0 | 1 | 0 | 1 | 0 | 1 | 1 | 1 | 0 |
| 2 | 2 | 2 | 2 | 2 | 2 | 1 | 2 | 2 |
| 2 | 1 | 2 | 1 | 2 | 1 | 1 | 1 | 2 |
| 2 | 2 | 2 | 2 | 2 | 2 | 2 | 2 | 2 |
| 2 | 2 | 2 | 2 | 2 | 2 | 2 | 2 | 2 |
| 2 | 1 | 2 | 1 | 2 | 1 | 2 | 1 | 2 |
| 0 | 1 | 0 | 1 | 0 | 1 | 1 | 1 | 0 |
| 2 | 2 | 2 | 2 | 2 | 2 | 1 | 2 | 2 |
| 2 | 1 | 2 | 1 | 2 | 1 | 2 | 1 | 2 |
| 0 | 1 | 0 | 1 | 0 | 1 | 1 | 1 | 0 |
| 2 | 2 | 2 | 2 | 2 | 2 | 1 | 2 | 2 |
| 2 | 1 | 2 | 1 | 2 | 1 | 2 | 1 | 2 |
| 2 | 2 | 2 | 2 | 2 | 2 | 2 | 2 | 2 |
| 2 | 2 | 2 | 2 | 2 | 2 | 1 | 2 | 2 |
| 2 | 2 | 2 | 2 | 2 | 2 | 1 | 2 | 2 |
| 2 | 1 | 2 | 1 | 2 | 1 | 2 | 1 | 2 |
| 2 | 1 | 2 | 1 | 2 | 1 | 2 | 1 | 2 |
| 0 | 1 | 0 | 0 | 1 | 0 | 2 | 0 | 0 |
| 2 | 2 | 2 | 2 | 2 | 2 | 2 | 2 | 2 |
| 2 | 2 | 2 | 2 | 2 | 2 | 2 | 2 | 2 |
| 2 | 2 | 2 | 2 | 2 | 2 | 2 | 2 | 2 |
| 2 | 2 | 2 | 2 | 2 | 2 | 2 | 2 | 2 |
| 2 | 2 | 2 | 2 | 2 | 2 | 2 | 2 | 2 |
| 2 | 2 | 2 | 1 | 2 | 1 | 1 | 1 | 2 |
| 2 | 2 | 2 | 2 | 2 | 2 | 2 | 2 | 2 |
| 2 | 9 | 2 | 1 | 2 | 1 | 2 | 1 | 9 |
| 2 | 2 | 2 | 1 | 2 | 1 | 2 | 1 | 2 |
| 2 | 2 | 2 | 2 | 2 | 2 | 2 | 2 | 2 |
| 2 | 2 | 2 | 1 | 2 | 1 | 2 | 1 | 2 |
| 2 | 2 | 2 | 2 | 2 | 2 | 2 | 2 | 2 |
| 0 | 1 | 0 | 1 | 1 | 2 | 2 | 1 | 1 |
| 2 | 2 | 2 | 2 | 2 | 1 | 1 | 2 | 1 |
| 2 | 2 | 2 | 1 | 2 | 1 | 2 | 1 | 2 |
| 2 | 2 | 2 | 2 | 2 | 2 | 2 | 2 | 2 |
| 2 | 1 | 2 | 1 | 1 | 1 | 2 | 1 | 2 |
| 2 | 2 | 2 | 2 | 2 | 1 | 1 | 2 | 1 |
| 2 | 1 | 2 | 1 | 1 | 1 | 2 | 1 | 2 |
| 2 | 2 | 2 | 2 | 2 | 2 | 1 | 2 | 2 |
| 2 | 2 | 2 | 2 | 2 | 1 | 1 | 2 | 1 |
| 2 | 2 | 2 | 1 | 2 | 1 | 2 | 1 | 2 |
| 2 | 2 | 2 | 2 | 2 | 1 | 1 | 2 | 1 |
| 2 | 1 | 2 | 1 | 1 | 1 | 1 | 1 | 2 |
| 2 | 2 | 2 | 1 | 2 | 1 | 2 | 1 | 2 |
| 2 | 2 | 2 | 2 | 2 | 1 | 1 | 2 | 1 |

|   |   |   |   |   |   |   |   |   |
|---|---|---|---|---|---|---|---|---|
| 2 | 2 | 2 | 2 | 2 | 2 | 2 | 2 | 2 |
| 2 | 2 | 2 | 2 | 2 | 2 | 2 | 2 | 2 |
| 0 | 0 | 0 | 0 | 1 | 1 | 2 | 0 | 1 |
| 2 | 2 | 2 | 1 | 2 | 1 | 2 | 1 | 2 |
| 2 | 9 | 2 | 2 | 2 | 1 | 1 | 2 | 1 |
| 2 | 2 | 2 | 2 | 2 | 2 | 2 | 2 | 2 |
| 2 | 1 | 2 | 1 | 1 | 1 | 1 | 1 | 2 |
| 2 | 1 | 2 | 1 | 1 | 1 | 1 | 1 | 2 |
| 2 | 2 | 2 | 2 | 2 | 1 | 1 | 2 | 1 |
| 0 | 1 | 1 | 0 | 2 | 2 | 2 | 1 | 2 |
| 0 | 0 | 1 | 0 | 2 | 2 | 2 | 1 | 1 |
| 0 | 0 | 1 | 0 | 2 | 2 | 2 | 1 | 1 |
| 2 | 9 | 1 | 2 | 0 | 0 | 0 | 1 | 1 |
| 2 | 2 | 2 | 2 | 2 | 2 | 2 | 2 | 2 |
| 2 | 2 | 2 | 2 | 2 | 2 | 2 | 2 | 2 |
| 2 | 1 | 2 | 1 | 2 | 2 | 2 | 2 | 1 |
| 2 | 2 | 2 | 2 | 2 | 2 | 2 | 2 | 2 |
| 2 | 2 | 1 | 2 | 1 | 1 | 2 | 1 | 1 |
| 2 | 2 | 2 | 2 | 1 | 1 | 1 | 2 | 2 |
| 2 | 1 | 2 | 1 | 2 | 2 | 2 | 2 | 2 |
| 2 | 2 | 2 | 2 | 1 | 1 | 1 | 2 | 2 |
| 2 | 9 | 2 | 2 | 2 | 2 | 1 | 2 | 2 |
| 2 | 2 | 1 | 2 | 0 | 0 | 1 | 1 | 1 |
| 2 | 2 | 2 | 2 | 2 | 2 | 1 | 2 | 1 |
| 2 | 2 | 2 | 2 | 1 | 1 | 1 | 2 | 2 |
| 2 | 2 | 2 | 2 | 2 | 2 | 2 | 2 | 2 |
| 0 | 9 | 1 | 1 | 2 | 2 | 2 | 1 | 2 |
| 0 | 0 | 1 | 0 | 2 | 2 | 1 | 1 | 2 |
| 2 | 2 | 2 | 2 | 2 | 2 | 2 | 2 | 2 |
| 0 | 0 | 1 | 0 | 2 | 2 | 1 | 1 | 2 |
| 2 | 2 | 2 | 2 | 2 | 2 | 2 | 2 | 2 |
| 0 | 0 | 1 | 0 | 2 | 2 | 2 | 1 | 2 |
| 2 | 1 | 2 | 1 | 2 | 2 | 2 | 2 | 2 |
| 2 | 2 | 1 | 2 | 1 | 1 | 2 | 1 | 1 |
| 2 | 2 | 2 | 2 | 2 | 2 | 2 | 2 | 2 |
| 0 | 0 | 1 | 0 | 2 | 2 | 2 | 1 | 2 |
| 2 | 2 | 2 | 2 | 2 | 2 | 2 | 2 | 2 |
| 2 | 2 | 2 | 2 | 2 | 2 | 2 | 2 | 2 |
| 2 | 2 | 1 | 2 | 0 | 0 | 1 | 1 | 1 |
| 0 | 0 | 1 | 0 | 2 | 2 | 1 | 1 | 2 |
| 2 | 2 | 2 | 2 | 2 | 2 | 2 | 2 | 2 |
| 2 | 1 | 2 | 1 | 2 | 2 | 1 | 2 | 2 |
| 2 | 1 | 2 | 1 | 2 | 2 | 1 | 2 | 2 |
| 2 | 1 | 2 | 1 | 2 | 2 | 1 | 2 | 2 |
| 2 | 1 | 2 | 2 | 2 | 2 | 1 | 2 | 2 |
| 0 | 1 | 1 | 1 | 1 | 1 | 1 | 1 | 1 |

|   |   |   |   |   |   |   |   |   |
|---|---|---|---|---|---|---|---|---|
| 2 | 2 | 2 | 2 | 2 | 2 | 2 | 2 | 2 |
| 0 | 1 | 1 | 0 | 2 | 2 | 2 | 1 | 2 |
| 0 | 1 | 1 | 0 | 2 | 2 | 2 | 1 | 2 |
| 2 | 9 | 1 | 2 | 1 | 1 | 2 | 1 | 9 |
| 0 | 1 | 1 | 0 | 2 | 2 | 2 | 1 | 2 |
| 2 | 0 | 2 | 2 | 2 | 2 | 1 | 2 | 2 |
| 2 | 1 | 2 | 2 | 2 | 2 | 1 | 2 | 2 |
| 2 | 1 | 2 | 2 | 2 | 2 | 1 | 2 | 2 |
| 2 | 2 | 1 | 2 | 0 | 0 | 1 | 1 | 0 |
| 2 | 2 | 2 | 2 | 2 | 2 | 2 | 2 | 2 |
| 2 | 2 | 2 | 1 | 2 | 2 | 1 | 2 | 1 |
| 2 | 2 | 2 | 2 | 2 | 2 | 2 | 2 | 2 |
| 2 | 2 | 2 | 2 | 2 | 2 | 2 | 2 | 2 |
| 2 | 2 | 1 | 1 | 2 | 2 | 1 | 2 | 1 |
| 0 | 1 | 1 | 1 | 2 | 2 | 2 | 1 | 2 |
| 0 | 1 | 0 | 0 | 2 | 2 | 1 | 1 | 1 |
| 0 | 1 | 1 | 1 | 2 | 2 | 2 | 1 | 2 |
| 2 | 2 | 2 | 2 | 2 | 2 | 2 | 2 | 2 |
| 2 | 2 | 2 | 2 | 2 | 2 | 2 | 2 | 2 |
| 2 | 2 | 2 | 2 | 2 | 2 | 2 | 2 | 2 |
| 0 | 1 | 1 | 1 | 2 | 2 | 2 | 1 | 2 |
| 2 | 2 | 2 | 2 | 2 | 2 | 2 | 2 | 2 |
| 2 | 2 | 2 | 2 | 2 | 2 | 2 | 2 | 2 |
| 0 | 9 | 1 | 1 | 2 | 2 | 2 | 1 | 2 |
| 2 | 2 | 2 | 2 | 2 | 2 | 2 | 2 | 2 |
| 2 | 2 | 1 | 1 | 2 | 2 | 1 | 2 | 1 |
| 1 | 2 | 2 | 2 | 1 | 2 | 2 | 2 | 1 |
| 2 | 2 | 2 | 2 | 1 | 2 | 2 | 2 | 1 |
| 2 | 2 | 2 | 2 | 2 | 2 | 2 | 2 | 2 |
| 2 | 2 | 2 | 2 | 2 | 2 | 2 | 2 | 2 |
| 0 | 1 | 1 | 1 | 2 | 2 | 2 | 1 | 2 |
| 0 | 1 | 1 | 1 | 1 | 2 | 2 | 1 | 1 |
| 2 | 2 | 2 | 2 | 2 | 2 | 2 | 2 | 2 |
| 2 | 2 | 2 | 2 | 2 | 2 | 2 | 2 | 2 |
| 1 | 2 | 2 | 2 | 1 | 2 | 2 | 2 | 1 |
| 0 | 1 | 1 | 1 | 1 | 2 | 2 | 1 | 1 |
| 1 | 2 | 2 | 2 | 1 | 2 | 2 | 2 | 1 |
| 2 | 2 | 2 | 2 | 1 | 2 | 2 | 2 | 1 |
| 0 | 1 | 1 | 1 | 1 | 2 | 2 | 1 | 1 |
| 1 | 1 | 1 | 1 | 1 | 2 | 2 | 1 | 1 |
| 2 | 2 | 2 | 2 | 2 | 2 | 2 | 2 | 2 |
| 2 | 2 | 2 | 2 | 2 | 2 | 2 | 2 | 2 |
| 2 | 2 | 1 | 1 | 2 | 2 | 1 | 2 | 1 |
| 2 | 2 | 2 | 2 | 1 | 2 | 2 | 2 | 1 |
| 1 | 1 | 1 | 1 | 1 | 2 | 2 | 1 | 1 |
| 2 | 2 | 2 | 2 | 2 | 2 | 2 | 2 | 2 |
| 1 | 1 | 1 | 1 | 1 | 2 | 2 | 1 | 1 |
| 2 | 2 | 2 | 2 | 2 | 2 | 2 | 2 | 2 |
| 1 | 1 | 1 | 1 | 1 | 2 | 2 | 1 | 1 |
| 2 | 2 | 1 | 1 | 2 | 2 | 1 | 2 | 1 |



|   |   |   |   |   |   |   |   |   |
|---|---|---|---|---|---|---|---|---|
| 2 | 2 | 1 | 1 | 2 | 2 | 1 | 2 | 1 |
| 1 | 1 | 1 | 1 | 1 | 2 | 2 | 1 | 1 |
| 1 | 1 | 1 | 1 | 1 | 2 | 2 | 1 | 1 |
| 1 | 1 | 1 | 1 | 1 | 2 | 2 | 1 | 1 |
| 0 | 1 | 1 | 1 | 1 | 2 | 2 | 1 | 1 |
| 1 | 1 | 1 | 1 | 1 | 2 | 2 | 1 | 1 |
| 2 | 1 | 2 | 2 | 1 | 0 | 1 | 1 | 2 |
| 1 | 1 | 1 | 1 | 1 | 2 | 2 | 1 | 1 |
| 1 | 1 | 1 | 1 | 1 | 2 | 2 | 1 | 1 |
| 0 | 1 | 1 | 1 | 1 | 2 | 2 | 1 | 1 |
| 1 | 1 | 1 | 1 | 2 | 2 | 2 | 1 | 2 |
| 2 | 2 | 2 | 2 | 2 | 2 | 2 | 2 | 2 |
| 2 | 2 | 2 | 2 | 2 | 2 | 2 | 2 | 2 |
| 2 | 1 | 2 | 2 | 1 | 0 | 1 | 1 | 2 |
| 1 | 2 | 2 | 2 | 2 | 2 | 2 | 2 | 2 |
| 2 | 2 | 2 | 2 | 2 | 2 | 2 | 2 | 2 |
| 2 | 2 | 2 | 2 | 2 | 2 | 2 | 2 | 2 |
| 2 | 2 | 2 | 2 | 1 | 2 | 2 | 2 | 1 |
| 1 | 2 | 2 | 2 | 1 | 2 | 2 | 2 | 1 |
| 2 | 2 | 2 | 2 | 2 | 2 | 2 | 2 | 2 |
| 2 | 2 | 2 | 2 | 1 | 2 | 2 | 2 | 1 |
| 2 | 2 | 2 | 2 | 1 | 2 | 2 | 2 | 1 |
| 2 | 2 | 2 | 2 | 1 | 2 | 2 | 2 | 1 |
| 2 | 2 | 2 | 2 | 1 | 2 | 2 | 2 | 1 |
| 2 | 2 | 2 | 2 | 1 | 2 | 2 | 2 | 1 |
| 2 | 2 | 2 | 2 | 1 | 2 | 2 | 2 | 1 |
| 2 | 2 | 2 | 2 | 1 | 2 | 2 | 2 | 1 |
| 2 | 2 | 2 | 2 | 1 | 2 | 2 | 2 | 1 |
| 1 | 0 | 1 | 1 | 1 | 0 | 1 | 0 | 2 |
| 2 | 2 | 2 | 2 | 1 | 2 | 2 | 2 | 9 |
| 2 | 2 | 2 | 2 | 1 | 2 | 2 | 2 | 1 |
| 2 | 2 | 2 | 2 | 1 | 2 | 2 | 2 | 1 |
| 2 | 2 | 2 | 2 | 1 | 2 | 2 | 2 | 1 |
| 2 | 2 | 2 | 2 | 1 | 2 | 2 | 2 | 1 |
| 2 | 2 | 2 | 2 | 1 | 2 | 2 | 2 | 1 |
| 2 | 2 | 2 | 2 | 1 | 2 | 2 | 2 | 1 |
| 1 | 2 | 1 | 1 | 1 | 2 | 1 | 2 | 0 |
| 1 | 0 | 1 | 1 | 1 | 0 | 1 | 0 | 2 |
| 1 | 2 | 1 | 1 | 2 | 2 | 1 | 2 | 1 |
| 1 | 0 | 1 | 1 | 1 | 0 | 1 | 0 | 2 |
| 1 | 2 | 1 | 1 | 2 | 2 | 1 | 2 | 1 |
| 2 | 2 | 2 | 2 | 1 | 2 | 2 | 2 | 1 |
| 1 | 2 | 1 | 1 | 2 | 2 | 1 | 2 | 1 |
| 1 | 2 | 1 | 1 | 2 | 2 | 1 | 2 | 1 |
| 2 | 2 | 2 | 2 | 1 | 2 | 2 | 2 | 1 |
| 2 | 2 | 2 | 2 | 2 | 2 | 2 | 2 | 2 |
| 1 | 2 | 1 | 1 | 2 | 2 | 1 | 2 | 1 |
| 2 | 2 | 2 | 2 | 2 | 2 | 2 | 2 | 2 |
| 1 | 2 | 1 | 1 | 1 | 2 | 1 | 2 | 0 |
| 2 | 2 | 2 | 2 | 1 | 2 | 2 | 2 | 1 |
| 2 | 2 | 2 | 2 | 1 | 2 | 2 | 2 | 1 |



| SWEIGAD-226 | SWEIGAD-228 | SWEIGAD-245 | SWEIGAD-268 | RAWGS0753 | RAWGS0754 | RAWGS0789 | RAWGS0880 | RAWGS0992 |
|-------------|-------------|-------------|-------------|-----------|-----------|-----------|-----------|-----------|
| 1           | 0           | 1           | 1           | 0         | 0         | 1         | 1         | 1         |
| 1           | 0           | 1           | 1           | 0         | 0         | 1         | 1         | 1         |
| 2           | 2           | 2           | 2           | 2         | 2         | 2         | 2         | 2         |
| 1           | 2           | 2           | 1           | 2         | 2         | 1         | 2         | 2         |
| 1           | 0           | 1           | 1           | 0         | 0         | 1         | 1         | 1         |
| 2           | 2           | 1           | 2           | 2         | 2         | 2         | 1         | 1         |
| 2           | 2           | 1           | 2           | 2         | 2         | 2         | 1         | 1         |
| 1           | 0           | 1           | 1           | 0         | 0         | 1         | 1         | 1         |
| 2           | 2           | 2           | 2           | 2         | 2         | 2         | 2         | 2         |
| 1           | 2           | 2           | 1           | 2         | 2         | 1         | 2         | 2         |
| 1           | 0           | 1           | 1           | 0         | 0         | 1         | 1         | 1         |
| 2           | 2           | 1           | 2           | 2         | 2         | 2         | 1         | 1         |
| 1           | 2           | 2           | 1           | 2         | 2         | 1         | 2         | 2         |
| 1           | 0           | 1           | 1           | 0         | 0         | 1         | 1         | 1         |
| 1           | 0           | 1           | 1           | 0         | 0         | 1         | 1         | 1         |
| 1           | 0           | 1           | 1           | 0         | 0         | 1         | 1         | 1         |
| 1           | 0           | 1           | 1           | 0         | 0         | 1         | 1         | 1         |
| 1           | 2           | 2           | 1           | 2         | 2         | 1         | 2         | 2         |
| 1           | 2           | 2           | 1           | 2         | 2         | 1         | 2         | 2         |
| 1           | 0           | 1           | 1           | 0         | 0         | 9         | 1         | 1         |
| 1           | 0           | 1           | 1           | 0         | 0         | 1         | 1         | 1         |
| 1           | 0           | 1           | 1           | 0         | 0         | 1         | 1         | 1         |
| 1           | 0           | 1           | 1           | 0         | 0         | 1         | 1         | 1         |
| 1           | 0           | 0           | 1           | 0         | 0         | 1         | 1         | 1         |
| 1           | 0           | 0           | 1           | 0         | 0         | 1         | 1         | 1         |
| 1           | 0           | 0           | 1           | 0         | 0         | 1         | 1         | 1         |
| 1           | 0           | 0           | 1           | 0         | 0         | 1         | 1         | 1         |
| 2           | 2           | 2           | 2           | 2         | 2         | 2         | 2         | 2         |
| 2           | 2           | 1           | 2           | 2         | 2         | 2         | 2         | 2         |
| 2           | 2           | 2           | 2           | 2         | 2         | 2         | 2         | 2         |
| 2           | 2           | 1           | 2           | 2         | 2         | 2         | 2         | 2         |
| 2           | 2           | 1           | 2           | 2         | 2         | 2         | 2         | 2         |
| 2           | 2           | 1           | 2           | 2         | 2         | 2         | 2         | 2         |
| 2           | 2           | 1           | 2           | 2         | 2         | 2         | 2         | 2         |
| 2           | 2           | 2           | 2           | 2         | 2         | 2         | 2         | 2         |
| 1           | 0           | 1           | 1           | 0         | 0         | 1         | 1         | 1         |
| 2           | 2           | 1           | 2           | 2         | 2         | 1         | 2         | 2         |
| 1           | 0           | 1           | 1           | 0         | 0         | 1         | 1         | 1         |
| 1           | 0           | 1           | 1           | 0         | 0         | 1         | 1         | 1         |
| 1           | 0           | 1           | 1           | 0         | 0         | 1         | 1         | 1         |
| 1           | 0           | 1           | 1           | 0         | 0         | 1         | 1         | 1         |
| 1           | 2           | 2           | 1           | 2         | 2         | 1         | 2         | 2         |
| 2           | 2           | 2           | 2           | 2         | 2         | 2         | 1         | 1         |
| 2           | 2           | 2           | 2           | 2         | 2         | 2         | 1         | 1         |
| 1           | 2           | 2           | 1           | 2         | 2         | 1         | 2         | 2         |
| 1           | 0           | 0           | 1           | 0         | 0         | 1         | 1         | 1         |



|   |   |   |   |   |   |   |   |   |
|---|---|---|---|---|---|---|---|---|
| 2 | 2 | 2 | 2 | 2 | 2 | 2 | 2 | 2 |
| 2 | 2 | 2 | 2 | 2 | 2 | 2 | 2 | 2 |
| 1 | 2 | 2 | 1 | 2 | 2 | 1 | 2 | 2 |
| 2 | 2 | 2 | 2 | 2 | 2 | 2 | 2 | 2 |
| 1 | 0 | 1 | 1 | 0 | 0 | 1 | 1 | 1 |
| 1 | 2 | 2 | 1 | 2 | 2 | 1 | 2 | 2 |
| 2 | 2 | 2 | 2 | 2 | 2 | 2 | 2 | 2 |
| 1 | 0 | 1 | 1 | 0 | 0 | 1 | 1 | 1 |
| 1 | 0 | 0 | 1 | 0 | 0 | 1 | 1 | 1 |
| 2 | 2 | 2 | 2 | 2 | 2 | 2 | 2 | 2 |
| 2 | 2 | 2 | 2 | 2 | 2 | 2 | 2 | 2 |
| 2 | 2 | 2 | 2 | 2 | 2 | 2 | 1 | 1 |
| 1 | 0 | 0 | 1 | 0 | 0 | 1 | 1 | 1 |
| 2 | 2 | 2 | 2 | 2 | 2 | 2 | 2 | 2 |
| 1 | 2 | 2 | 1 | 2 | 2 | 9 | 2 | 2 |
| 2 | 2 | 2 | 2 | 2 | 2 | 2 | 2 | 2 |
| 1 | 0 | 0 | 1 | 0 | 0 | 1 | 1 | 1 |
| 1 | 0 | 0 | 1 | 0 | 0 | 1 | 1 | 1 |
| 2 | 2 | 2 | 2 | 2 | 2 | 2 | 2 | 2 |
| 1 | 0 | 0 | 1 | 0 | 0 | 1 | 1 | 1 |
| 1 | 0 | 0 | 1 | 0 | 0 | 1 | 1 | 1 |
| 2 | 2 | 2 | 2 | 2 | 2 | 2 | 2 | 2 |
| 1 | 2 | 2 | 1 | 2 | 2 | 1 | 1 | 1 |
| 1 | 0 | 0 | 1 | 0 | 0 | 1 | 1 | 1 |
| 2 | 2 | 2 | 2 | 2 | 2 | 2 | 1 | 1 |
| 2 | 2 | 2 | 2 | 2 | 2 | 2 | 2 | 2 |
| 2 | 2 | 2 | 2 | 2 | 2 | 2 | 2 | 2 |
| 2 | 2 | 2 | 2 | 2 | 2 | 2 | 2 | 2 |
| 2 | 2 | 2 | 2 | 2 | 2 | 2 | 2 | 2 |
| 1 | 1 | 1 | 1 | 0 | 0 | 1 | 1 | 1 |
| 1 | 2 | 2 | 1 | 2 | 2 | 9 | 2 | 2 |
| 2 | 2 | 2 | 2 | 2 | 2 | 2 | 2 | 2 |
| 1 | 0 | 0 | 1 | 0 | 0 | 1 | 1 | 1 |
| 1 | 1 | 1 | 1 | 0 | 0 | 1 | 1 | 1 |
| 2 | 2 | 2 | 2 | 2 | 2 | 2 | 2 | 2 |
| 1 | 2 | 2 | 1 | 2 | 2 | 1 | 2 | 2 |
| 2 | 2 | 2 | 2 | 2 | 2 | 2 | 2 | 2 |
| 2 | 2 | 2 | 2 | 2 | 2 | 2 | 2 | 2 |
| 2 | 2 | 2 | 2 | 2 | 2 | 2 | 2 | 2 |
| 2 | 2 | 2 | 2 | 2 | 2 | 2 | 2 | 2 |
| 1 | 2 | 2 | 1 | 2 | 2 | 1 | 1 | 1 |
| 2 | 2 | 2 | 2 | 2 | 2 | 2 | 2 | 2 |
| 1 | 0 | 0 | 1 | 0 | 0 | 1 | 1 | 1 |
| 2 | 2 | 2 | 2 | 2 | 2 | 2 | 2 | 2 |
| 1 | 2 | 2 | 1 | 2 | 2 | 9 | 1 | 1 |
| 1 | 0 | 1 | 1 | 0 | 0 | 1 | 1 | 1 |

|   |   |   |   |   |   |   |   |   |
|---|---|---|---|---|---|---|---|---|
| 2 | 2 | 1 | 2 | 2 | 2 | 2 | 2 | 2 |
| 2 | 2 | 2 | 2 | 2 | 2 | 2 | 2 | 2 |
| 2 | 1 | 2 | 2 | 2 | 2 | 2 | 2 | 2 |
| 2 | 2 | 2 | 2 | 2 | 2 | 2 | 1 | 1 |
| 2 | 2 | 2 | 2 | 2 | 2 | 2 | 2 | 2 |
| 2 | 1 | 2 | 2 | 2 | 2 | 2 | 2 | 2 |
| 1 | 0 | 1 | 1 | 0 | 0 | 1 | 1 | 1 |
| 1 | 0 | 1 | 1 | 0 | 0 | 1 | 1 | 1 |
| 1 | 0 | 1 | 1 | 0 | 0 | 1 | 1 | 1 |
| 2 | 2 | 1 | 2 | 2 | 2 | 2 | 2 | 2 |
| 1 | 0 | 1 | 1 | 0 | 0 | 1 | 1 | 1 |
| 1 | 0 | 1 | 1 | 0 | 0 | 1 | 1 | 1 |
| 1 | 0 | 1 | 1 | 0 | 0 | 1 | 1 | 1 |
| 1 | 2 | 2 | 1 | 2 | 2 | 1 | 1 | 1 |
| 2 | 1 | 1 | 2 | 2 | 2 | 2 | 2 | 2 |
| 2 | 2 | 2 | 2 | 2 | 2 | 2 | 1 | 1 |
| 1 | 1 | 1 | 1 | 0 | 0 | 1 | 0 | 0 |
| 1 | 0 | 1 | 1 | 0 | 0 | 1 | 1 | 1 |
| 2 | 1 | 1 | 2 | 2 | 2 | 2 | 1 | 1 |
| 1 | 2 | 2 | 1 | 2 | 2 | 1 | 2 | 2 |
| 1 | 1 | 1 | 1 | 0 | 0 | 1 | 1 | 1 |
| 1 | 1 | 1 | 1 | 0 | 0 | 1 | 1 | 1 |
| 1 | 1 | 1 | 1 | 0 | 0 | 1 | 1 | 1 |
| 2 | 2 | 2 | 2 | 2 | 2 | 2 | 2 | 2 |
| 1 | 1 | 1 | 1 | 0 | 0 | 1 | 1 | 1 |
| 1 | 1 | 1 | 1 | 0 | 0 | 1 | 1 | 1 |
| 2 | 1 | 2 | 2 | 2 | 2 | 2 | 2 | 2 |
| 1 | 2 | 2 | 1 | 2 | 2 | 1 | 2 | 2 |
| 2 | 2 | 2 | 2 | 2 | 2 | 2 | 2 | 2 |
| 2 | 1 | 2 | 2 | 2 | 2 | 2 | 1 | 1 |
| 1 | 1 | 1 | 1 | 0 | 0 | 1 | 1 | 1 |
| 2 | 2 | 2 | 2 | 2 | 2 | 2 | 2 | 2 |
| 1 | 2 | 2 | 1 | 2 | 2 | 1 | 2 | 2 |
| 1 | 2 | 2 | 1 | 2 | 2 | 1 | 2 | 2 |
| 2 | 2 | 2 | 2 | 2 | 2 | 2 | 2 | 2 |
| 1 | 1 | 0 | 1 | 0 | 0 | 1 | 1 | 1 |
| 2 | 1 | 2 | 2 | 2 | 2 | 2 | 2 | 2 |
| 1 | 2 | 2 | 1 | 2 | 2 | 1 | 2 | 2 |
| 1 | 2 | 2 | 1 | 2 | 2 | 1 | 2 | 2 |
| 2 | 1 | 2 | 2 | 2 | 2 | 2 | 2 | 2 |
| 2 | 1 | 2 | 2 | 2 | 2 | 2 | 1 | 1 |
| 1 | 2 | 2 | 1 | 2 | 2 | 1 | 2 | 2 |
| 1 | 2 | 2 | 1 | 2 | 2 | 1 | 2 | 2 |
| 2 | 2 | 1 | 2 | 2 | 2 | 2 | 2 | 2 |
| 1 | 2 | 2 | 1 | 2 | 2 | 1 | 2 | 2 |
| 1 | 2 | 2 | 1 | 2 | 2 | 1 | 2 | 2 |
| 1 | 2 | 2 | 1 | 2 | 2 | 1 | 2 | 2 |



|   |   |   |   |   |   |   |   |   |
|---|---|---|---|---|---|---|---|---|
| 2 | 2 | 2 | 2 | 2 | 2 | 2 | 2 | 2 |
| 2 | 2 | 2 | 2 | 2 | 2 | 2 | 2 | 2 |
| 2 | 2 | 2 | 2 | 2 | 2 | 2 | 2 | 2 |
| 2 | 2 | 2 | 2 | 2 | 2 | 2 | 2 | 2 |
| 1 | 2 | 1 | 1 | 2 | 2 | 1 | 1 | 2 |
| 1 | 9 | 1 | 1 | 0 | 0 | 1 | 1 | 0 |
| 2 | 2 | 2 | 2 | 2 | 2 | 2 | 2 | 2 |
| 2 | 2 | 2 | 2 | 2 | 2 | 2 | 1 | 2 |
| 2 | 2 | 2 | 2 | 2 | 2 | 2 | 2 | 2 |
| 2 | 2 | 2 | 2 | 2 | 2 | 2 | 2 | 2 |
| 2 | 2 | 2 | 2 | 2 | 2 | 2 | 2 | 2 |
| 1 | 2 | 1 | 1 | 2 | 2 | 1 | 1 | 2 |
| 1 | 1 | 1 | 1 | 0 | 0 | 1 | 1 | 0 |
| 2 | 2 | 2 | 2 | 2 | 2 | 2 | 2 | 2 |
| 2 | 1 | 2 | 2 | 2 | 2 | 2 | 2 | 2 |
| 2 | 2 | 2 | 2 | 2 | 2 | 2 | 2 | 2 |
| 2 | 2 | 2 | 2 | 2 | 2 | 2 | 1 | 2 |
| 1 | 1 | 1 | 1 | 0 | 0 | 1 | 1 | 0 |
| 2 | 2 | 2 | 2 | 2 | 2 | 2 | 2 | 2 |
| 2 | 1 | 2 | 2 | 2 | 2 | 2 | 2 | 2 |
| 2 | 2 | 2 | 2 | 2 | 2 | 2 | 2 | 2 |
| 1 | 2 | 1 | 1 | 2 | 2 | 1 | 2 | 2 |
| 2 | 2 | 2 | 2 | 2 | 2 | 2 | 2 | 2 |
| 1 | 1 | 1 | 1 | 0 | 0 | 1 | 1 | 0 |
| 2 | 2 | 2 | 2 | 2 | 2 | 1 | 2 | 2 |
| 1 | 1 | 1 | 1 | 0 | 0 | 0 | 1 | 0 |
| 2 | 1 | 2 | 2 | 2 | 2 | 2 | 1 | 2 |
| 1 | 1 | 1 | 1 | 0 | 0 | 9 | 1 | 0 |
| 1 | 1 | 1 | 1 | 0 | 0 | 1 | 1 | 0 |
| 1 | 1 | 1 | 1 | 0 | 0 | 1 | 1 | 0 |
| 2 | 2 | 2 | 2 | 2 | 2 | 2 | 2 | 2 |
| 1 | 1 | 0 | 1 | 0 | 0 | 1 | 1 | 0 |
| 1 | 1 | 1 | 1 | 0 | 0 | 1 | 1 | 0 |
| 2 | 2 | 2 | 2 | 2 | 2 | 2 | 2 | 2 |
| 1 | 1 | 1 | 1 | 0 | 0 | 0 | 1 | 0 |
| 2 | 2 | 2 | 2 | 2 | 2 | 2 | 2 | 2 |
| 2 | 2 | 1 | 2 | 2 | 2 | 1 | 2 | 2 |
| 2 | 2 | 2 | 2 | 2 | 2 | 2 | 2 | 2 |
| 1 | 1 | 1 | 1 | 0 | 0 | 0 | 1 | 0 |
| 2 | 2 | 2 | 2 | 2 | 2 | 2 | 2 | 2 |
| 2 | 2 | 1 | 2 | 2 | 2 | 2 | 2 | 2 |
| 2 | 1 | 2 | 2 | 2 | 2 | 2 | 1 | 2 |
| 1 | 1 | 1 | 1 | 0 | 0 | 1 | 1 | 0 |
| 1 | 1 | 2 | 1 | 2 | 2 | 2 | 1 | 2 |
| 1 | 1 | 1 | 1 | 0 | 0 | 0 | 1 | 0 |
| 1 | 1 | 1 | 1 | 0 | 0 | 0 | 1 | 0 |
| 1 | 2 | 2 | 1 | 2 | 2 | 2 | 2 | 2 |



|   |   |   |   |   |   |   |   |   |
|---|---|---|---|---|---|---|---|---|
| 2 | 2 | 2 | 2 | 2 | 2 | 2 | 2 | 2 |
| 1 | 1 | 1 | 1 | 0 | 0 | 0 | 1 | 0 |
| 2 | 2 | 2 | 2 | 2 | 2 | 2 | 2 | 2 |
| 1 | 1 | 1 | 1 | 0 | 0 | 0 | 1 | 0 |
| 1 | 1 | 1 | 1 | 0 | 0 | 0 | 1 | 0 |
| 1 | 1 | 2 | 1 | 2 | 2 | 2 | 1 | 2 |
| 2 | 2 | 2 | 2 | 2 | 2 | 2 | 1 | 2 |
| 2 | 2 | 1 | 2 | 2 | 2 | 2 | 2 | 2 |
| 1 | 2 | 2 | 1 | 2 | 2 | 1 | 2 | 2 |
| 1 | 2 | 2 | 1 | 2 | 2 | 1 | 2 | 2 |
| 1 | 2 | 2 | 1 | 2 | 2 | 1 | 2 | 2 |
| 2 | 2 | 2 | 2 | 2 | 2 | 1 | 2 | 2 |
| 1 | 2 | 2 | 1 | 2 | 2 | 1 | 2 | 2 |
| 1 | 2 | 2 | 1 | 2 | 2 | 1 | 2 | 2 |
| 1 | 1 | 0 | 1 | 0 | 0 | 1 | 1 | 0 |
| 2 | 2 | 2 | 2 | 2 | 2 | 1 | 2 | 2 |
| 1 | 1 | 0 | 1 | 0 | 0 | 1 | 1 | 0 |
| 2 | 2 | 1 | 2 | 2 | 2 | 2 | 2 | 2 |
| 1 | 2 | 2 | 1 | 2 | 2 | 1 | 2 | 2 |
| 1 | 1 | 2 | 1 | 2 | 2 | 2 | 1 | 2 |
| 1 | 1 | 0 | 1 | 0 | 0 | 1 | 1 | 0 |
| 1 | 2 | 2 | 1 | 2 | 2 | 2 | 2 | 2 |
| 2 | 2 | 2 | 2 | 2 | 2 | 1 | 2 | 2 |
| 1 | 1 | 2 | 1 | 2 | 2 | 2 | 1 | 2 |
| 2 | 2 | 2 | 2 | 2 | 2 | 2 | 2 | 2 |
| 2 | 2 | 2 | 2 | 2 | 2 | 1 | 2 | 2 |
| 1 | 1 | 0 | 1 | 0 | 0 | 1 | 1 | 0 |
| 2 | 2 | 2 | 2 | 2 | 2 | 1 | 2 | 2 |
| 2 | 2 | 2 | 2 | 2 | 2 | 1 | 2 | 2 |
| 2 | 2 | 2 | 2 | 2 | 2 | 1 | 2 | 2 |
| 1 | 1 | 2 | 1 | 2 | 2 | 2 | 1 | 2 |
| 2 | 2 | 2 | 2 | 2 | 2 | 1 | 2 | 2 |
| 1 | 1 | 2 | 1 | 2 | 2 | 2 | 2 | 2 |
| 1 | 1 | 0 | 1 | 0 | 0 | 1 | 1 | 0 |
| 1 | 1 | 0 | 1 | 0 | 0 | 1 | 1 | 0 |
| 1 | 1 | 2 | 1 | 2 | 2 | 2 | 1 | 2 |
| 2 | 2 | 2 | 2 | 2 | 2 | 1 | 2 | 2 |
| 2 | 1 | 2 | 2 | 2 | 2 | 2 | 1 | 2 |
| 2 | 2 | 2 | 2 | 2 | 2 | 2 | 1 | 2 |
| 1 | 1 | 1 | 1 | 0 | 0 | 1 | 1 | 0 |
| 2 | 1 | 2 | 2 | 2 | 2 | 2 | 1 | 2 |
| 2 | 2 | 2 | 2 | 2 | 2 | 2 | 1 | 2 |
| 1 | 2 | 2 | 1 | 2 | 2 | 1 | 2 | 2 |
| 1 | 2 | 2 | 1 | 2 | 2 | 2 | 2 | 2 |
| 2 | 2 | 2 | 2 | 2 | 2 | 1 | 2 | 2 |



|   |   |   |   |   |   |   |   |   |
|---|---|---|---|---|---|---|---|---|
| 2 | 2 | 2 | 2 | 2 | 2 | 2 | 2 | 2 |
| 2 | 2 | 2 | 2 | 2 | 2 | 2 | 2 | 2 |
| 2 | 1 | 2 | 2 | 2 | 2 | 2 | 2 | 2 |
| 2 | 2 | 2 | 2 | 2 | 2 | 2 | 2 | 2 |
| 2 | 2 | 2 | 2 | 2 | 2 | 2 | 2 | 2 |
| 1 | 1 | 1 | 1 | 0 | 0 | 1 | 1 | 0 |
| 2 | 2 | 2 | 2 | 2 | 2 | 2 | 2 | 2 |
| 1 | 2 | 2 | 1 | 2 | 2 | 2 | 1 | 2 |
| 1 | 0 | 0 | 1 | 0 | 0 | 9 | 1 | 0 |
| 2 | 2 | 2 | 2 | 2 | 2 | 2 | 2 | 2 |
| 2 | 2 | 2 | 2 | 2 | 2 | 2 | 2 | 2 |
| 2 | 2 | 2 | 2 | 2 | 2 | 2 | 2 | 2 |
| 2 | 2 | 1 | 2 | 2 | 2 | 2 | 2 | 2 |
| 2 | 2 | 2 | 2 | 2 | 2 | 2 | 2 | 2 |
| 2 | 2 | 2 | 2 | 2 | 2 | 2 | 2 | 2 |
| 1 | 1 | 1 | 1 | 0 | 0 | 1 | 1 | 0 |
| 1 | 1 | 1 | 1 | 0 | 0 | 1 | 1 | 0 |
| 2 | 2 | 2 | 2 | 2 | 2 | 2 | 2 | 2 |
| 2 | 2 | 2 | 2 | 2 | 2 | 2 | 2 | 2 |
| 1 | 1 | 1 | 1 | 0 | 0 | 1 | 1 | 0 |
| 1 | 1 | 1 | 1 | 0 | 0 | 1 | 1 | 0 |
| 2 | 2 | 2 | 2 | 2 | 2 | 2 | 2 | 2 |
| 2 | 2 | 2 | 2 | 2 | 2 | 9 | 2 | 2 |
| 1 | 1 | 1 | 1 | 0 | 0 | 1 | 1 | 0 |
| 1 | 1 | 1 | 1 | 0 | 0 | 1 | 1 | 0 |
| 1 | 0 | 1 | 1 | 0 | 0 | 0 | 1 | 0 |
| 2 | 2 | 2 | 2 | 2 | 2 | 2 | 2 | 2 |
| 2 | 2 | 2 | 9 | 2 | 2 | 2 | 2 | 2 |
| 2 | 2 | 2 | 2 | 2 | 2 | 2 | 2 | 2 |
| 1 | 1 | 0 | 1 | 0 | 0 | 1 | 1 | 0 |
| 2 | 2 | 2 | 1 | 2 | 2 | 2 | 2 | 2 |
| 1 | 1 | 1 | 1 | 0 | 0 | 1 | 1 | 0 |
| 2 | 2 | 2 | 2 | 2 | 2 | 2 | 2 | 2 |
| 2 | 2 | 2 | 2 | 2 | 2 | 2 | 2 | 2 |
| 2 | 1 | 2 | 2 | 2 | 2 | 2 | 1 | 2 |
| 1 | 1 | 1 | 1 | 0 | 0 | 1 | 1 | 0 |
| 2 | 2 | 2 | 2 | 2 | 2 | 2 | 2 | 2 |
| 2 | 2 | 2 | 2 | 2 | 2 | 2 | 2 | 2 |
| 1 | 1 | 1 | 1 | 0 | 0 | 1 | 1 | 0 |
| 1 | 1 | 1 | 1 | 0 | 0 | 1 | 1 | 0 |
| 1 | 2 | 2 | 1 | 2 | 2 | 1 | 2 | 2 |
| 2 | 2 | 1 | 2 | 2 | 2 | 2 | 2 | 2 |
| 2 | 2 | 2 | 2 | 2 | 2 | 2 | 2 | 2 |
| 2 | 1 | 2 | 2 | 2 | 2 | 2 | 1 | 2 |
| 2 | 2 | 1 | 2 | 2 | 2 | 2 | 2 | 2 |
| 1 | 1 | 1 | 1 | 0 | 0 | 1 | 1 | 0 |
| 1 | 1 | 0 | 1 | 0 | 0 | 1 | 1 | 0 |



















































|   |   |   |   |   |   |   |   |   |
|---|---|---|---|---|---|---|---|---|
| 0 | 0 | 1 | 0 | 0 | 1 | 0 | 1 | 0 |
| 0 | 0 | 1 | 0 | 0 | 1 | 0 | 1 | 0 |
| 0 | 0 | 1 | 0 | 0 | 0 | 0 | 1 | 0 |
| 2 | 2 | 2 | 2 | 2 | 2 | 2 | 2 | 2 |
| 2 | 2 | 2 | 2 | 2 | 2 | 2 | 1 | 2 |
| 2 | 2 | 2 | 2 | 2 | 2 | 2 | 2 | 2 |
| 2 | 2 | 2 | 2 | 2 | 2 | 2 | 2 | 2 |
| 0 | 0 | 1 | 0 | 0 | 1 | 0 | 0 | 0 |
| 2 | 2 | 2 | 2 | 2 | 2 | 2 | 1 | 2 |
| 0 | 0 | 1 | 0 | 0 | 1 | 0 | 1 | 0 |
| 0 | 0 | 1 | 0 | 0 | 1 | 0 | 1 | 0 |
| 1 | 1 | 1 | 0 | 0 | 1 | 0 | 0 | 0 |
| 1 | 1 | 1 | 2 | 2 | 1 | 2 | 2 | 2 |
| 1 | 1 | 1 | 0 | 0 | 1 | 0 | 1 | 0 |
| 2 | 2 | 2 | 2 | 2 | 2 | 2 | 2 | 1 |
| 1 | 1 | 1 | 0 | 0 | 1 | 0 | 1 | 0 |
| 2 | 2 | 2 | 2 | 2 | 2 | 2 | 2 | 1 |
| 2 | 2 | 2 | 2 | 2 | 1 | 2 | 1 | 2 |
| 1 | 1 | 1 | 2 | 2 | 2 | 2 | 2 | 2 |
| 2 | 2 | 2 | 2 | 2 | 1 | 2 | 1 | 2 |
| 2 | 2 | 2 | 2 | 2 | 1 | 2 | 1 | 2 |
| 1 | 1 | 1 | 0 | 0 | 1 | 0 | 1 | 0 |
| 2 | 2 | 2 | 2 | 2 | 1 | 2 | 1 | 2 |
| 1 | 1 | 1 | 2 | 2 | 2 | 2 | 2 | 2 |
| 2 | 2 | 2 | 2 | 2 | 1 | 9 | 1 | 2 |
| 2 | 2 | 1 | 2 | 2 | 2 | 2 | 2 | 2 |
| 2 | 2 | 2 | 2 | 2 | 2 | 2 | 1 | 2 |
| 2 | 2 | 2 | 2 | 2 | 1 | 2 | 1 | 2 |
| 1 | 1 | 1 | 0 | 0 | 0 | 0 | 0 | 1 |
| 1 | 1 | 1 | 0 | 0 | 0 | 0 | 0 | 1 |
| 1 | 1 | 1 | 0 | 0 | 0 | 0 | 0 | 1 |
| 2 | 2 | 2 | 2 | 2 | 1 | 2 | 1 | 2 |
| 1 | 1 | 1 | 0 | 0 | 1 | 0 | 1 | 1 |
| 1 | 1 | 1 | 0 | 0 | 1 | 0 | 1 | 1 |
| 1 | 1 | 1 | 0 | 0 | 0 | 0 | 0 | 1 |
| 1 | 1 | 1 | 0 | 0 | 0 | 0 | 0 | 1 |
| 1 | 1 | 1 | 0 | 0 | 0 | 0 | 0 | 1 |
| 2 | 2 | 1 | 2 | 2 | 2 | 2 | 2 | 2 |
| 2 | 2 | 2 | 2 | 2 | 1 | 2 | 2 | 2 |
| 2 | 2 | 2 | 2 | 2 | 2 | 2 | 2 | 2 |
| 1 | 1 | 1 | 0 | 0 | 1 | 0 | 0 | 1 |
| 2 | 2 | 2 | 2 | 2 | 2 | 2 | 2 | 1 |
| 1 | 1 | 1 | 0 | 0 | 1 | 0 | 0 | 1 |
| 1 | 1 | 1 | 0 | 0 | 1 | 0 | 0 | 1 |
| 1 | 1 | 1 | 0 | 0 | 1 | 0 | 0 | 1 |
| 1 | 1 | 1 | 0 | 0 | 1 | 0 | 1 | 0 |
| 1 | 1 | 1 | 2 | 2 | 2 | 2 | 2 | 2 |



|   |   |   |   |   |   |   |   |   |   |
|---|---|---|---|---|---|---|---|---|---|
| 2 | 2 | 2 | 2 | 2 | 2 | 2 | 2 | 2 | 2 |
| 2 | 2 | 2 | 2 | 2 | 2 | 2 | 2 | 2 | 2 |
| 0 | 0 | 1 | 0 | 0 | 0 | 0 | 0 | 0 | 2 |
| 1 | 1 | 2 | 2 | 2 | 2 | 2 | 1 | 2 | 2 |
| 2 | 2 | 2 | 2 | 2 | 2 | 2 | 2 | 1 | 2 |
| 2 | 2 | 2 | 2 | 2 | 2 | 2 | 2 | 2 | 2 |
| 1 | 1 | 1 | 2 | 2 | 1 | 2 | 1 | 2 | 2 |
| 1 | 1 | 1 | 2 | 2 | 1 | 2 | 1 | 2 | 2 |
| 2 | 2 | 2 | 2 | 2 | 2 | 2 | 2 | 1 | 2 |
| 1 | 1 | 1 | 2 | 1 | 1 | 0 | 0 | 1 | 1 |
| 1 | 1 | 0 | 2 | 1 | 0 | 0 | 0 | 1 | 1 |
| 1 | 1 | 0 | 2 | 1 | 0 | 0 | 0 | 1 | 1 |
| 1 | 1 | 2 | 0 | 1 | 2 | 2 | 2 | 1 | 1 |
| 2 | 2 | 2 | 2 | 2 | 2 | 2 | 2 | 2 | 2 |
| 2 | 2 | 2 | 2 | 2 | 2 | 2 | 2 | 2 | 2 |
| 2 | 2 | 2 | 2 | 2 | 2 | 2 | 1 | 2 | 2 |
| 2 | 2 | 1 | 2 | 2 | 1 | 2 | 2 | 2 | 2 |
| 1 | 1 | 2 | 1 | 1 | 2 | 2 | 2 | 2 | 2 |
| 2 | 2 | 2 | 1 | 2 | 2 | 2 | 2 | 1 | 2 |
| 2 | 2 | 2 | 2 | 2 | 2 | 2 | 2 | 1 | 2 |
| 2 | 2 | 2 | 1 | 2 | 2 | 2 | 2 | 1 | 2 |
| 2 | 2 | 2 | 2 | 2 | 2 | 2 | 2 | 2 | 2 |
| 1 | 1 | 2 | 0 | 1 | 2 | 2 | 2 | 1 | 2 |
| 2 | 2 | 1 | 2 | 2 | 1 | 2 | 2 | 2 | 2 |
| 2 | 2 | 2 | 1 | 2 | 2 | 2 | 2 | 1 | 2 |
| 2 | 2 | 2 | 2 | 2 | 2 | 2 | 2 | 2 | 2 |
| 1 | 1 | 1 | 2 | 1 | 1 | 0 | 1 | 1 | 1 |
| 1 | 1 | 1 | 2 | 1 | 1 | 0 | 0 | 1 | 1 |
| 2 | 2 | 2 | 2 | 2 | 2 | 2 | 2 | 2 | 2 |
| 1 | 1 | 1 | 2 | 1 | 1 | 0 | 0 | 1 | 1 |
| 2 | 2 | 2 | 2 | 2 | 2 | 2 | 2 | 2 | 2 |
| 1 | 1 | 1 | 2 | 1 | 1 | 0 | 0 | 1 | 1 |
| 2 | 2 | 2 | 2 | 2 | 2 | 2 | 1 | 2 | 2 |
| 1 | 1 | 2 | 1 | 1 | 2 | 2 | 2 | 2 | 2 |
| 2 | 2 | 2 | 2 | 2 | 2 | 2 | 2 | 2 | 2 |
| 1 | 1 | 1 | 2 | 1 | 1 | 0 | 0 | 1 | 1 |
| 2 | 2 | 2 | 2 | 2 | 2 | 2 | 2 | 2 | 2 |
| 2 | 2 | 2 | 2 | 2 | 2 | 2 | 2 | 2 | 2 |
| 1 | 1 | 2 | 0 | 1 | 2 | 2 | 2 | 1 | 2 |
| 1 | 1 | 1 | 2 | 1 | 1 | 0 | 0 | 1 | 1 |
| 2 | 2 | 2 | 2 | 2 | 2 | 2 | 2 | 2 | 2 |
| 2 | 2 | 2 | 2 | 2 | 2 | 2 | 1 | 2 | 2 |
| 2 | 2 | 2 | 2 | 2 | 2 | 2 | 1 | 2 | 2 |
| 2 | 2 | 2 | 2 | 2 | 2 | 2 | 1 | 2 | 2 |
| 2 | 2 | 1 | 2 | 2 | 1 | 2 | 1 | 2 | 2 |
| 2 | 2 | 2 | 2 | 2 | 2 | 2 | 2 | 2 | 2 |
| 1 | 1 | 1 | 1 | 1 | 1 | 0 | 1 | 0 | 0 |

|   |   |   |   |   |   |   |   |   |
|---|---|---|---|---|---|---|---|---|
| 2 | 2 | 2 | 2 | 2 | 2 | 2 | 2 | 2 |
| 1 | 1 | 0 | 2 | 1 | 0 | 0 | 0 | 1 |
| 1 | 1 | 1 | 2 | 1 | 1 | 0 | 0 | 1 |
| 1 | 1 | 2 | 1 | 1 | 2 | 2 | 2 | 2 |
| 1 | 1 | 0 | 2 | 1 | 0 | 0 | 0 | 1 |
| 2 | 2 | 1 | 2 | 2 | 1 | 2 | 2 | 2 |
| 2 | 2 | 1 | 2 | 2 | 1 | 2 | 2 | 2 |
| 2 | 2 | 2 | 2 | 2 | 2 | 2 | 2 | 2 |
| 1 | 1 | 2 | 0 | 1 | 1 | 2 | 2 | 1 |
| 2 | 2 | 2 | 2 | 2 | 2 | 2 | 2 | 2 |
| 2 | 2 | 0 | 1 | 2 | 1 | 2 | 1 | 2 |
| 2 | 2 | 2 | 2 | 2 | 2 | 2 | 2 | 2 |
| 2 | 2 | 1 | 2 | 1 | 2 | 2 | 2 | 2 |
| 1 | 1 | 1 | 2 | 1 | 1 | 0 | 1 | 1 |
| 1 | 1 | 0 | 2 | 0 | 1 | 0 | 1 | 1 |
| 1 | 1 | 1 | 2 | 1 | 1 | 0 | 1 | 1 |
| 2 | 2 | 1 | 2 | 2 | 2 | 2 | 2 | 2 |
| 2 | 2 | 2 | 2 | 2 | 2 | 2 | 2 | 2 |
| 2 | 2 | 2 | 2 | 2 | 2 | 2 | 2 | 2 |
| 1 | 1 | 0 | 2 | 1 | 1 | 0 | 1 | 1 |
| 2 | 2 | 2 | 2 | 2 | 2 | 2 | 2 | 2 |
| 2 | 2 | 2 | 2 | 2 | 2 | 2 | 2 | 2 |
| 1 | 1 | 1 | 2 | 1 | 1 | 0 | 1 | 1 |
| 2 | 2 | 1 | 2 | 2 | 2 | 2 | 2 | 2 |
| 2 | 2 | 1 | 2 | 1 | 2 | 2 | 2 | 2 |
| 2 | 2 | 2 | 2 | 2 | 2 | 2 | 2 | 1 |
| 2 | 2 | 2 | 2 | 2 | 2 | 2 | 2 | 1 |
| 2 | 2 | 2 | 2 | 2 | 2 | 2 | 2 | 2 |
| 2 | 2 | 2 | 2 | 2 | 2 | 2 | 2 | 2 |
| 1 | 1 | 1 | 2 | 1 | 1 | 0 | 1 | 1 |
| 1 | 1 | 1 | 2 | 1 | 1 | 0 | 1 | 0 |
| 2 | 2 | 2 | 2 | 2 | 2 | 2 | 2 | 2 |
| 2 | 2 | 2 | 2 | 2 | 2 | 2 | 2 | 2 |
| 2 | 2 | 2 | 2 | 2 | 2 | 2 | 2 | 1 |
| 1 | 1 | 1 | 2 | 1 | 1 | 0 | 1 | 0 |
| 2 | 2 | 2 | 2 | 2 | 2 | 2 | 2 | 1 |
| 2 | 2 | 2 | 2 | 2 | 2 | 2 | 2 | 1 |
| 1 | 1 | 1 | 2 | 1 | 1 | 0 | 1 | 0 |
| 2 | 2 | 2 | 2 | 2 | 2 | 2 | 2 | 2 |
| 2 | 2 | 2 | 2 | 2 | 2 | 2 | 2 | 2 |
| 2 | 2 | 2 | 2 | 1 | 2 | 2 | 1 | 2 |
| 2 | 2 | 2 | 2 | 2 | 2 | 2 | 2 | 1 |
| 1 | 1 | 1 | 2 | 1 | 1 | 0 | 1 | 0 |
| 2 | 2 | 2 | 2 | 2 | 2 | 2 | 2 | 2 |
| 1 | 1 | 1 | 2 | 1 | 1 | 0 | 1 | 0 |
| 2 | 2 | 2 | 2 | 1 | 2 | 2 | 1 | 2 |

|   |   |   |   |   |   |   |   |   |
|---|---|---|---|---|---|---|---|---|
| 2 | 2 | 2 | 2 | 1 | 2 | 2 | 2 | 2 |
| 1 | 1 | 1 | 2 | 1 | 1 | 0 | 1 | 0 |
| 1 | 1 | 1 | 2 | 1 | 1 | 0 | 1 | 0 |
| 1 | 1 | 1 | 2 | 1 | 1 | 0 | 1 | 0 |
| 1 | 1 | 1 | 2 | 1 | 1 | 0 | 1 | 0 |
| 1 | 1 | 2 | 0 | 2 | 1 | 2 | 2 | 2 |
| 1 | 1 | 1 | 2 | 1 | 1 | 0 | 1 | 0 |
| 1 | 1 | 1 | 2 | 1 | 1 | 0 | 1 | 0 |
| 1 | 1 | 1 | 2 | 1 | 1 | 0 | 1 | 1 |
| 2 | 2 | 2 | 2 | 2 | 2 | 2 | 2 | 2 |
| 2 | 2 | 2 | 2 | 2 | 2 | 2 | 2 | 2 |
| 1 | 1 | 2 | 0 | 2 | 2 | 2 | 2 | 2 |
| 2 | 2 | 1 | 2 | 2 | 2 | 2 | 1 | 2 |
| 2 | 2 | 1 | 2 | 2 | 2 | 2 | 1 | 2 |
| 2 | 2 | 2 | 2 | 2 | 2 | 2 | 2 | 2 |
| 2 | 9 | 1 | 2 | 2 | 1 | 2 | 1 | 1 |
| 2 | 2 | 2 | 2 | 2 | 1 | 2 | 2 | 1 |
| 2 | 2 | 2 | 2 | 2 | 2 | 2 | 2 | 2 |
| 2 | 2 | 2 | 2 | 2 | 1 | 2 | 1 | 1 |
| 2 | 2 | 2 | 2 | 2 | 1 | 2 | 2 | 1 |
| 2 | 2 | 1 | 2 | 2 | 1 | 2 | 1 | 1 |
| 0 | 0 | 1 | 0 | 1 | 1 | 0 | 1 | 1 |
| 2 | 2 | 1 | 2 | 2 | 2 | 2 | 1 | 1 |
| 2 | 2 | 1 | 2 | 2 | 1 | 2 | 1 | 1 |
| 2 | 2 | 1 | 2 | 2 | 2 | 2 | 1 | 1 |
| 2 | 2 | 1 | 2 | 2 | 1 | 2 | 1 | 1 |
| 2 | 2 | 2 | 2 | 2 | 2 | 2 | 2 | 1 |
| 2 | 2 | 2 | 2 | 2 | 2 | 2 | 1 | 1 |
| 2 | 2 | 2 | 2 | 2 | 2 | 2 | 1 | 1 |
| 2 | 2 | 1 | 2 | 2 | 2 | 2 | 1 | 1 |
| 2 | 2 | 1 | 2 | 1 | 2 | 2 | 2 | 1 |
| 0 | 0 | 1 | 0 | 1 | 1 | 0 | 1 | 1 |
| 2 | 2 | 1 | 2 | 1 | 1 | 2 | 1 | 2 |
| 0 | 0 | 1 | 0 | 1 | 0 | 0 | 1 | 1 |
| 2 | 2 | 1 | 2 | 1 | 2 | 2 | 1 | 2 |
| 2 | 2 | 1 | 2 | 2 | 2 | 2 | 2 | 1 |
| 2 | 2 | 1 | 2 | 1 | 2 | 2 | 1 | 2 |
| 2 | 2 | 2 | 2 | 1 | 2 | 2 | 1 | 2 |
| 2 | 2 | 2 | 2 | 2 | 1 | 2 | 2 | 1 |
| 2 | 2 | 1 | 2 | 2 | 2 | 2 | 2 | 2 |
| 2 | 2 | 2 | 2 | 1 | 2 | 2 | 2 | 2 |
| 2 | 2 | 1 | 2 | 2 | 2 | 2 | 2 | 2 |
| 2 | 2 | 2 | 2 | 1 | 1 | 2 | 2 | 1 |
| 2 | 2 | 2 | 2 | 2 | 1 | 2 | 2 | 1 |
| 2 | 2 | 2 | 2 | 2 | 1 | 2 | 2 | 1 |



| RAWGS1006 | RAWGS1150 | RAWGS1242 | RAWGS1267 |
|-----------|-----------|-----------|-----------|
| 0         | 0         | 0         | 0         |
| 0         | 0         | 0         | 0         |
| 2         | 2         | 2         | 2         |
| 2         | 2         | 2         | 2         |
| 0         | 0         | 0         | 0         |
| 2         | 2         | 2         | 2         |
| 2         | 2         | 2         | 2         |
| 0         | 0         | 0         | 0         |
| 2         | 2         | 2         | 2         |
| 2         | 2         | 2         | 2         |
| 0         | 0         | 0         | 0         |
| 0         | 0         | 0         | 0         |
| 0         | 0         | 0         | 0         |
| 0         | 0         | 0         | 0         |
| 2         | 2         | 2         | 2         |
| 2         | 2         | 2         | 2         |
| 0         | 0         | 0         | 0         |
| 0         | 0         | 0         | 0         |
| 0         | 0         | 0         | 0         |
| 0         | 0         | 0         | 0         |
| 0         | 0         | 0         | 0         |
| 0         | 0         | 0         | 0         |
| 2         | 2         | 2         | 2         |
| 2         | 2         | 2         | 2         |
| 2         | 2         | 2         | 2         |
| 2         | 2         | 2         | 2         |
| 2         | 2         | 2         | 2         |
| 2         | 2         | 2         | 2         |
| 2         | 2         | 2         | 2         |
| 2         | 2         | 2         | 2         |
| 0         | 0         | 0         | 0         |
| 2         | 2         | 2         | 2         |
| 0         | 0         | 0         | 0         |
| 0         | 0         | 0         | 0         |
| 0         | 0         | 0         | 0         |
| 0         | 0         | 0         | 0         |
| 2         | 2         | 2         | 2         |
| 2         | 2         | 2         | 2         |
| 2         | 2         | 2         | 2         |
| 2         | 2         | 2         | 2         |
| 0         | 0         | 0         | 0         |





|   |   |   |   |
|---|---|---|---|
| 2 | 2 | 2 | 2 |
| 2 | 2 | 2 | 2 |
| 2 | 2 | 2 | 2 |
| 2 | 2 | 2 | 2 |
| 0 | 0 | 0 | 0 |
| 2 | 2 | 2 | 2 |
| 2 | 2 | 2 | 2 |
| 0 | 0 | 0 | 0 |
| 0 | 0 | 0 | 0 |
| 2 | 2 | 2 | 2 |
| 2 | 2 | 2 | 2 |
| 2 | 2 | 2 | 2 |
| 0 | 0 | 0 | 0 |
| 2 | 2 | 2 | 2 |
| 2 | 2 | 2 | 2 |
| 2 | 2 | 2 | 2 |
| 0 | 0 | 0 | 0 |
| 0 | 0 | 0 | 0 |
| 2 | 2 | 2 | 2 |
| 0 | 0 | 0 | 0 |
| 0 | 0 | 0 | 0 |
| 2 | 2 | 2 | 2 |
| 2 | 2 | 2 | 2 |
| 0 | 0 | 0 | 0 |
| 2 | 2 | 2 | 2 |
| 2 | 2 | 2 | 2 |
| 2 | 2 | 2 | 2 |
| 2 | 2 | 2 | 2 |
| 2 | 2 | 2 | 2 |
| 2 | 2 | 2 | 2 |
| 2 | 2 | 2 | 2 |
| 2 | 2 | 2 | 2 |
| 1 | 0 | 0 | 0 |
| 2 | 2 | 2 | 2 |
| 2 | 2 | 2 | 2 |
| 0 | 0 | 0 | 0 |
| 1 | 0 | 0 | 0 |
| 2 | 2 | 2 | 2 |
| 2 | 2 | 2 | 2 |
| 2 | 2 | 2 | 2 |
| 2 | 2 | 2 | 2 |
| 2 | 2 | 2 | 2 |
| 2 | 2 | 2 | 2 |
| 2 | 2 | 2 | 2 |
| 2 | 2 | 2 | 2 |
| 2 | 2 | 2 | 2 |
| 2 | 2 | 2 | 2 |
| 0 | 0 | 0 | 0 |
| 2 | 2 | 2 | 2 |
| 2 | 2 | 2 | 2 |
| 0 | 0 | 0 | 0 |



|   |   |   |   |
|---|---|---|---|
| 2 | 2 | 2 | 2 |
| 2 | 2 | 2 | 2 |
| 1 | 2 | 2 | 2 |
| 2 | 2 | 2 | 2 |
| 2 | 2 | 2 | 2 |
| 1 | 2 | 2 | 2 |
| 2 | 2 | 2 | 2 |
| 2 | 2 | 2 | 2 |
| 2 | 2 | 2 | 2 |
| 2 | 2 | 9 | 2 |
| 2 | 2 | 2 | 2 |
| 1 | 0 | 0 | 0 |
| 2 | 2 | 2 | 2 |
| 0 | 0 | 0 | 0 |
| 2 | 2 | 2 | 2 |
| 1 | 2 | 2 | 2 |
| 1 | 1 | 9 | 1 |
| 2 | 2 | 2 | 2 |
| 2 | 2 | 2 | 2 |
| 2 | 2 | 2 | 2 |
| 2 | 2 | 2 | 2 |
| 1 | 0 | 0 | 0 |
| 2 | 2 | 2 | 2 |
| 2 | 2 | 2 | 2 |
| 1 | 0 | 0 | 0 |
| 1 | 0 | 0 | 0 |
| 1 | 0 | 0 | 0 |
| 2 | 2 | 2 | 2 |
| 1 | 0 | 9 | 0 |
| 2 | 2 | 2 | 2 |
| 2 | 2 | 2 | 2 |
| 1 | 0 | 0 | 0 |
| 1 | 0 | 0 | 0 |
| 2 | 2 | 2 | 2 |
| 1 | 0 | 0 | 0 |
| 2 | 2 | 2 | 2 |
| 2 | 2 | 2 | 2 |
| 2 | 2 | 2 | 2 |
| 2 | 2 | 2 | 2 |
| 1 | 0 | 0 | 0 |
| 1 | 0 | 0 | 0 |
| 2 | 2 | 2 | 2 |
| 2 | 2 | 2 | 2 |
| 2 | 2 | 2 | 2 |
| 2 | 2 | 2 | 2 |

|   |   |   |   |
|---|---|---|---|
| 2 | 2 | 2 | 2 |
| 2 | 2 | 2 | 2 |
| 2 | 2 | 2 | 2 |
| 2 | 2 | 2 | 2 |
| 2 | 2 | 2 | 2 |
| 1 | 0 | 0 | 0 |
| 2 | 2 | 2 | 2 |
| 2 | 2 | 2 | 2 |
| 2 | 2 | 2 | 2 |
| 2 | 2 | 2 | 2 |
| 2 | 2 | 2 | 2 |
| 2 | 2 | 2 | 2 |
| 1 | 0 | 0 | 0 |
| 2 | 2 | 2 | 2 |
| 1 | 2 | 2 | 2 |
| 2 | 2 | 2 | 2 |
| 2 | 2 | 2 | 2 |
| 1 | 0 | 0 | 0 |
| 2 | 2 | 2 | 2 |
| 1 | 2 | 2 | 2 |
| 2 | 2 | 2 | 2 |
| 2 | 2 | 2 | 2 |
| 2 | 2 | 2 | 2 |
| 1 | 0 | 0 | 0 |
| 2 | 2 | 2 | 2 |
| 1 | 0 | 0 | 0 |
| 1 | 2 | 2 | 2 |
| 1 | 0 | 0 | 0 |
| 1 | 0 | 0 | 0 |
| 2 | 2 | 2 | 2 |
| 1 | 0 | 0 | 0 |
| 1 | 0 | 0 | 0 |
| 2 | 2 | 2 | 2 |
| 2 | 2 | 2 | 2 |
| 2 | 2 | 2 | 2 |
| 1 | 0 | 0 | 0 |
| 2 | 2 | 2 | 2 |
| 2 | 2 | 2 | 2 |
| 1 | 2 | 2 | 2 |
| 1 | 2 | 2 | 2 |
| 1 | 0 | 0 | 0 |
| 1 | 2 | 2 | 2 |
| 1 | 0 | 0 | 0 |
| 1 | 0 | 0 | 0 |
| 2 | 2 | 2 | 2 |

|   |   |   |   |
|---|---|---|---|
| 2 | 2 | 2 | 2 |
| 1 | 0 | 0 | 0 |
| 2 | 2 | 2 | 2 |
| 1 | 0 | 0 | 0 |
| 1 | 0 | 0 | 0 |
| 1 | 2 | 2 | 2 |
| 2 | 2 | 2 | 2 |
| 2 | 2 | 2 | 2 |
| 2 | 2 | 2 | 2 |
| 2 | 2 | 2 | 2 |
| 2 | 2 | 2 | 2 |
| 2 | 2 | 2 | 2 |
| 2 | 2 | 2 | 2 |
| 1 | 0 | 0 | 0 |
| 2 | 2 | 2 | 2 |
| 1 | 0 | 0 | 0 |
| 2 | 2 | 2 | 2 |
| 2 | 2 | 2 | 2 |
| 1 | 2 | 2 | 2 |
| 1 | 0 | 0 | 0 |
| 2 | 2 | 2 | 2 |
| 2 | 2 | 2 | 2 |
| 1 | 2 | 2 | 2 |
| 2 | 2 | 2 | 2 |
| 2 | 2 | 2 | 2 |
| 1 | 0 | 0 | 0 |
| 2 | 2 | 2 | 2 |
| 2 | 2 | 2 | 2 |
| 2 | 2 | 2 | 2 |
| 1 | 2 | 2 | 2 |
| 2 | 2 | 2 | 2 |
| 1 | 0 | 0 | 0 |
| 1 | 2 | 2 | 2 |
| 1 | 0 | 0 | 0 |
| 1 | 0 | 0 | 0 |
| 1 | 2 | 2 | 2 |
| 2 | 2 | 2 | 2 |
| 1 | 2 | 2 | 2 |
| 2 | 2 | 2 | 2 |
| 2 | 2 | 2 | 2 |
| 2 | 2 | 2 | 2 |
| 2 | 2 | 2 | 2 |
| 1 | 0 | 0 | 0 |
| 1 | 2 | 2 | 2 |
| 2 | 2 | 2 | 2 |
| 2 | 2 | 2 | 2 |
| 2 | 2 | 2 | 2 |
| 2 | 2 | 2 | 2 |

|   |   |   |   |
|---|---|---|---|
| 2 | 2 | 2 | 2 |
| 2 | 2 | 2 | 2 |
| 1 | 0 | 0 | 0 |
| 2 | 2 | 2 | 2 |
| 2 | 2 | 2 | 2 |
| 2 | 2 | 2 | 2 |
| 2 | 2 | 2 | 2 |
| 2 | 2 | 2 | 2 |
| 0 | 0 | 0 | 0 |
| 2 | 2 | 2 | 2 |
| 2 | 2 | 2 | 2 |
| 2 | 2 | 2 | 2 |
| 2 | 2 | 2 | 2 |
| 2 | 2 | 2 | 2 |
| 2 | 2 | 2 | 2 |
| 2 | 2 | 2 | 2 |
| 2 | 2 | 2 | 2 |
| 2 | 2 | 2 | 2 |
| 1 | 1 | 1 | 1 |
| 2 | 2 | 2 | 2 |
| 2 | 2 | 2 | 2 |
| 2 | 2 | 2 | 2 |
| 2 | 2 | 2 | 2 |
| 2 | 2 | 2 | 2 |
| 0 | 0 | 0 | 0 |
| 2 | 2 | 9 | 2 |
| 2 | 2 | 2 | 2 |
| 2 | 2 | 2 | 2 |
| 2 | 2 | 2 | 2 |
| 0 | 0 | 0 | 0 |
| 2 | 2 | 2 | 2 |
| 0 | 0 | 9 | 0 |
| 2 | 2 | 2 | 2 |
| 2 | 2 | 2 | 2 |
| 2 | 2 | 2 | 2 |
| 2 | 2 | 2 | 2 |
| 2 | 2 | 2 | 2 |
| 2 | 2 | 2 | 2 |
| 2 | 2 | 2 | 2 |
| 0 | 0 | 0 | 0 |
| 0 | 0 | 0 | 0 |
| 2 | 2 | 2 | 2 |
| 0 | 0 | 0 | 0 |
| 2 | 2 | 2 | 2 |
| 2 | 2 | 2 | 2 |

|   |   |   |   |
|---|---|---|---|
| 2 | 2 | 2 | 2 |
| 2 | 2 | 2 | 2 |
| 2 | 2 | 2 | 2 |
| 2 | 2 | 2 | 2 |
| 2 | 2 | 2 | 2 |
| 0 | 0 | 0 | 0 |
| 2 | 2 | 2 | 2 |
| 2 | 2 | 2 | 2 |
| 0 | 0 | 0 | 0 |
| 2 | 2 | 2 | 2 |
| 2 | 2 | 2 | 2 |
| 2 | 2 | 2 | 2 |
| 2 | 2 | 2 | 2 |
| 2 | 2 | 2 | 2 |
| 2 | 2 | 2 | 2 |
| 0 | 0 | 0 | 0 |
| 0 | 0 | 0 | 0 |
| 2 | 2 | 2 | 2 |
| 2 | 2 | 2 | 2 |
| 0 | 0 | 0 | 0 |
| 0 | 0 | 1 | 0 |
| 2 | 2 | 2 | 2 |
| 2 | 2 | 2 | 2 |
| 0 | 0 | 0 | 0 |
| 0 | 0 | 0 | 0 |
| 0 | 0 | 0 | 0 |
| 2 | 2 | 2 | 2 |
| 2 | 2 | 2 | 2 |
| 2 | 2 | 2 | 2 |
| 0 | 0 | 0 | 0 |
| 2 | 2 | 2 | 2 |
| 0 | 0 | 0 | 0 |
| 2 | 2 | 2 | 2 |
| 2 | 2 | 2 | 2 |
| 2 | 2 | 2 | 2 |
| 2 | 2 | 2 | 2 |
| 2 | 2 | 2 | 2 |
| 0 | 0 | 0 | 0 |
| 0 | 0 | 0 | 0 |



|   |   |   |   |
|---|---|---|---|
| 0 | 0 | 0 | 0 |
| 0 | 0 | 0 | 0 |
| 2 | 2 | 2 | 2 |
| 0 | 0 | 0 | 0 |
| 2 | 2 | 2 | 2 |
| 0 | 0 | 0 | 0 |
| 2 | 2 | 2 | 2 |
| 2 | 2 | 2 | 2 |
| 2 | 2 | 2 | 2 |
| 2 | 2 | 2 | 2 |
| 2 | 2 | 2 | 2 |
| 2 | 2 | 2 | 2 |
| 2 | 2 | 2 | 2 |
| 0 | 0 | 0 | 0 |
| 2 | 2 | 2 | 2 |
| 2 | 2 | 2 | 2 |
| 2 | 2 | 2 | 2 |
| 2 | 2 | 2 | 2 |
| 2 | 2 | 2 | 2 |
| 2 | 2 | 2 | 2 |
| 2 | 2 | 2 | 2 |
| 0 | 0 | 0 | 0 |
| 2 | 2 | 2 | 2 |
| 2 | 2 | 2 | 2 |
| 2 | 2 | 2 | 2 |
| 2 | 2 | 2 | 2 |
| 2 | 2 | 2 | 2 |
| 2 | 2 | 2 | 2 |
| 2 | 2 | 2 | 2 |
| 2 | 2 | 2 | 2 |
| 2 | 2 | 2 | 2 |
| 2 | 2 | 2 | 2 |
| 2 | 2 | 2 | 2 |
| 2 | 2 | 2 | 2 |
| 2 | 2 | 2 | 2 |
| 0 | 0 | 0 | 0 |
| 0 | 0 | 0 | 0 |
| 2 | 2 | 2 | 2 |
| 2 | 2 | 2 | 2 |
| 2 | 2 | 2 | 2 |
| 2 | 2 | 2 | 2 |
| 2 | 2 | 2 | 2 |
| 2 | 2 | 2 | 2 |
| 2 | 2 | 2 | 2 |
| 0 | 0 | 0 | 0 |
| 2 | 2 | 2 | 2 |

|   |   |   |   |
|---|---|---|---|
| 0 | 0 | 0 | 0 |
| 0 | 0 | 0 | 0 |
| 0 | 0 | 0 | 0 |
| 0 | 0 | 0 | 0 |
| 2 | 2 | 2 | 2 |
| 2 | 2 | 2 | 2 |
| 2 | 2 | 2 | 2 |
| 2 | 2 | 2 | 2 |
| 0 | 0 | 0 | 0 |
| 2 | 2 | 2 | 2 |
| 2 | 2 | 2 | 2 |
| 2 | 2 | 2 | 2 |
| 2 | 2 | 2 | 2 |
| 2 | 2 | 2 | 2 |
| 0 | 0 | 0 | 0 |
| 2 | 2 | 2 | 2 |
| 2 | 2 | 2 | 2 |
| 2 | 2 | 2 | 2 |
| 2 | 2 | 2 | 2 |
| 2 | 2 | 2 | 2 |
| 2 | 2 | 2 | 2 |
| 0 | 0 | 0 | 0 |
| 2 | 2 | 2 | 2 |
| 0 | 0 | 0 | 0 |
| 2 | 2 | 2 | 2 |
| 2 | 2 | 2 | 2 |
| 0 | 0 | 0 | 0 |
| 2 | 2 | 2 | 2 |
| 2 | 2 | 2 | 2 |
| 0 | 0 | 0 | 0 |
| 0 | 0 | 0 | 0 |
| 0 | 0 | 0 | 0 |
| 2 | 2 | 2 | 2 |
| 2 | 2 | 2 | 2 |
| 2 | 2 | 2 | 2 |
| 0 | 0 | 0 | 0 |
| 2 | 2 | 2 | 2 |

|   |   |   |   |
|---|---|---|---|
| 0 | 0 | 0 | 0 |
| 2 | 2 | 2 | 2 |
| 2 | 2 | 1 | 2 |
| 2 | 2 | 2 | 2 |
| 2 | 2 | 2 | 2 |
| 2 | 2 | 2 | 2 |
| 2 | 2 | 2 | 2 |
| 2 | 2 | 2 | 2 |
| 0 | 0 | 0 | 0 |
| 2 | 2 | 2 | 2 |
| 2 | 2 | 2 | 2 |
| 2 | 2 | 2 | 2 |
| 2 | 2 | 2 | 2 |
| 2 | 2 | 2 | 2 |
| 2 | 2 | 2 | 2 |
| 0 | 0 | 0 | 0 |
| 0 | 0 | 0 | 0 |
| 2 | 2 | 2 | 2 |
| 2 | 2 | 2 | 2 |
| 2 | 2 | 2 | 2 |
| 2 | 2 | 2 | 2 |
| 2 | 2 | 2 | 2 |
| 2 | 2 | 2 | 2 |
| 2 | 2 | 2 | 2 |
| 2 | 2 | 2 | 2 |
| 2 | 2 | 2 | 2 |
| 2 | 2 | 2 | 2 |
| 1 | 2 | 2 | 2 |
| 2 | 2 | 2 | 2 |
| 2 | 2 | 2 | 2 |
| 2 | 2 | 2 | 2 |
| 2 | 2 | 2 | 2 |
| 2 | 2 | 2 | 2 |
| 0 | 0 | 0 | 0 |
| 2 | 2 | 2 | 2 |
| 2 | 2 | 2 | 2 |
| 2 | 2 | 2 | 2 |
| 2 | 2 | 2 | 2 |
| 2 | 2 | 2 | 2 |
| 2 | 2 | 2 | 2 |
| 2 | 2 | 2 | 2 |
| 2 | 2 | 2 | 2 |
| 2 | 2 | 2 | 2 |
| 0 | 0 | 0 | 0 |

|   |   |   |   |
|---|---|---|---|
| 2 | 2 | 2 | 2 |
| 2 | 2 | 2 | 2 |
| 0 | 0 | 0 | 0 |
| 2 | 2 | 2 | 2 |
| 0 | 0 | 0 | 0 |
| 2 | 2 | 2 | 2 |
| 2 | 2 | 2 | 2 |
| 2 | 2 | 2 | 2 |
| 2 | 2 | 2 | 2 |
| 2 | 2 | 2 | 2 |
| 2 | 2 | 2 | 2 |
| 2 | 2 | 2 | 2 |
| 2 | 2 | 2 | 2 |
| 2 | 2 | 2 | 2 |
| 2 | 2 | 2 | 2 |
| 2 | 2 | 2 | 2 |
| 2 | 2 | 2 | 2 |
| 2 | 2 | 2 | 2 |
| 2 | 2 | 2 | 2 |
| 2 | 2 | 2 | 2 |
| 2 | 2 | 2 | 2 |
| 0 | 0 | 0 | 0 |
| 2 | 2 | 2 | 2 |
| 2 | 2 | 2 | 2 |
| 0 | 0 | 0 | 0 |
| 2 | 2 | 2 | 2 |
| 2 | 2 | 2 | 2 |
| 2 | 2 | 2 | 2 |
| 0 | 0 | 0 | 0 |
| 2 | 2 | 2 | 2 |
| 2 | 2 | 2 | 2 |
| 2 | 2 | 2 | 2 |
| 0 | 0 | 0 | 0 |
| 2 | 2 | 2 | 2 |
| 0 | 0 | 0 | 0 |
| 0 | 0 | 0 | 0 |
| 2 | 2 | 2 | 2 |
| 0 | 0 | 0 | 0 |
| 0 | 0 | 0 | 0 |

|   |   |   |   |
|---|---|---|---|
| 2 | 2 | 2 | 2 |
| 2 | 2 | 2 | 2 |
| 2 | 2 | 2 | 2 |
| 0 | 0 | 0 | 0 |
| 2 | 2 | 2 | 2 |
| 2 | 2 | 2 | 2 |
| 2 | 2 | 2 | 2 |
| 2 | 2 | 2 | 2 |
| 2 | 2 | 2 | 2 |
| 0 | 0 | 0 | 0 |
| 2 | 2 | 2 | 2 |
| 2 | 2 | 2 | 2 |
| 2 | 2 | 2 | 2 |
| 0 | 0 | 0 | 0 |
| 2 | 2 | 2 | 2 |
| 2 | 2 | 2 | 2 |
| 2 | 2 | 2 | 2 |
| 2 | 2 | 2 | 2 |
| 2 | 2 | 2 | 2 |
| 2 | 2 | 2 | 2 |
| 2 | 2 | 2 | 2 |
| 2 | 2 | 2 | 2 |
| 2 | 2 | 2 | 2 |
| 2 | 2 | 2 | 2 |
| 2 | 2 | 2 | 2 |
| 0 | 0 | 0 | 0 |
| 2 | 2 | 2 | 2 |
| 0 | 0 | 0 | 0 |
| 2 | 2 | 2 | 2 |
| 2 | 2 | 2 | 2 |
| 0 | 0 | 0 | 0 |
| 2 | 2 | 2 | 2 |
| 2 | 2 | 2 | 2 |
| 0 | 0 | 0 | 0 |
| 2 | 2 | 2 | 2 |
| 2 | 2 | 2 | 2 |
| 0 | 0 | 0 | 0 |
| 2 | 2 | 2 | 2 |
| 2 | 2 | 2 | 2 |
| 0 | 0 | 0 | 0 |
| 2 | 2 | 2 | 2 |
| 2 | 2 | 2 | 2 |
| 2 | 2 | 2 | 2 |
| 2 | 2 | 2 | 2 |

|   |   |   |   |
|---|---|---|---|
| 0 | 0 | 0 | 0 |
| 2 | 2 | 2 | 2 |
| 2 | 2 | 2 | 2 |
| 2 | 2 | 2 | 2 |
| 2 | 2 | 2 | 2 |
| 2 | 2 | 2 | 2 |
| 0 | 0 | 0 | 0 |
| 2 | 2 | 2 | 2 |
| 2 | 2 | 2 | 2 |
| 2 | 2 | 2 | 2 |
| 0 | 0 | 0 | 0 |
| 2 | 2 | 2 | 2 |
| 2 | 2 | 2 | 2 |
| 2 | 2 | 2 | 2 |
| 2 | 2 | 2 | 2 |
| 0 | 0 | 0 | 0 |
| 2 | 2 | 2 | 2 |
| 2 | 2 | 2 | 2 |
| 2 | 2 | 2 | 2 |
| 2 | 2 | 2 | 2 |
| 2 | 2 | 2 | 2 |
| 0 | 0 | 0 | 0 |
| 2 | 2 | 2 | 2 |
| 2 | 2 | 2 | 2 |
| 2 | 2 | 2 | 2 |
| 2 | 2 | 2 | 2 |
| 2 | 2 | 2 | 2 |
| 2 | 2 | 2 | 2 |
| 2 | 2 | 2 | 2 |
| 2 | 2 | 2 | 2 |
| 2 | 2 | 2 | 2 |
| 2 | 2 | 2 | 2 |
| 0 | 0 | 0 | 0 |
| 0 | 0 | 0 | 0 |
| 2 | 2 | 2 | 2 |
| 2 | 2 | 2 | 2 |
| 2 | 2 | 2 | 2 |
| 2 | 2 | 2 | 2 |
| 2 | 2 | 2 | 2 |

|   |   |   |   |
|---|---|---|---|
| 2 | 2 | 2 | 2 |
| 2 | 2 | 2 | 2 |
| 2 | 2 | 2 | 2 |
| 2 | 2 | 2 | 2 |
| 2 | 2 | 2 | 2 |
| 2 | 2 | 2 | 2 |
| 2 | 2 | 2 | 2 |
| 2 | 2 | 2 | 2 |
| 2 | 2 | 2 | 2 |
| 0 | 0 | 0 | 0 |
| 2 | 2 | 2 | 2 |
| 0 | 0 | 0 | 0 |
| 0 | 0 | 0 | 0 |
| 2 | 2 | 2 | 2 |
| 2 | 2 | 2 | 2 |
| 2 | 2 | 2 | 2 |
| 2 | 2 | 2 | 2 |
| 2 | 2 | 2 | 2 |
| 0 | 0 | 0 | 0 |
| 2 | 2 | 2 | 2 |
| 2 | 2 | 2 | 2 |
| 2 | 2 | 2 | 2 |
| 2 | 2 | 2 | 2 |
| 2 | 2 | 2 | 2 |
| 2 | 2 | 2 | 2 |
| 0 | 0 | 0 | 0 |
| 2 | 2 | 2 | 2 |
| 2 | 2 | 2 | 2 |
| 0 | 0 | 0 | 0 |
| 0 | 0 | 0 | 0 |
| 0 | 0 | 0 | 0 |
| 2 | 2 | 2 | 2 |
| 2 | 2 | 2 | 2 |
| 2 | 2 | 2 | 2 |
| 2 | 2 | 2 | 2 |
| 2 | 2 | 2 | 2 |
| 0 | 0 | 0 | 0 |
| 2 | 2 | 2 | 2 |
| 0 | 0 | 0 | 0 |
| 2 | 2 | 2 | 2 |

|   |   |   |   |
|---|---|---|---|
| 0 | 0 | 0 | 0 |
| 2 | 2 | 2 | 2 |
| 0 | 0 | 0 | 0 |
| 2 | 2 | 2 | 2 |
| 2 | 2 | 2 | 2 |
| 2 | 2 | 2 | 2 |
| 2 | 2 | 2 | 2 |
| 2 | 2 | 2 | 2 |
| 2 | 2 | 2 | 2 |
| 0 | 0 | 0 | 0 |
| 2 | 2 | 2 | 2 |
| 2 | 2 | 2 | 2 |
| 2 | 2 | 2 | 2 |
| 0 | 0 | 0 | 0 |
| 2 | 2 | 2 | 2 |
| 2 | 2 | 2 | 2 |
| 2 | 2 | 2 | 2 |
| 2 | 2 | 2 | 2 |
| 2 | 2 | 2 | 2 |
| 2 | 2 | 2 | 2 |
| 2 | 2 | 2 | 2 |
| 2 | 2 | 2 | 2 |
| 2 | 2 | 2 | 2 |
| 2 | 2 | 2 | 2 |
| 2 | 2 | 2 | 2 |
| 2 | 2 | 2 | 2 |
| 2 | 2 | 2 | 2 |
| 0 | 0 | 0 | 0 |
| 2 | 2 | 2 | 2 |
| 0 | 0 | 0 | 0 |
| 2 | 2 | 2 | 2 |
| 2 | 2 | 2 | 2 |
| 0 | 0 | 0 | 0 |
| 2 | 2 | 2 | 2 |
| 0 | 0 | 0 | 0 |
| 2 | 2 | 2 | 2 |
| 2 | 2 | 2 | 2 |
| 2 | 2 | 2 | 2 |
| 2 | 2 | 2 | 2 |





|   |   |   |   |
|---|---|---|---|
| 2 | 2 | 2 | 2 |
| 2 | 2 | 2 | 2 |
| 2 | 2 | 2 | 2 |
| 2 | 2 | 2 | 2 |
| 0 | 0 | 0 | 0 |
| 2 | 2 | 2 | 2 |
| 2 | 2 | 2 | 2 |
| 2 | 2 | 2 | 2 |
| 2 | 2 | 2 | 2 |
| 2 | 2 | 2 | 2 |
| 2 | 2 | 2 | 2 |
| 2 | 2 | 2 | 2 |
| 2 | 2 | 2 | 2 |
| 0 | 0 | 1 | 0 |
| 2 | 2 | 2 | 2 |
| 2 | 2 | 2 | 2 |
| 0 | 0 | 0 | 0 |
| 2 | 2 | 2 | 2 |
| 2 | 2 | 2 | 2 |
| 0 | 0 | 0 | 0 |
| 0 | 0 | 0 | 0 |
| 2 | 2 | 2 | 2 |
| 0 | 0 | 0 | 0 |
| 2 | 2 | 2 | 2 |
| 2 | 2 | 2 | 2 |
| 2 | 2 | 2 | 2 |
| 2 | 2 | 2 | 2 |
| 2 | 2 | 2 | 2 |
| 2 | 2 | 2 | 2 |
| 2 | 2 | 2 | 2 |
| 2 | 2 | 2 | 2 |
| 0 | 0 | 9 | 0 |
| 2 | 2 | 2 | 2 |
| 2 | 2 | 2 | 2 |
| 0 | 0 | 0 | 0 |
| 2 | 2 | 2 | 2 |
| 2 | 2 | 2 | 2 |
| 2 | 2 | 2 | 2 |
| 0 | 0 | 0 | 0 |
| 2 | 2 | 2 | 2 |
| 2 | 2 | 2 | 2 |
| 2 | 2 | 2 | 2 |
| 0 | 0 | 0 | 0 |
| 2 | 2 | 2 | 2 |
| 2 | 2 | 2 | 2 |
| 2 | 2 | 2 | 2 |
| 2 | 2 | 2 | 2 |



|   |   |   |   |
|---|---|---|---|
| 2 | 2 | 2 | 2 |
| 2 | 2 | 2 | 2 |
| 2 | 2 | 2 | 2 |
| 2 | 2 | 2 | 2 |
| 2 | 2 | 2 | 2 |
| 0 | 0 | 0 | 0 |
| 2 | 2 | 2 | 2 |
| 0 | 0 | 0 | 0 |
| 2 | 2 | 2 | 2 |
| 2 | 2 | 2 | 2 |
| 2 | 2 | 2 | 2 |
| 2 | 2 | 2 | 2 |
| 2 | 2 | 2 | 2 |
| 0 | 0 | 0 | 0 |
| 2 | 2 | 2 | 2 |
| 2 | 2 | 2 | 2 |
| 2 | 2 | 2 | 2 |
| 0 | 0 | 0 | 0 |
| 2 | 2 | 2 | 2 |
| 0 | 0 | 0 | 0 |
| 0 | 0 | 0 | 0 |
| 2 | 2 | 2 | 2 |
| 0 | 0 | 0 | 0 |
| 2 | 2 | 2 | 2 |
| 0 | 0 | 0 | 0 |
| 2 | 2 | 2 | 2 |
| 2 | 2 | 2 | 2 |
| 2 | 2 | 2 | 2 |
| 2 | 2 | 2 | 2 |
| 2 | 2 | 2 | 2 |
| 2 | 2 | 2 | 2 |
| 0 | 0 | 0 | 0 |
| 0 | 0 | 0 | 0 |
| 2 | 2 | 2 | 2 |
| 0 | 0 | 0 | 0 |
| 2 | 2 | 2 | 2 |
| 2 | 2 | 2 | 2 |
| 2 | 2 | 2 | 2 |
| 2 | 2 | 2 | 2 |
| 2 | 2 | 2 | 2 |
| 2 | 2 | 2 | 2 |
| 0 | 0 | 0 | 0 |
| 2 | 2 | 2 | 2 |
| 2 | 2 | 2 | 2 |
| 2 | 2 | 2 | 2 |
| 2 | 2 | 2 | 2 |
| 2 | 2 | 2 | 2 |

|   |   |   |   |
|---|---|---|---|
| 2 | 2 | 2 | 2 |
| 2 | 2 | 2 | 2 |
| 2 | 2 | 2 | 2 |
| 2 | 2 | 2 | 2 |
| 2 | 2 | 2 | 2 |
| 2 | 2 | 2 | 2 |
| 2 | 2 | 2 | 2 |
| 2 | 2 | 2 | 2 |
| 2 | 2 | 2 | 2 |
| 2 | 2 | 2 | 2 |
| 0 | 0 | 0 | 0 |
| 2 | 2 | 2 | 2 |
| 2 | 2 | 2 | 2 |
| 2 | 2 | 2 | 2 |
| 2 | 2 | 2 | 2 |
| 2 | 2 | 2 | 2 |
| 2 | 2 | 2 | 2 |
| 2 | 2 | 2 | 2 |
| 2 | 2 | 2 | 2 |
| 0 | 0 | 0 | 0 |
| 2 | 2 | 2 | 2 |
| 0 | 0 | 0 | 0 |
| 0 | 0 | 0 | 0 |
| 2 | 2 | 2 | 2 |
| 2 | 2 | 9 | 2 |
| 2 | 2 | 2 | 2 |
| 2 | 2 | 2 | 2 |
| 2 | 2 | 2 | 2 |
| 0 | 0 | 0 | 0 |
| 2 | 2 | 2 | 2 |
| 0 | 0 | 0 | 0 |
| 2 | 2 | 2 | 2 |
| 2 | 2 | 2 | 2 |
| 2 | 2 | 2 | 2 |
| 2 | 2 | 2 | 2 |
| 2 | 2 | 2 | 2 |
| 2 | 2 | 2 | 2 |
| 2 | 2 | 2 | 2 |
| 2 | 2 | 2 | 2 |
| 2 | 2 | 2 | 2 |
| 0 | 0 | 0 | 0 |
| 0 | 0 | 0 | 0 |
| 2 | 2 | 2 | 2 |
| 2 | 2 | 2 | 2 |
| 2 | 2 | 2 | 2 |

|   |   |   |   |
|---|---|---|---|
| 2 | 2 | 2 | 2 |
| 2 | 2 | 2 | 2 |
| 2 | 2 | 2 | 2 |
| 2 | 2 | 2 | 2 |
| 2 | 2 | 2 | 2 |
| 2 | 2 | 2 | 2 |
| 0 | 0 | 0 | 0 |
| 2 | 2 | 2 | 2 |
| 2 | 2 | 2 | 2 |
| 2 | 2 | 2 | 2 |
| 2 | 2 | 2 | 2 |
| 2 | 2 | 2 | 2 |
| 2 | 2 | 2 | 2 |
| 2 | 2 | 2 | 2 |
| 0 | 0 | 0 | 0 |
| 0 | 0 | 0 | 0 |
| 0 | 0 | 0 | 0 |
| 0 | 0 | 0 | 0 |
| 2 | 2 | 2 | 2 |
| 0 | 0 | 0 | 0 |
| 2 | 2 | 2 | 2 |
| 2 | 2 | 2 | 2 |
| 2 | 2 | 2 | 2 |
| 2 | 2 | 2 | 2 |
| 2 | 2 | 2 | 2 |
| 2 | 2 | 2 | 2 |
| 2 | 2 | 2 | 2 |
| 2 | 2 | 2 | 2 |
| 2 | 2 | 2 | 2 |
| 2 | 2 | 2 | 2 |
| 0 | 0 | 0 | 0 |
| 0 | 0 | 0 | 0 |
| 2 | 2 | 2 | 2 |
| 2 | 2 | 2 | 2 |
| 0 | 0 | 0 | 0 |
| 0 | 0 | 0 | 0 |
| 2 | 2 | 2 | 2 |
| 0 | 0 | 0 | 0 |
| 2 | 2 | 2 | 2 |
| 0 | 0 | 0 | 0 |
| 2 | 2 | 2 | 2 |
| 2 | 2 | 2 | 2 |
| 2 | 2 | 2 | 2 |

|   |   |   |   |
|---|---|---|---|
| 2 | 2 | 2 | 2 |
| 2 | 2 | 2 | 2 |
| 2 | 2 | 2 | 2 |
| 0 | 0 | 0 | 0 |
| 2 | 2 | 2 | 2 |
| 2 | 2 | 2 | 2 |
| 0 | 0 | 0 | 0 |
| 2 | 2 | 2 | 2 |
| 2 | 2 | 2 | 2 |
| 2 | 2 | 2 | 2 |
| 0 | 0 | 0 | 0 |
| 2 | 2 | 2 | 2 |
| 2 | 2 | 2 | 2 |
| 2 | 2 | 2 | 2 |
| 2 | 2 | 2 | 2 |
| 2 | 2 | 2 | 2 |
| 2 | 2 | 2 | 2 |
| 2 | 2 | 2 | 2 |
| 2 | 2 | 2 | 2 |
| 2 | 2 | 2 | 2 |
| 0 | 0 | 0 | 0 |
| 2 | 2 | 2 | 2 |
| 2 | 2 | 2 | 2 |
| 2 | 2 | 2 | 2 |
| 2 | 2 | 2 | 2 |
| 2 | 2 | 2 | 2 |
| 2 | 2 | 2 | 2 |
| 0 | 0 | 0 | 0 |
| 2 | 2 | 2 | 2 |
| 2 | 2 | 2 | 2 |
| 2 | 2 | 2 | 2 |
| 2 | 2 | 2 | 2 |
| 2 | 2 | 2 | 2 |
| 0 | 0 | 0 | 0 |
| 2 | 2 | 2 | 2 |
| 2 | 2 | 2 | 2 |
| 2 | 2 | 2 | 2 |
| 0 | 0 | 0 | 0 |
| 2 | 2 | 2 | 2 |
| 2 | 2 | 2 | 2 |
| 2 | 2 | 2 | 2 |
| 0 | 0 | 0 | 0 |
| 2 | 2 | 2 | 2 |





|   |   |   |   |
|---|---|---|---|
| 2 | 2 | 2 | 2 |
| 2 | 2 | 2 | 2 |
| 2 | 2 | 2 | 2 |
| 2 | 2 | 2 | 2 |
| 0 | 0 | 0 | 0 |
| 0 | 0 | 0 | 0 |
| 2 | 2 | 2 | 2 |
| 2 | 2 | 2 | 2 |
| 0 | 0 | 0 | 0 |
| 0 | 0 | 0 | 0 |
| 2 | 2 | 2 | 2 |
| 0 | 0 | 0 | 0 |
| 2 | 2 | 2 | 2 |
| 2 | 2 | 2 | 2 |
| 2 | 2 | 2 | 2 |
| 2 | 2 | 2 | 2 |
| 0 | 0 | 0 | 0 |
| 0 | 0 | 0 | 0 |
| 0 | 0 | 0 | 0 |
| 0 | 0 | 0 | 0 |
| 0 | 0 | 0 | 0 |
| 0 | 0 | 0 | 0 |
| 2 | 2 | 2 | 2 |
| 2 | 2 | 2 | 2 |
| 2 | 2 | 2 | 2 |
| 0 | 0 | 0 | 0 |
| 0 | 0 | 0 | 0 |
| 0 | 0 | 9 | 0 |
| 2 | 2 | 2 | 2 |
| 0 | 0 | 0 | 0 |
| 0 | 0 | 0 | 0 |
| 2 | 2 | 2 | 2 |
| 2 | 2 | 2 | 2 |
| 2 | 2 | 2 | 2 |
| 2 | 2 | 2 | 2 |
| 2 | 2 | 2 | 2 |
| 2 | 2 | 2 | 2 |
| 2 | 2 | 2 | 2 |
| 0 | 0 | 0 | 0 |
| 0 | 0 | 0 | 0 |
| 2 | 2 | 2 | 2 |



|   |   |   |   |
|---|---|---|---|
| 2 | 2 | 2 | 2 |
| 2 | 2 | 2 | 2 |
| 2 | 2 | 2 | 2 |
| 2 | 2 | 2 | 2 |
| 0 | 0 | 0 | 0 |
| 2 | 2 | 2 | 2 |
| 0 | 0 | 0 | 0 |
| 2 | 2 | 2 | 2 |
| 0 | 0 | 0 | 0 |
| 2 | 2 | 2 | 2 |
| 2 | 2 | 2 | 2 |
| 0 | 0 | 0 | 0 |
| 0 | 0 | 0 | 0 |
| 0 | 0 | 0 | 0 |
| 2 | 2 | 2 | 2 |
| 2 | 2 | 2 | 2 |
| 0 | 0 | 0 | 0 |
| 2 | 2 | 2 | 2 |
| 0 | 0 | 0 | 0 |
| 2 | 2 | 2 | 2 |
| 2 | 2 | 2 | 2 |
| 2 | 2 | 2 | 2 |
| 2 | 2 | 2 | 2 |
| 0 | 0 | 0 | 0 |
| 0 | 0 | 0 | 0 |
| 2 | 2 | 2 | 2 |
| 2 | 2 | 2 | 2 |
| 2 | 2 | 9 | 2 |
| 0 | 0 | 0 | 0 |
| 2 | 2 | 2 | 2 |
| 0 | 0 | 0 | 0 |
| 2 | 2 | 2 | 2 |
| 2 | 2 | 2 | 2 |
| 0 | 0 | 0 | 0 |
| 0 | 0 | 0 | 0 |
| 0 | 0 | 0 | 0 |
| 2 | 2 | 2 | 2 |

|   |   |   |   |
|---|---|---|---|
| 0 | 0 | 0 | 0 |
| 2 | 2 | 2 | 2 |
| 0 | 0 | 0 | 0 |
| 0 | 0 | 0 | 0 |
| 2 | 2 | 2 | 2 |
| 0 | 0 | 0 | 0 |
| 2 | 2 | 2 | 2 |
| 2 | 2 | 2 | 2 |
| 2 | 2 | 2 | 2 |
| 2 | 2 | 2 | 2 |
| 2 | 2 | 2 | 2 |
| 0 | 0 | 0 | 0 |
| 2 | 2 | 2 | 2 |
| 2 | 2 | 2 | 2 |
| 9 | 0 | 0 | 9 |
| 0 | 0 | 0 | 0 |
| 0 | 0 | 0 | 0 |
| 2 | 2 | 2 | 2 |
| 2 | 2 | 2 | 2 |
| 2 | 2 | 2 | 2 |
| 2 | 2 | 2 | 2 |
| 2 | 2 | 2 | 2 |
| 2 | 2 | 9 | 2 |
| 2 | 2 | 2 | 2 |
| 2 | 2 | 2 | 2 |
| 2 | 2 | 2 | 2 |
| 2 | 2 | 2 | 2 |
| 2 | 2 | 2 | 2 |
| 2 | 2 | 2 | 2 |
| 2 | 2 | 2 | 2 |
| 2 | 2 | 2 | 2 |
| 2 | 2 | 2 | 2 |
| 2 | 2 | 2 | 2 |
| 0 | 0 | 0 | 0 |
| 2 | 2 | 2 | 2 |
| 2 | 2 | 2 | 2 |
| 2 | 2 | 2 | 2 |
| 0 | 0 | 0 | 0 |
| 2 | 2 | 2 | 2 |
| 2 | 2 | 2 | 2 |
| 2 | 2 | 2 | 2 |
| 2 | 2 | 2 | 2 |
| 2 | 2 | 2 | 2 |
| 2 | 2 | 2 | 2 |
| 0 | 0 | 1 | 0 |
| 0 | 0 | 0 | 0 |





|   |   |   |   |
|---|---|---|---|
| 0 | 0 | 0 | 0 |
| 0 | 0 | 0 | 0 |
| 0 | 0 | 0 | 0 |
| 2 | 2 | 2 | 2 |
| 1 | 2 | 2 | 2 |
| 2 | 2 | 2 | 2 |
| 1 | 2 | 2 | 2 |
| 1 | 0 | 1 | 0 |
| 2 | 2 | 2 | 2 |
| 1 | 0 | 0 | 0 |
| 0 | 0 | 1 | 0 |
| 0 | 0 | 1 | 0 |
| 2 | 2 | 1 | 2 |
| 0 | 0 | 1 | 0 |
| 2 | 2 | 2 | 2 |
| 0 | 0 | 1 | 0 |
| 2 | 2 | 2 | 2 |
| 2 | 2 | 2 | 2 |
| 2 | 2 | 1 | 2 |
| 2 | 2 | 2 | 2 |
| 2 | 2 | 2 | 2 |
| 0 | 0 | 1 | 0 |
| 2 | 2 | 2 | 2 |
| 2 | 2 | 1 | 2 |
| 2 | 2 | 2 | 2 |
| 2 | 2 | 1 | 2 |
| 2 | 2 | 2 | 2 |
| 2 | 2 | 2 | 2 |
| 0 | 0 | 1 | 0 |
| 0 | 0 | 1 | 0 |
| 0 | 0 | 1 | 0 |
| 2 | 2 | 2 | 2 |
| 0 | 0 | 1 | 0 |
| 0 | 0 | 1 | 0 |
| 0 | 0 | 1 | 0 |
| 0 | 0 | 1 | 0 |
| 2 | 2 | 1 | 2 |
| 2 | 2 | 2 | 2 |
| 2 | 2 | 2 | 2 |
| 0 | 0 | 1 | 0 |
| 2 | 2 | 2 | 2 |
| 0 | 0 | 1 | 0 |
| 0 | 0 | 1 | 0 |
| 0 | 0 | 1 | 0 |
| 2 | 2 | 1 | 2 |





|   |   |   |   |
|---|---|---|---|
| 2 | 2 | 2 | 2 |
| 2 | 2 | 2 | 2 |
| 1 | 0 | 1 | 0 |
| 2 | 2 | 2 | 2 |
| 2 | 2 | 1 | 2 |
| 2 | 2 | 2 | 2 |
| 1 | 2 | 2 | 2 |
| 1 | 2 | 2 | 2 |
| 2 | 2 | 1 | 2 |
| 2 | 0 | 2 | 0 |
| 2 | 0 | 1 | 0 |
| 2 | 0 | 1 | 0 |
| 0 | 2 | 1 | 2 |
| 2 | 2 | 2 | 2 |
| 2 | 2 | 2 | 2 |
| 2 | 2 | 2 | 2 |
| 2 | 2 | 2 | 2 |
| 1 | 2 | 2 | 2 |
| 1 | 2 | 2 | 2 |
| 2 | 2 | 2 | 2 |
| 1 | 2 | 2 | 2 |
| 2 | 2 | 1 | 2 |
| 0 | 2 | 2 | 2 |
| 2 | 2 | 1 | 2 |
| 1 | 2 | 2 | 2 |
| 2 | 2 | 2 | 2 |
| 2 | 0 | 1 | 0 |
| 2 | 0 | 0 | 0 |
| 2 | 2 | 2 | 2 |
| 2 | 0 | 0 | 0 |
| 2 | 2 | 2 | 2 |
| 2 | 0 | 1 | 0 |
| 2 | 2 | 2 | 2 |
| 1 | 2 | 2 | 2 |
| 2 | 2 | 2 | 2 |
| 2 | 0 | 1 | 0 |
| 2 | 2 | 2 | 2 |
| 2 | 2 | 2 | 2 |
| 0 | 2 | 2 | 2 |
| 2 | 0 | 0 | 0 |
| 2 | 2 | 2 | 2 |
| 2 | 2 | 1 | 2 |
| 2 | 2 | 1 | 2 |
| 2 | 2 | 1 | 2 |
| 2 | 2 | 1 | 2 |
| 2 | 2 | 1 | 2 |
| 1 | 0 | 1 | 0 |

|   |   |   |   |
|---|---|---|---|
| 2 | 2 | 2 | 2 |
| 2 | 0 | 1 | 0 |
| 2 | 0 | 1 | 0 |
| 1 | 2 | 2 | 2 |
| 2 | 0 | 1 | 0 |
| 2 | 2 | 1 | 2 |
| 2 | 2 | 1 | 2 |
| 2 | 2 | 1 | 2 |
| 0 | 2 | 2 | 2 |
| 2 | 2 | 2 | 2 |
| 2 | 1 | 2 | 2 |
| 2 | 2 | 2 | 2 |
| 2 | 2 | 1 | 2 |
| 2 | 1 | 1 | 0 |
| 2 | 1 | 0 | 0 |
| 2 | 1 | 1 | 0 |
| 2 | 2 | 2 | 2 |
| 2 | 2 | 2 | 2 |
| 2 | 2 | 2 | 2 |
| 2 | 1 | 1 | 0 |
| 2 | 2 | 2 | 2 |
| 2 | 2 | 2 | 2 |
| 2 | 1 | 1 | 0 |
| 2 | 2 | 2 | 2 |
| 2 | 2 | 1 | 2 |
| 1 | 1 | 2 | 2 |
| 1 | 1 | 2 | 2 |
| 2 | 2 | 2 | 2 |
| 2 | 2 | 2 | 2 |
| 2 | 1 | 1 | 0 |
| 1 | 0 | 1 | 0 |
| 2 | 2 | 2 | 2 |
| 2 | 2 | 2 | 2 |
| 1 | 1 | 2 | 2 |
| 1 | 0 | 1 | 0 |
| 1 | 1 | 2 | 2 |
| 1 | 1 | 2 | 2 |
| 1 | 0 | 1 | 0 |
| 1 | 0 | 1 | 0 |
| 2 | 2 | 2 | 2 |
| 2 | 2 | 2 | 2 |
| 2 | 2 | 1 | 2 |
| 1 | 1 | 2 | 2 |
| 1 | 0 | 1 | 0 |
| 2 | 2 | 2 | 2 |
| 1 | 0 | 1 | 0 |
| 2 | 2 | 1 | 2 |

|   |   |   |   |
|---|---|---|---|
| 2 | 2 | 1 | 2 |
| 1 | 0 | 1 | 0 |
| 1 | 0 | 1 | 0 |
| 1 | 0 | 1 | 0 |
| 1 | 0 | 1 | 0 |
| 1 | 0 | 1 | 0 |
| 1 | 2 | 2 | 2 |
| 1 | 0 | 1 | 0 |
| 1 | 0 | 1 | 0 |
| 1 | 0 | 1 | 0 |
| 2 | 1 | 1 | 0 |
| 2 | 2 | 2 | 2 |
| 2 | 2 | 2 | 2 |
| 1 | 2 | 2 | 2 |
| 2 | 2 | 2 | 2 |
| 2 | 2 | 2 | 2 |
| 2 | 2 | 2 | 2 |
| 1 | 1 | 2 | 2 |
| 1 | 1 | 2 | 2 |
| 2 | 2 | 2 | 2 |
| 1 | 1 | 2 | 2 |
| 1 | 1 | 2 | 2 |
| 1 | 1 | 2 | 2 |
| 1 | 1 | 1 | 0 |
| 1 | 1 | 2 | 2 |
| 1 | 1 | 2 | 2 |
| 1 | 1 | 2 | 2 |
| 1 | 1 | 2 | 2 |
| 1 | 1 | 2 | 2 |
| 1 | 1 | 2 | 2 |
| 1 | 1 | 2 | 2 |
| 1 | 1 | 2 | 2 |
| 1 | 1 | 2 | 2 |
| 1 | 1 | 2 | 2 |
| 1 | 1 | 1 | 2 |
| 1 | 1 | 1 | 0 |
| 2 | 2 | 1 | 2 |
| 1 | 1 | 1 | 0 |
| 2 | 2 | 1 | 2 |
| 1 | 1 | 2 | 2 |
| 2 | 2 | 1 | 2 |
| 2 | 2 | 1 | 2 |
| 1 | 1 | 2 | 2 |
| 2 | 2 | 2 | 2 |
| 2 | 2 | 1 | 2 |
| 2 | 2 | 2 | 2 |
| 1 | 1 | 1 | 2 |
| 1 | 1 | 2 | 2 |
| 1 | 1 | 2 | 2 |

|   |   |   |   |
|---|---|---|---|
| 1 | 1 | 2 | 2 |
| 1 | 1 | 1 | 0 |
| 1 | 1 | 1 | 2 |
| 2 | 2 | 1 | 2 |
| 1 | 1 | 1 | 2 |
| 1 | 1 | 2 | 2 |
| 2 | 2 | 2 | 2 |
| 1 | 1 | 2 | 2 |
| 1 | 1 | 2 | 2 |
| 2 | 2 | 1 | 2 |
| 2 | 2 | 2 | 2 |
| 1 | 1 | 1 | 0 |
| 2 | 2 | 1 | 2 |
| 1 | 2 | 2 | 2 |
| 2 | 2 | 2 | 2 |
| 1 | 2 | 2 | 2 |
| 1 | 2 | 2 | 2 |
| 0 | 1 | 2 | 2 |
| 1 | 1 | 2 | 2 |
| 1 | 2 | 2 | 2 |
| 0 | 1 | 2 | 2 |
| 1 | 2 | 2 | 2 |
| 2 | 2 | 2 | 2 |
| 1 | 1 | 2 | 2 |
| 2 | 2 | 2 | 2 |
